# Supplementary material for: Multi-Omics Signatures Identification for LUAD Prognosis Prediction Model Based on the Integrative Analysis of Immune and Hypoxia Signals
Source: Front Cell Dev Biol. 2022 Mar 10;10:840466. doi: 10.3389/fcell.2022.840466 (PMC8960258; doi:10.3389/fcell.2022.840466)
Supplement: Supplementary file 10 [file Table5.XLSX]

## Sheet: Sheet1
probe	logFC	AveExpr	t	P.Value	adj.P.Val	B	High_Low_AVG	Low_High_AVG	deltaBeta	CHR	MAPINFO	Strand	Type	gene	feature	cgi	feat.cgi	UCSC_CpG_Islands_Name	DHS	Enhancer	Phantom	Probe_SNPs	Probe_SNPs_10
cg03998264	-0.151006	0.277159	-14.6691	5.12281e-36	6.156e-31	71.0455	0.213095	0.364102	0.151006	12	53932355	F	II	ATF7	Body	opensea	Body-opensea		NA	TRUE
cg21057323	0.161496	0.627303	14.3186	8.75593e-35	3.9457e-30	68.2205	0.695817	0.534321	-0.161496	14	103412980	F	II	CDC42BPB	Body	opensea	Body-opensea		NA	NA
cg21366673	0.156165	0.673029	14.1722	2.85992e-34	8.47672e-30	67.0426	0.739281	0.583115	-0.156165	6	30459512	R	II	HLA-E	Body	shore	Body-shore	chr6:30457369-30458175	NA	NA
cg14263391	-0.155506	0.34691	-13.7895	6.26327e-33	1.02634e-28	63.9716	0.280938	0.436444	0.155506	17	37894014	R	I	GRB7	TSS1500	opensea	TSS1500-opensea		NA	NA
cg06436185	-0.162798	0.291152	-13.6065	2.72712e-32	3.15786e-28	62.5081	0.222086	0.384884	0.162798	7	151442351	F	I	PRKAG2	Body	opensea	Body-opensea		TRUE	NA
cg03526142	0.167441	0.625277	13.4534	9.31814e-32	9.06487e-28	61.2858	0.696313	0.528872	-0.167441	17	33864734	F	II	SLFN12L	5'UTR	opensea	5'UTR-opensea		NA	NA		rs8082605
cg01058360	-0.154112	0.349354	-13.3361	2.38495e-31	1.76338e-27	60.351	0.283973	0.438085	0.154112	7	151442371	F	II	PRKAG2	Body	opensea	Body-opensea		TRUE	NA
cg08912860	-0.188659	0.498631	-13.1379	1.16222e-30	5.9012e-27	58.7759	0.418593	0.607252	0.188659	12	132863782	F	II	GALNT9	Body	shore	Body-shore	chr12:132865236-132865506	NA	NA
cg26876664	0.169418	0.549647	13.1077	1.47966e-30	6.83876e-27	58.5357	0.621521	0.452103	-0.169418	2	240302637	F	I	HDAC4	5'UTR	opensea	5'UTR-opensea		NA	NA
cg23949574	0.163823	0.63156	12.9711	4.39354e-30	1.63288e-26	57.4534	0.701061	0.537237	-0.163823	2	240302855	F	I	HDAC4	5'UTR	opensea	5'UTR-opensea		NA	TRUE
cg10933959	-0.156745	0.362645	-12.5729	1.03499e-28	2.26132e-25	54.3121	0.296147	0.452892	0.156745	15	100890907	R	II	FLJ42289	TSS1500	shore	TSS1500-shore	chr15:100890242-100890494	NA	NA
cg06152215	0.153832	0.579048	12.5361	1.38415e-28	2.90113e-25	54.0231	0.64431	0.490478	-0.153832	12	124422259	R	II	CCDC92	Body	shore	Body-shore	chr12:124421581-124422163	NA	TRUE
cg14195992	-0.164585	0.426974	-12.5127	1.66591e-28	3.39304e-25	53.8389	0.35715	0.521736	0.164585	8	48265917	R	II	KIAA0146	Body	opensea	Body-opensea		TRUE	TRUE
cg25316305	-0.204046	0.569375	-12.4927	1.95059e-28	3.90665e-25	53.6821	0.48281	0.686856	0.204046	12	4361135	F	II		IGR	opensea	IGR-opensea		NA	TRUE
cg01493517	0.161641	0.546828	12.4829	2.10692e-28	4.19644e-25	53.6055	0.615402	0.453762	-0.161641	12	6665447	F	II	IFFO1	TSS1500	shore	TSS1500-shore	chr12:6664425-6665336	NA	NA
cg06398242	-0.180005	0.38846	-12.3258	7.26408e-28	1.15546e-24	52.3752	0.312094	0.492099	0.180005	2	46049176	R	I	PRKCE	Body	opensea	Body-opensea		TRUE	TRUE
cg24172324	0.150973	0.646947	12.2904	9.59553e-28	1.48465e-24	52.0985	0.710996	0.560023	-0.150973	2	232258363	F	II		IGR	shore	IGR-shore	chr2:232260100-232261134	NA	NA
cg22614759	0.155395	0.525829	12.2059	1.86353e-27	2.64493e-24	51.4388	0.591754	0.436359	-0.155395	12	15113093	R	II	ARHGDIB	5'UTR	opensea	5'UTR-opensea		NA	TRUE
cg03436397	0.160271	0.572601	12.2023	1.91648e-27	2.68833e-24	51.411	0.640595	0.480324	-0.160271	7	102067162	R	II		IGR	opensea	IGR-opensea		NA	NA			rs78666676
cg00326131	-0.156678	0.458444	-12.164	2.589e-27	3.49568e-24	51.1121	0.391974	0.548652	0.156678	2	74668477	R	I	RTKN	Body	island	Body-island	chr2:74667593-74669403	NA	NA
cg06613738	-0.160541	0.419828	-12.1511	2.86496e-27	3.76946e-24	51.0114	0.351719	0.512261	0.160541	16	15596423	R	II	C16orf45	Body	opensea	Body-opensea		TRUE	TRUE
cg18173230	-0.151883	0.448606	-12.0803	4.98687e-27	6.13581e-24	50.4606	0.384171	0.536054	0.151883	2	238207644	F	II		IGR	opensea	IGR-opensea		NA	TRUE		rs76371498
cg08579420	-0.177542	0.535916	-12.0298	7.4029e-27	8.63683e-24	50.068	0.460595	0.638137	0.177542	17	31594469	F	II	ACCN1	Body	opensea	Body-opensea		NA	TRUE
cg08655953	-0.173881	0.445215	-12.0261	7.61826e-27	8.83094e-24	50.0396	0.371448	0.545329	0.173881	1	2425888	R	I	PLCH2	Body	opensea	Body-opensea		NA	NA
cg18637383	0.157144	0.622632	11.9648	1.22998e-26	1.34368e-23	49.5636	0.689299	0.532155	-0.157144	2	37308026	F	II	HEATR5B	Body	shelf	Body-shelf	chr2:37311072-37311893	NA	NA
cg26373351	-0.157916	0.448637	-11.9595	1.28113e-26	1.3828e-23	49.5231	0.381642	0.539558	0.157916	12	12031304	F	II	ETV6	Body	opensea	Body-opensea		TRUE	TRUE
cg24282479	-0.169507	0.607371	-11.9411	1.47951e-26	1.57336e-23	49.38	0.535459	0.704966	0.169507	6	138408963	F	II		IGR	opensea	IGR-opensea		NA	TRUE		rs76979261
cg21472506	0.221334	0.547824	11.8444	3.14287e-26	3.07886e-23	48.6315	0.641724	0.42039	-0.221334	2	63283967	F	I	OTX1	3'UTR	island	3'UTR-island	chr2:63283936-63284147	NA	TRUE
cg00810292	0.17121	0.521666	11.8438	3.15781e-26	3.08511e-23	48.6267	0.594301	0.423091	-0.17121	13	75900518	R	I	TBC1D4	Body	opensea	Body-opensea		NA	TRUE			rs56223054
cg23087707	-0.22249	0.592948	-11.8275	3.58476e-26	3.44658e-23	48.5008	0.498558	0.721048	0.22249	12	132863869	F	II	GALNT9	Body	shore	Body-shore	chr12:132865236-132865506	NA	NA			rs34592717
cg10122865	0.211971	0.586707	11.7889	4.83759e-26	4.48603e-23	48.203	0.676634	0.464663	-0.211971	2	63284132	F	I	OTX1	3'UTR	island	3'UTR-island	chr2:63283936-63284147	NA	TRUE
cg20597842	-0.185557	0.555376	-11.7767	5.32054e-26	4.83779e-23	48.1085	0.476655	0.662212	0.185557	12	7818585	R	II	APOBEC1	TSS200	opensea	TSS200-opensea		NA	NA
cg09524946	0.165146	0.513483	11.7709	5.56505e-26	5.02814e-23	48.0638	0.583545	0.418399	-0.165146	13	50706810	R	II		IGR	shore	IGR-shore	chr13:50707585-50708019	NA	NA
cg16396191	-0.159048	0.424197	-11.7257	7.90177e-26	6.8149e-23	47.7155	0.356722	0.515771	0.159048	13	42184765	R	II	KIAA0564	Body	opensea	Body-opensea		TRUE	TRUE
cg01413354	0.156447	0.547586	11.6947	1.00492e-25	8.48428e-23	47.4767	0.613958	0.45751	-0.156447	9	136017755	R	II	RALGDS	Body	shore	Body-shore	chr9:136019708-136020134	NA	TRUE
cg02753187	0.184587	0.516437	11.6929	1.01901e-25	8.58318e-23	47.4629	0.594747	0.410159	-0.184587	17	46919180	R	II	CALCOCO2	Body	opensea	Body-opensea		NA	NA
cg12550241	-0.172653	0.466	-11.6616	1.2993e-25	1.06941e-22	47.2215	0.392753	0.565407	0.172653	1	248859041	F	II		IGR	shelf	IGR-shelf	chr1:248855030-248855470	NA	NA
cg10923855	-0.163972	0.548884	-11.5924	2.2191e-25	1.71673e-22	46.6898	0.47932	0.643292	0.163972	12	34488830	R	II		IGR	island	IGR-island	chr12:34488610-34489037	NA	NA
cg23737737	0.181573	0.531398	11.5914	2.23653e-25	1.72651e-22	46.6821	0.608429	0.426856	-0.181573	12	6665370	R	I	IFFO1	TSS200	shore	TSS200-shore	chr12:6664425-6665336	NA	NA
cg23229261	0.180594	0.47235	11.5435	3.23943e-25	2.36882e-22	46.3141	0.548966	0.368372	-0.180594	2	63284066	F	I	OTX1	3'UTR	island	3'UTR-island	chr2:63283936-63284147	NA	TRUE
cg20632143	0.175873	0.421537	11.5326	3.52359e-25	2.54054e-22	46.2306	0.49615	0.320277	-0.175873	12	51415652	F	II	SLC11A2	5'UTR	shelf	5'UTR-shelf	chr12:51419640-51420347	NA	NA
cg17187764	-0.158067	0.502946	-11.5013	4.48375e-25	3.13413e-22	45.9913	0.435887	0.593954	0.158067	12	7818654	F	II	APOBEC1	TSS200	opensea	TSS200-opensea		NA	NA
cg17157798	-0.180263	0.537048	-11.4957	4.68113e-25	3.24751e-22	45.9485	0.460573	0.640836	0.180263	12	129595394	F	II	TMEM132D	Body	opensea	Body-opensea		NA	NA		rs76610610
cg20569893	0.158924	0.514519	11.4634	6.00843e-25	3.98907e-22	45.7006	0.581942	0.423018	-0.158924	17	27220101	R	II	FLOT2	Body	shelf	Body-shelf	chr17:27224005-27224873	NA	NA
cg17571559	-0.158342	0.38603	-11.4616	6.09207e-25	4.03717e-22	45.6868	0.318855	0.477196	0.158342	3	11267525	F	II	HRH1	5'UTR	opensea	5'UTR-opensea		TRUE	NA
cg06749213	-0.176875	0.561188	-11.4489	6.71768e-25	4.36352e-22	45.5897	0.48615	0.663025	0.176875	14	20387292	F	II	OR4K5	TSS1500	opensea	TSS1500-opensea		NA	NA
cg19473529	0.169897	0.43669	11.4193	8.43389e-25	5.33414e-22	45.3638	0.508767	0.338871	-0.169897	20	48726783	F	II	UBE2V1	Body	shelf	Body-shelf	chr20:48729268-48729798	NA	NA
cg27315333	0.157651	0.527563	11.4163	8.62857e-25	5.44771e-22	45.3411	0.594445	0.436794	-0.157651	2	63285950	R	II		IGR	island	IGR-island	chr2:63285949-63287097	NA	TRUE
cg04536957	-0.151788	0.552051	-11.4052	9.39955e-25	5.84471e-22	45.2562	0.487656	0.639445	0.151788	3	184487758	F	II		IGR	opensea	IGR-opensea		NA	NA
cg18543971	-0.185558	0.609616	-11.3848	1.09966e-24	6.68519e-22	45.1003	0.530894	0.716453	0.185558	15	86686938	F	II	AGBL1	5'UTR	opensea	5'UTR-opensea		NA	NA
cg18947951	0.185478	0.481409	11.3687	1.24509e-24	7.49351e-22	44.977	0.560097	0.374618	-0.185478	2	63285739	F	II		IGR	shore	IGR-shore	chr2:63285949-63287097	NA	NA
cg01916088	0.18147	0.595093	11.3627	1.3036e-24	7.78072e-22	44.9314	0.67208	0.49061	-0.18147	6	41528531	R	I	FOXP4	5'UTR	island	5'UTR-island	chr6:41528266-41528900	TRUE	TRUE
cg22177308	-0.161488	0.354183	-11.3458	1.48382e-24	8.69151e-22	44.8028	0.285673	0.447161	0.161488	17	63624698	F	II		IGR	opensea	IGR-opensea		NA	TRUE
cg00983904	0.162283	0.550277	11.3355	1.60647e-24	9.25146e-22	44.7239	0.619125	0.456842	-0.162283	12	6665288	R	I	IFFO1	TSS200	island	TSS200-island	chr12:6664425-6665336	NA	NA	high-CpG:6535366-6535558
cg03818715	-0.174753	0.449183	-11.331	1.66296e-24	9.54625e-22	44.6896	0.375046	0.549798	0.174753	6	7591348	R	II	SNRNP48	Body	shore	Body-shore	chr6:7590399-7590926	NA	NA
cg09179723	0.154763	0.723602	11.3295	1.68182e-24	9.62389e-22	44.6784	0.789259	0.634496	-0.154763	6	30704955	F	I	FLOT1	Body	opensea	Body-opensea		NA	NA		rs57132826
cg03841065	0.159978	0.618601	11.3189	1.82469e-24	1.03682e-21	44.5975	0.68647	0.526492	-0.159978	20	35274627	F	I	SLA2	TSS200	opensea	TSS200-opensea		NA	TRUE		rs221309
cg02906074	-0.177372	0.615729	-11.3188	1.82628e-24	1.03682e-21	44.5966	0.54048	0.717852	0.177372	14	73102873	R	II		IGR	opensea	IGR-opensea		NA	TRUE
cg04074481	-0.172137	0.561203	-11.2831	2.4008e-24	1.32542e-21	44.325	0.488176	0.660312	0.172137	12	4917740	R	II	KCNA6	TSS1500	shore	TSS1500-shore	chr12:4918273-4919657	NA	NA
cg24702147	-0.154469	0.376952	-11.2797	2.46488e-24	1.35046e-21	44.2988	0.31142	0.465888	0.154469	12	7071814	R	I	MIR141	TSS1500	opensea	TSS1500-opensea		NA	NA
cg14255981	-0.163891	0.546684	-11.2758	2.5385e-24	1.38658e-21	44.2696	0.477154	0.641046	0.163891	12	105414154	R	II	ALDH1L2	Body	opensea	Body-opensea		NA	TRUE
cg16058274	-0.170894	0.494521	-11.2729	2.59684e-24	1.4099e-21	44.2471	0.422021	0.592915	0.170894	14	94179847	R	II		IGR	opensea	IGR-opensea		NA	TRUE
cg02054513	-0.176311	0.672041	-11.2489	3.11882e-24	1.64272e-21	44.0652	0.597242	0.773553	0.176311	16	80319282	R	II		IGR	opensea	IGR-opensea		NA	TRUE			rs78621654
cg18497508	0.158265	0.490712	11.2336	3.50805e-24	1.83551e-21	43.9484	0.557855	0.39959	-0.158265	6	41528345	F	II	FOXP4	5'UTR	island	5'UTR-island	chr6:41528266-41528900	TRUE	TRUE
cg17820022	-0.155125	0.440597	-11.2309	3.58049e-24	1.8626e-21	43.9281	0.374787	0.529911	0.155125	1	2425860	R	I	PLCH2	Body	opensea	Body-opensea		NA	NA
cg16306654	0.170983	0.383726	11.2263	3.70758e-24	1.92316e-21	43.8935	0.456264	0.285282	-0.170983	1	6419767	R	II	ACOT7	Body	opensea	Body-opensea		TRUE	TRUE
cg21576886	-0.189467	0.472712	-11.2195	3.90815e-24	2.01273e-21	43.8412	0.392332	0.581799	0.189467	1	158900088	R	II	PYHIN1	TSS1500	opensea	TSS1500-opensea		NA	NA
cg01017395	-0.163406	0.420418	-11.2132	4.09887e-24	2.10494e-21	43.7939	0.351094	0.5145	0.163406	1	12609957	R	II		IGR	opensea	IGR-opensea		TRUE	TRUE
cg12589308	-0.182038	0.717461	-11.1872	5.00165e-24	2.52538e-21	43.5963	0.640233	0.82227	0.182038	19	1811438	F	I	ATP8B3	Body	shore	Body-shore	chr19:1811954-1812337	NA	NA		rs45535339
cg07917546	-0.194019	0.443885	-11.1023	9.56055e-24	4.46454e-21	42.9531	0.361575	0.555593	0.194019	16	86496223	F	I		IGR	opensea	IGR-opensea		NA	TRUE
cg27534624	-0.151813	0.470402	-11.0755	1.17308e-23	5.36678e-21	42.75	0.405996	0.557809	0.151813	12	7072727	R	II	MIR141	TSS1500	opensea	TSS1500-opensea		NA	NA
cg02190353	-0.162169	0.420112	-11.0751	1.17624e-23	5.37438e-21	42.7473	0.351313	0.513483	0.162169	8	23405296	F	II	SLC25A37	Body	opensea	Body-opensea		TRUE	TRUE
cg11611448	-0.167245	0.505786	-11.0649	1.27106e-23	5.7638e-21	42.6704	0.434834	0.602079	0.167245	2	127453782	F	II	GYPC	3'UTR	opensea	3'UTR-opensea		NA	NA
cg27089675	0.174829	0.5061	11.0396	1.54147e-23	6.80179e-21	42.4789	0.58027	0.405441	-0.174829	10	123838499	R	II	TACC2	Body	opensea	Body-opensea		NA	TRUE
cg04730794	-0.180148	0.50732	-10.9994	2.09293e-23	9.07954e-21	42.1753	0.430893	0.611042	0.180148	5	169144438	R	II	DOCK2	Body	opensea	Body-opensea		NA	TRUE
cg07598052	0.155118	0.622321	10.9729	2.55804e-23	1.09264e-20	41.9761	0.688129	0.533011	-0.155118	20	35274639	F	I	SLA2	TSS200	opensea	TSS200-opensea		NA	TRUE		rs221309
cg01395254	-0.183552	0.49221	-10.9578	2.87028e-23	1.21592e-20	41.8618	0.41434	0.597892	0.183552	2	2336428	R	II	MYT1L	TSS1500	opensea	TSS1500-opensea		NA	NA
cg01607932	-0.168128	0.552988	-10.9539	2.95471e-23	1.24583e-20	41.8331	0.481661	0.649789	0.168128	3	5027597	R	II		IGR	shore	IGR-shore	chr3:5028409-5028903	NA	TRUE
cg02420480	-0.154379	0.380623	-10.9503	3.03641e-23	1.27339e-20	41.806	0.315129	0.469508	0.154379	7	41919892	F	II		IGR	opensea	IGR-opensea		NA	TRUE
cg10216717	-0.156589	0.438993	-10.9428	3.21543e-23	1.33546e-20	41.7491	0.372562	0.529151	0.156589	12	128899290	R	II	TMEM132C	Body	shore	Body-shore	chr12:128899813-128900065	NA	NA
cg22338446	0.155711	0.539638	10.9235	3.72274e-23	1.52334e-20	41.6037	0.605697	0.449986	-0.155711	19	42390475	F	II	ARHGEF1	5'UTR	shore	5'UTR-shore	chr19:42388144-42388723	NA	NA
cg08875705	0.162614	0.615575	10.9185	3.86447e-23	1.57242e-20	41.5667	0.684562	0.521948	-0.162614	12	6665330	R	I	IFFO1	TSS200	island	TSS200-island	chr12:6664425-6665336	NA	NA		rs11064253
cg21049397	-0.160158	0.406086	-10.9168	3.9151e-23	1.59122e-20	41.5537	0.33814	0.498298	0.160158	12	25611175	F	II		IGR	opensea	IGR-opensea		TRUE	TRUE
cg08402365	0.184124	0.57105	10.9057	4.2582e-23	1.71712e-20	41.4704	0.649163	0.465039	-0.184124	2	172945274	R	I	MAP1D	3'UTR	island	3'UTR-island	chr2:172944988-172945384	NA	NA
cg25414639	-0.173535	0.593196	-10.9051	4.27749e-23	1.72297e-20	41.4659	0.519576	0.69311	0.173535	15	88360194	R	II		IGR	opensea	IGR-opensea		TRUE	TRUE
cg14656153	-0.159061	0.504457	-10.8934	4.67488e-23	1.87257e-20	41.3777	0.436976	0.596037	0.159061	6	37505970	F	II		IGR	shore	IGR-shore	chr6:37503538-37504291	TRUE	NA
cg11081307	-0.197882	0.55428	-10.859	6.06435e-23	2.35049e-20	41.1195	0.47033	0.668212	0.197882	20	57770619	R	I	ZNF831	Body	shelf	Body-shelf	chr20:57766396-57767896	NA	NA
cg18518916	0.150249	0.502528	10.8387	7.06822e-23	2.7079e-20	40.9674	0.56627	0.416021	-0.150249	4	185456125	R	II		IGR	opensea	IGR-opensea		NA	TRUE
cg13220569	-0.168984	0.534057	-10.8366	7.18546e-23	2.74697e-20	40.9511	0.462367	0.631351	0.168984	12	5155343	F	II	KCNA5	3'UTR	shore	3'UTR-shore	chr12:5153012-5154346	NA	NA
cg15697852	-0.200985	0.53102	-10.8279	7.67206e-23	2.92061e-20	40.8861	0.445754	0.646739	0.200985	5	140098576	R	II	VTRNA1-2	Body	opensea	Body-opensea		TRUE	NA
cg14857764	0.154366	0.545431	10.8129	8.59006e-23	3.22898e-20	40.7739	0.610919	0.456553	-0.154366	13	50706663	F	II		IGR	shore	IGR-shore	chr13:50707585-50708019	NA	NA
cg07134266	-0.17921	0.628218	-10.7956	9.79009e-23	3.63105e-20	40.6442	0.552189	0.7314	0.17921	13	112886222	F	II		IGR	opensea	IGR-opensea		NA	NA		rs59117233
cg01070987	-0.21154	0.549367	-10.7784	1.11455e-22	4.064e-20	40.5155	0.459622	0.671162	0.21154	3	149687002	R	II	PFN2	Body	shore	Body-shore	chr3:149687877-149689537	NA	NA
cg26226546	-0.15525	0.484649	-10.7784	1.11491e-22	4.064e-20	40.5152	0.418785	0.574035	0.15525	7	103088199	R	II		IGR	shore	IGR-shore	chr7:103086344-103086840	NA	NA
cg20542822	-0.186623	0.639624	-10.7629	1.25257e-22	4.4842e-20	40.3996	0.560451	0.747073	0.186623	3	130098334	R	II	COL29A1	Body	opensea	Body-opensea		NA	NA
cg03124318	0.156171	0.626733	10.749	1.3911e-22	4.91666e-20	40.2956	0.692987	0.536816	-0.156171	12	109491989	R	II	USP30	Body	shore	Body-shore	chr12:109490238-109490673	NA	NA
cg08462127	-0.178676	0.609128	-10.7482	1.40008e-22	4.9387e-20	40.2892	0.533326	0.712002	0.178676	8	2017365	R	II	MYOM2	Body	opensea	Body-opensea		NA	NA
cg02079551	-0.175424	0.586661	-10.7459	1.42395e-22	5.00232e-20	40.2724	0.512238	0.687662	0.175424	10	107023377	R	II	SORCS3	3'UTR	opensea	3'UTR-opensea		NA	TRUE
cg05721476	0.170564	0.565287	10.7458	1.42505e-22	5.00232e-20	40.2716	0.637648	0.467084	-0.170564	10	46076550	F	II	2021-03-08	5'UTR	opensea	5'UTR-opensea		NA	TRUE
cg08899593	-0.173554	0.67204	-10.7319	1.58227e-22	5.46375e-20	40.1678	0.598411	0.771965	0.173554	12	132892613	R	I	GALNT9	Body	shelf	Body-shelf	chr12:132896299-132896569	TRUE	NA
cg01715680	-0.154458	0.56752	-10.7318	1.58429e-22	5.46551e-20	40.1665	0.501993	0.656451	0.154458	14	93725377	R	II	BTBD7	Body	opensea	Body-opensea		NA	TRUE
cg08079376	-0.182992	0.663242	-10.6941	2.104e-22	7.04929e-20	39.885	0.585609	0.768601	0.182992	16	65700026	F	II		IGR	opensea	IGR-opensea		NA	TRUE		rs77490325
cg11838224	0.160911	0.453155	10.6737	2.45196e-22	7.99948e-20	39.7332	0.52142	0.360509	-0.160911	17	7287740	R	II	TNK1	Body	island	Body-island	chr17:7287198-7287940	NA	NA
cg12176793	-0.181443	0.463072	-10.6706	2.51014e-22	8.15978e-20	39.7099	0.386096	0.567539	0.181443	8	90624127	R	II		IGR	opensea	IGR-opensea		TRUE	TRUE
cg25947619	0.21808	0.468911	10.6637	2.6424e-22	8.50533e-20	39.659	0.56143	0.343349	-0.21808	15	86233220	F	I	AKAP13	Body	opensea	Body-opensea		NA	TRUE	low-CpG:84034147-84034259
cg22451100	-0.157137	0.602733	-10.6579	2.76095e-22	8.86318e-20	39.6154	0.536069	0.693206	0.157137	2	178107899	R	II	NFE2L2	Body	opensea	Body-opensea		NA	TRUE
cg11118778	-0.153273	0.463912	-10.6516	2.89471e-22	9.22686e-20	39.5685	0.398887	0.55216	0.153273	12	80086054	F	II	PAWR	TSS1500	shore	TSS1500-shore	chr12:80083531-80085154	NA	NA
cg22561592	-0.1552	0.455419	-10.6514	2.89824e-22	9.22993e-20	39.5673	0.389576	0.544776	0.1552	15	88320395	R	II		IGR	opensea	IGR-opensea		TRUE	TRUE
cg13505905	-0.151157	0.499308	-10.646	3.01887e-22	9.56343e-20	39.5268	0.435181	0.586338	0.151157	10	106784819	F	II	SORCS3	Body	opensea	Body-opensea		NA	TRUE
cg05180522	-0.153848	0.618257	-10.6117	3.90433e-22	1.21443e-19	39.2717	0.552988	0.706837	0.153848	14	98101740	F	II		IGR	opensea	IGR-opensea		NA	NA
cg05828624	-0.17564	0.574104	-10.5909	4.56376e-22	1.39547e-19	39.1168	0.49959	0.67523	0.17564	2	79347699	F	II	REG1A	5'UTR	opensea	5'UTR-opensea		NA	NA		rs283890	rs74903273
cg04915044	0.240764	0.408305	10.5883	4.6539e-22	1.41344e-19	39.0974	0.510447	0.269683	-0.240764	2	86263895	F	II	POLR1A	Body	opensea	Body-opensea		TRUE	TRUE		rs3770088
cg14216734	-0.204019	0.557942	-10.5787	5.00143e-22	1.50253e-19	39.026	0.471388	0.675407	0.204019	1	158817808	F	II	MNDA	Body	opensea	Body-opensea		NA	NA
cg06741653	-0.168801	0.55132	-10.5763	5.08942e-22	1.52389e-19	39.0087	0.479707	0.648509	0.168801	12	4351720	F	II		IGR	opensea	IGR-opensea		NA	TRUE
cg00591421	-0.165481	0.671571	-10.5737	5.19127e-22	1.55181e-19	38.989	0.601367	0.766848	0.165481	10	106468736	R	II	SORCS3	Body	opensea	Body-opensea		NA	TRUE
cg08011645	-0.197983	0.619779	-10.5688	5.38628e-22	1.60478e-19	38.9524	0.535787	0.73377	0.197983	11	64488701	R	I	NRXN2	5'UTR	shore	5'UTR-shore	chr11:64490493-64491146	NA	NA
cg07974511	0.167475	0.629089	10.5556	5.94352e-22	1.75485e-19	38.8548	0.700138	0.532664	-0.167475	2	63283013	F	I	OTX1	Body	island	Body-island	chr2:63282514-63283122	NA	TRUE		rs61742369
cg15023513	-0.152923	0.481692	-10.5489	6.24847e-22	1.8299e-19	38.8052	0.416815	0.569739	0.152923	15	87667171	F	II		IGR	opensea	IGR-opensea		NA	NA
cg25510609	0.206332	0.416691	10.5478	6.30014e-22	1.84054e-19	38.797	0.504226	0.297893	-0.206332	15	86233236	F	I	AKAP13	Body	opensea	Body-opensea		NA	TRUE	low-CpG:84034147-84034259
cg18043773	-0.158358	0.628198	-10.545	6.4362e-22	1.87725e-19	38.7758	0.561016	0.719374	0.158358	6	32974906	R	II	HLA-DOA	Body	shore	Body-shore	chr6:32975684-32975926	NA	NA			rs79996595
cg10603481	-0.176698	0.605105	-10.5256	7.43744e-22	2.13985e-19	38.6324	0.530142	0.70684	0.176698	12	132885871	F	I	GALNT9	Body	shore	Body-shore	chr12:132885388-132885592	NA	NA
cg26738880	-0.168203	0.509097	-10.521	7.70023e-22	2.20315e-19	38.5979	0.437738	0.605941	0.168203	7	154429032	R	II	DPP6	Body	opensea	Body-opensea		NA	NA
cg08010865	0.155364	0.617277	10.5209	7.70675e-22	2.20327e-19	38.5971	0.683189	0.527825	-0.155364	13	24807902	F	II	SPATA13	Body	opensea	Body-opensea		NA	TRUE		rs78917089
cg18437633	-0.150915	0.592412	-10.4842	1.01373e-21	2.80473e-19	38.3252	0.528388	0.679303	0.150915	2	161056639	R	II	ITGB6	TSS200	opensea	TSS200-opensea		NA	NA
cg23304605	0.178126	0.584435	10.4623	1.19312e-21	3.24135e-19	38.1636	0.660004	0.481878	-0.178126	14	91866373	F	I	CCDC88C	Body	opensea	Body-opensea		NA	NA
cg01489419	-0.167886	0.558205	-10.4617	1.199e-21	3.25487e-19	38.1587	0.486981	0.654867	0.167886	16	26293057	F	II		IGR	opensea	IGR-opensea		NA	TRUE			rs73518557
cg18103859	0.190481	0.624395	10.4456	1.3519e-21	3.62086e-19	38.0396	0.705205	0.514724	-0.190481	14	61110002	F	II		IGR	shore	IGR-shore	chr14:61108954-61109786	NA	NA
cg18126060	-0.169788	0.484902	-10.4382	1.42814e-21	3.78566e-19	37.9852	0.412871	0.582658	0.169788	12	4923430	R	II	KCNA6	3'UTR	shelf	3'UTR-shelf	chr12:4918273-4919657	NA	NA
cg05341539	0.174512	0.522817	10.4326	1.48863e-21	3.93158e-19	37.9441	0.596852	0.42234	-0.174512	15	86233214	R	II	AKAP13	Body	opensea	Body-opensea		NA	TRUE	low-CpG:84034147-84034259
cg05513274	-0.167506	0.522542	-10.4303	1.51422e-21	3.99329e-19	37.9272	0.451479	0.618984	0.167506	12	114212759	R	II		IGR	opensea	IGR-opensea		NA	NA
cg10821813	-0.181638	0.636313	-10.4295	1.52421e-21	4.01376e-19	37.9207	0.559254	0.740893	0.181638	10	129562528	R	II		IGR	opensea	IGR-opensea		NA	TRUE
cg04910082	-0.154388	0.569214	-10.4275	1.54614e-21	4.06854e-19	37.9065	0.503716	0.658104	0.154388	22	43463123	F	II	TTLL1	Body	opensea	Body-opensea		TRUE	NA
cg03276000	-0.196169	0.50345	-10.4171	1.67087e-21	4.37124e-19	37.8295	0.420227	0.616396	0.196169	7	154087975	F	II	DPP6	Body	opensea	Body-opensea		NA	NA
cg05174942	-0.213151	0.503906	-10.4125	1.72946e-21	4.50802e-19	37.7954	0.413478	0.626629	0.213151	5	140098392	R	II	VTRNA1-2	TSS200	opensea	TSS200-opensea		TRUE	NA			rs73273339
cg20703928	0.164326	0.627605	10.4085	1.78199e-21	4.63504e-19	37.7657	0.697319	0.532993	-0.164326	2	106364229	F	II	NCK2	5'UTR	shelf	5'UTR-shelf	chr2:106361032-106362218	NA	NA
cg08629856	-0.155281	0.603065	-10.4082	1.78609e-21	4.64236e-19	37.7634	0.537188	0.692469	0.155281	10	132913153	F	II	TCERG1L	Body	opensea	Body-opensea		NA	NA
cg18385570	-0.171713	0.614282	-10.4034	1.84989e-21	4.79092e-19	37.7286	0.541434	0.713147	0.171713	19	15052282	F	II	OR7C2	TSS200	opensea	TSS200-opensea		NA	NA		rs34752297
cg00218792	-0.154999	0.574092	-10.3981	1.92455e-21	4.94871e-19	37.6894	0.508335	0.663333	0.154999	15	81468599	R	II		IGR	opensea	IGR-opensea		NA	NA
cg16042259	0.151751	0.513176	10.3808	2.1886e-21	5.57993e-19	37.5618	0.577555	0.425804	-0.151751	6	100917206	R	II		IGR	island	IGR-island	chr6:100917205-100917523	NA	NA		rs79933433
cg14909201	-0.197301	0.5058	-10.3798	2.20496e-21	5.60973e-19	37.5545	0.422097	0.619398	0.197301	13	111748020	R	I		IGR	shelf	IGR-shelf	chr13:111745493-111745697	NA	NA
cg08884410	-0.173999	0.537631	-10.3756	2.27594e-21	5.77402e-19	37.523	0.463814	0.637813	0.173999	7	152620090	R	II		IGR	shore	IGR-shore	chr7:152621916-152622149	NA	NA
cg14600345	-0.174154	0.598939	-10.3688	2.39277e-21	6.04913e-19	37.4734	0.525056	0.69921	0.174154	10	111213963	F	II		IGR	shelf	IGR-shelf	chr10:111216604-111217083	NA	NA
cg01819142	-0.198393	0.612716	-10.3505	2.74251e-21	6.79977e-19	37.3381	0.52855	0.726943	0.198393	8	139064307	R	II		IGR	opensea	IGR-opensea		NA	NA
cg07451946	-0.177754	0.609904	-10.3502	2.74778e-21	6.8035e-19	37.3362	0.534494	0.712247	0.177754	10	2337473	R	II		IGR	opensea	IGR-opensea		NA	TRUE
cg00501006	-0.154915	0.698727	-10.3345	3.08674e-21	7.55968e-19	37.2208	0.633005	0.78792	0.154915	15	25480975	R	II	SNORD115-29	TSS1500	opensea	TSS1500-opensea		NA	NA
cg12620035	-0.15865	0.445463	-10.3149	3.57121e-21	8.58865e-19	37.0763	0.378156	0.536807	0.15865	7	73247613	R	I		IGR	shore	IGR-shore	chr7:73245434-73246045	NA	NA
cg22743884	-0.164225	0.464879	-10.3088	3.73453e-21	8.93374e-19	37.0319	0.395208	0.559433	0.164225	8	11839844	R	II	DEFB135	1stExon	opensea	1stExon-opensea		NA	NA
cg01181150	-0.161927	0.528712	-10.3045	3.85609e-21	9.17585e-19	37.0002	0.460016	0.621943	0.161927	7	154407878	R	II	DPP6	Body	opensea	Body-opensea		NA	NA
cg05492975	-0.183481	0.536955	-10.303	3.89986e-21	9.26165e-19	36.989	0.459114	0.642595	0.183481	20	60119508	R	II	CDH4	Body	island	Body-island	chr20:60119507-60119712	NA	NA
cg15351214	-0.156484	0.506973	-10.2982	4.0405e-21	9.57044e-19	36.9538	0.440586	0.59707	0.156484	14	71277192	F	II	MAP3K9	TSS1500	shore	TSS1500-shore	chr14:71275512-71276571	NA	NA
cg03952361	-0.169463	0.650965	-10.2941	4.16597e-21	9.85467e-19	36.9235	0.579071	0.748534	0.169463	12	132870378	R	I	GALNT9	Body	shore	Body-shore	chr12:132872343-132872586	NA	NA
cg16711011	-0.180369	0.596194	-10.2925	4.21394e-21	9.96162e-19	36.9122	0.519674	0.700043	0.180369	2	568198	F	I		IGR	opensea	IGR-opensea		NA	NA
cg07189394	-0.168121	0.579581	-10.2884	4.34575e-21	1.02129e-18	36.8816	0.508257	0.676378	0.168121	3	131802515	F	II		IGR	opensea	IGR-opensea		NA	TRUE		rs77034109
cg24258712	-0.276355	0.637622	-10.2876	4.37151e-21	1.02534e-18	36.8758	0.52038	0.796735	0.276355	8	144236525	F	I		IGR	opensea	IGR-opensea		NA	NA
cg09170112	-0.244382	0.551573	-10.2737	4.84323e-21	1.12356e-18	36.7742	0.447896	0.692278	0.244382	12	132102188	R	I		IGR	opensea	IGR-opensea		NA	NA
cg17478979	-0.154563	0.412534	-10.2721	4.90189e-21	1.1357e-18	36.7622	0.346961	0.501525	0.154563	6	149772150	R	I	ZC3H12D	Body	island	Body-island	chr6:149771836-149772855	TRUE	TRUE
cg14840848	-0.218116	0.486566	-10.2704	4.96481e-21	1.14733e-18	36.7496	0.394032	0.612148	0.218116	13	112927276	R	I		IGR	opensea	IGR-opensea		NA	NA
cg26531231	-0.170008	0.532191	-10.2658	5.1374e-21	1.18494e-18	36.7157	0.460066	0.630074	0.170008	4	40336255	R	II	CHRNA9	TSS1500	opensea	TSS1500-opensea		TRUE	TRUE
cg14255337	0.158497	0.554797	10.262	5.28406e-21	1.2141e-18	36.6878	0.622038	0.463541	-0.158497	12	121972602	R	II	KDM2B	Body	shelf	Body-shelf	chr12:121975028-121976140	NA	NA			rs78794423
cg13427473	-0.166921	0.669748	-10.2567	5.49252e-21	1.25559e-18	36.6494	0.598933	0.765854	0.166921	15	88406836	R	II		IGR	opensea	IGR-opensea		NA	NA
cg26081974	-0.166785	0.538893	-10.2561	5.51931e-21	1.26013e-18	36.6446	0.468136	0.63492	0.166785	13	114065897	F	I		IGR	shore	IGR-shore	chr13:114066946-114067488	TRUE	TRUE
cg13167263	-0.171034	0.661398	-10.2556	5.53918e-21	1.26386e-18	36.641	0.588838	0.759872	0.171034	10	110668321	F	II		IGR	shelf	IGR-shelf	chr10:110671724-110672326	NA	NA		rs58516403	rs12571448
cg16167060	-0.158212	0.536032	-10.2523	5.6769e-21	1.28957e-18	36.6167	0.468911	0.627123	0.158212	2	235934945	R	II	SH3BP4	5'UTR	opensea	5'UTR-opensea		TRUE	TRUE		rs61260198
cg06520521	0.211586	0.376969	10.2517	5.70058e-21	1.29269e-18	36.6125	0.466733	0.255147	-0.211586	11	62323216	F	II		IGR	opensea	IGR-opensea		NA	TRUE
cg20335425	-0.1742	0.462514	-10.246	5.94488e-21	1.34031e-18	36.5709	0.388611	0.562811	0.1742	1	153363264	R	I	S100A8	5'UTR	opensea	5'UTR-opensea		NA	NA
cg16257533	-0.183283	0.511885	-10.2456	5.96426e-21	1.34384e-18	36.5677	0.434129	0.617412	0.183283	11	131934835	F	II	NTM	Body	opensea	Body-opensea		TRUE	TRUE
cg10636490	-0.181934	0.512957	-10.2443	6.02231e-21	1.35523e-18	36.5581	0.435773	0.617707	0.181934	3	149687315	F	II	PFN2	Body	shore	Body-shore	chr3:149687877-149689537	NA	NA
cg22010957	-0.182845	0.551583	-10.2406	6.18825e-21	1.39083e-18	36.5312	0.474012	0.656857	0.182845	8	49888988	F	I		IGR	shore	IGR-shore	chr8:49890386-49890874	NA	NA
cg07467482	-0.174846	0.496532	-10.2034	8.14842e-21	1.7901e-18	36.2583	0.422355	0.5972	0.174846	7	154006066	F	II	DPP6	Body	shelf	Body-shelf	chr7:154001964-154002281	NA	TRUE
cg26522946	0.19825	0.4178	10.1996	8.37971e-21	1.83197e-18	36.2306	0.501906	0.303656	-0.19825	10	70847350	F	II	SRGN	TSS1500	opensea	TSS1500-opensea		NA	NA
cg00997853	-0.186174	0.568289	-10.1916	8.88554e-21	1.92969e-18	36.1725	0.489306	0.67548	0.186174	12	26844579	F	II	ITPR2	Body	opensea	Body-opensea		TRUE	TRUE		rs78888635
cg21292033	0.168041	0.356144	10.1893	9.04073e-21	1.95749e-18	36.1553	0.427434	0.259393	-0.168041	17	75462189	F	II	2021-09-09	Body	opensea	Body-opensea		TRUE	TRUE		rs77126096	rs72887165
cg09613887	-0.169762	0.65331	-10.1759	9.97889e-21	2.13752e-18	36.0574	0.58129	0.751052	0.169762	15	25475940	R	I	SNORD115-15	Body	opensea	Body-opensea		NA	NA
cg12555810	-0.152475	0.443139	-10.1713	1.03211e-20	2.20428e-18	36.024	0.378453	0.530928	0.152475	12	119187794	R	II		IGR	opensea	IGR-opensea		NA	TRUE
cg19362874	-0.162493	0.383122	-10.1646	1.08471e-20	2.30323e-18	35.9747	0.314186	0.476679	0.162493	6	3053558	R	I		IGR	opensea	IGR-opensea		NA	TRUE
cg08080145	-0.178481	0.548201	-10.1637	1.09138e-20	2.31307e-18	35.9686	0.472482	0.650963	0.178481	17	72666670	R	II	RAB37	TSS1500	shore	TSS1500-shore	chr17:72667195-72667710	NA	NA
cg26716753	-0.182045	0.574657	-10.1635	1.09294e-20	2.31498e-18	35.9672	0.497426	0.679471	0.182045	12	126105989	F	II	TMEM132B	Body	opensea	Body-opensea		NA	NA
cg17120607	-0.165344	0.52014	-10.1614	1.11054e-20	2.34675e-18	35.9514	0.449994	0.615338	0.165344	12	126020727	F	II	TMEM132B	Body	shelf	Body-shelf	chr12:126018100-126018365	NA	NA
cg03567262	-0.151166	0.525519	-10.1611	1.11309e-20	2.35035e-18	35.9491	0.461388	0.612554	0.151166	12	108657870	R	II		IGR	opensea	IGR-opensea		NA	TRUE
cg25356715	-0.201838	0.487395	-10.1609	1.11477e-20	2.35156e-18	35.9476	0.401766	0.603604	0.201838	12	1904796	F	I	CACNA2D4	Body	shore	Body-shore	chr12:1905277-1906765	NA	NA
cg05754905	-0.164371	0.51978	-10.16	1.12147e-20	2.36293e-18	35.9417	0.450046	0.614417	0.164371	1	160992352	R	II	F11R	TSS1500	shore	TSS1500-shore	chr1:160990718-160991225	NA	NA
cg00091960	-0.154688	0.569987	-10.1553	1.1612e-20	2.43807e-18	35.9072	0.504362	0.65905	0.154688	7	126829514	R	II	GRM8	Body	opensea	Body-opensea		NA	TRUE
cg27662750	-0.161924	0.651711	-10.153	1.18098e-20	2.47097e-18	35.8904	0.583016	0.744939	0.161924	16	65606213	F	II	LOC283867	Body	opensea	Body-opensea		TRUE	TRUE
cg09765297	-0.151337	0.546275	-10.1455	1.24834e-20	2.59847e-18	35.8354	0.482071	0.633409	0.151337	16	83029415	F	II	CDH13	Body	opensea	Body-opensea		NA	TRUE		rs61696909
cg10671180	-0.157482	0.591296	-10.1414	1.28675e-20	2.66401e-18	35.8054	0.524485	0.681967	0.157482	15	25486849	R	II	SNORD115-39	TSS200	opensea	TSS200-opensea		NA	NA		rs55820639
cg20232986	0.162005	0.489665	10.1348	1.35027e-20	2.78001e-18	35.7576	0.558394	0.396389	-0.162005	6	100915767	F	II		IGR	island	IGR-island	chr6:100915602-100915883	NA	NA			rs76547517
cg12369091	-0.150163	0.53583	-10.1312	1.38643e-20	2.84794e-18	35.7314	0.472124	0.622287	0.150163	12	108495363	F	II		IGR	opensea	IGR-opensea		NA	TRUE		rs77481844
cg23822732	-0.173412	0.565148	-10.1294	1.40483e-20	2.87754e-18	35.7183	0.491579	0.664992	0.173412	2	2692854	F	II		IGR	opensea	IGR-opensea		NA	NA
cg25199385	-0.191683	0.629551	-10.1244	1.45776e-20	2.97077e-18	35.6817	0.548231	0.739915	0.191683	12	131246067	R	I		IGR	opensea	IGR-opensea		NA	NA
cg08822494	-0.156881	0.600285	-10.1211	1.49344e-20	3.03662e-18	35.6577	0.533729	0.69061	0.156881	15	88279757	R	II		IGR	opensea	IGR-opensea		NA	TRUE
cg01385669	-0.16849	0.581801	-10.1126	1.59045e-20	3.21033e-18	35.5953	0.51032	0.67881	0.16849	2	232230258	R	II		IGR	opensea	IGR-opensea		TRUE	TRUE
cg02710090	-0.154892	0.471962	-10.1098	1.62287e-20	3.26479e-18	35.5753	0.406251	0.561142	0.154892	1	207225128	F	II	PFKFB2	TSS1500	shore	TSS1500-shore	chr1:207226281-207226842	NA	NA
cg21320123	-0.177241	0.570208	-10.1066	1.66215e-20	3.33453e-18	35.5516	0.495015	0.672256	0.177241	7	153897058	R	II	DPP6	Body	opensea	Body-opensea		NA	TRUE
cg17399417	-0.188193	0.580312	-10.1049	1.68298e-20	3.37068e-18	35.5393	0.500473	0.688666	0.188193	12	132908739	F	II		IGR	shore	IGR-shore	chr12:132910476-132910802	NA	NA
cg20557603	-0.157418	0.549206	-10.0985	1.76348e-20	3.51434e-18	35.4929	0.482422	0.639841	0.157418	12	68873953	F	II		IGR	opensea	IGR-opensea		NA	TRUE
cg07612615	-0.157993	0.631189	-10.098	1.77022e-20	3.52581e-18	35.4892	0.564161	0.722154	0.157993	10	132684286	R	II		IGR	opensea	IGR-opensea		NA	NA
cg16013670	-0.158277	0.512321	-10.0895	1.88442e-20	3.74294e-18	35.4272	0.445173	0.60345	0.158277	1	241804175	F	II	OPN3	TSS1500	shore	TSS1500-shore	chr1:241802960-241803649	NA	NA		rs3834002
cg13205617	-0.165207	0.479098	-10.0869	1.9208e-20	3.80681e-18	35.4082	0.40901	0.574217	0.165207	2	2177531	F	II	MYT1L	5'UTR	opensea	5'UTR-opensea		NA	NA
cg22475859	-0.153099	0.547305	-10.0816	1.99712e-20	3.93427e-18	35.3696	0.482354	0.635453	0.153099	2	365090	F	II		IGR	opensea	IGR-opensea		NA	NA		rs60139398
cg25371919	0.164605	0.597143	10.0802	2.0169e-20	3.96457e-18	35.3598	0.666975	0.50237	-0.164605	2	63284481	R	I		IGR	shore	IGR-shore	chr2:63285949-63287097	NA	TRUE
cg09890332	-0.163969	0.643372	-10.0778	2.05284e-20	4.02644e-18	35.3423	0.573809	0.737778	0.163969	17	3212495	F	II	OR3A4	TSS1500	opensea	TSS1500-opensea		NA	NA
cg02485729	-0.155077	0.484485	-10.0681	2.20527e-20	4.302e-18	35.2713	0.418694	0.573772	0.155077	12	128994427	F	II	TMEM132C	Body	opensea	Body-opensea		NA	TRUE
cg12654045	-0.152462	0.505956	-10.0662	2.23651e-20	4.35587e-18	35.2574	0.441275	0.593737	0.152462	1	17559606	F	II	PADI1	Body	opensea	Body-opensea		TRUE	TRUE
cg06169746	0.168706	0.391202	10.0625	2.2969e-20	4.45664e-18	35.231	0.462775	0.294069	-0.168706	3	119419493	F	II		IGR	shelf	IGR-shelf	chr3:119421855-119422334	NA	NA			rs80173238
cg10259094	-0.152913	0.678119	-10.0463	2.58679e-20	4.9683e-18	35.1132	0.613247	0.76616	0.152913	15	35043704	R	II		IGR	shelf	IGR-shelf	chr15:35046443-35047480	NA	NA
cg03338209	-0.152474	0.355921	-10.0407	2.69529e-20	5.152e-18	35.0724	0.291235	0.443709	0.152474	22	37908796	F	I	CARD10	Body	shelf	Body-shelf	chr22:37911979-37912258	TRUE	TRUE
cg06829969	-0.155226	0.511184	-10.0384	2.74152e-20	5.2265e-18	35.0556	0.445331	0.600556	0.155226	1	10460205	R	II	PGD	Body	shore	Body-shore	chr1:10458548-10459997	NA	NA
cg10956848	-0.246124	0.6043	-10.0344	2.82298e-20	5.37044e-18	35.0266	0.499884	0.746008	0.246124	22	48027641	R	I		IGR	island	IGR-island	chr22:48027586-48027828	NA	NA
cg21296613	-0.172527	0.575083	-10.0325	2.86248e-20	5.43025e-18	35.0128	0.50189	0.674417	0.172527	20	57800725	R	II	ZNF831	Body	shelf	Body-shelf	chr20:57797223-57797441	NA	NA
cg15193614	-0.170507	0.526463	-10.0235	3.05901e-20	5.75869e-18	34.947	0.454127	0.624634	0.170507	5	2239477	R	II		IGR	opensea	IGR-opensea		NA	NA
cg15717907	-0.155027	0.592327	-10.0208	3.12014e-20	5.86458e-18	34.9274	0.526558	0.681585	0.155027	11	55704364	F	II	OR5I1	TSS1500	opensea	TSS1500-opensea		NA	NA
cg00471857	-0.159421	0.627258	-10.0065	3.46429e-20	6.44093e-18	34.8236	0.559625	0.719046	0.159421	7	154000016	F	II	DPP6	Body	shore	Body-shore	chr7:154001964-154002281	NA	NA
cg19429300	-0.16223	0.593315	-10.004	3.5278e-20	6.55224e-18	34.8056	0.52449	0.68672	0.16223	13	41114929	R	II		IGR	opensea	IGR-opensea		TRUE	TRUE
cg03973705	-0.178114	0.591487	-10.0014	3.59631e-20	6.6726e-18	34.7866	0.515923	0.694037	0.178114	16	24174850	F	II	PRKCB	Body	opensea	Body-opensea		NA	TRUE
cg09169356	-0.157269	0.406028	-9.99484	3.77202e-20	6.93791e-18	34.7393	0.339308	0.496577	0.157269	10	2323382	F	II		IGR	opensea	IGR-opensea		NA	TRUE		rs76846939
cg02482718	-0.20016	0.52536	-9.99367	3.80445e-20	6.97976e-18	34.7308	0.440443	0.640603	0.20016	1	4726759	R	I	AJAP1	Body	island	Body-island	chr1:4726576-4726867	NA	NA
cg09305491	-0.161064	0.719437	-9.98891	3.93921e-20	7.20134e-18	34.6963	0.651107	0.812171	0.161064	16	24151191	R	II	PRKCB	Body	opensea	Body-opensea		NA	TRUE
cg17277820	-0.157263	0.668053	-9.98574	4.03185e-20	7.35206e-18	34.6733	0.601336	0.758599	0.157263	12	128903403	R	II	TMEM132C	Body	shelf	Body-shelf	chr12:128899813-128900065	NA	NA
cg09966455	-0.200737	0.695509	-9.98103	4.17303e-20	7.57884e-18	34.6392	0.610348	0.811085	0.200737	20	61930265	R	I	COL20A1	Body	shelf	Body-shelf	chr20:61927194-61927482	NA	NA
cg23161999	0.198434	0.528683	9.96833	4.57895e-20	8.24131e-18	34.5472	0.612867	0.414434	-0.198434	2	162283189	R	I		IGR	shore	IGR-shore	chr2:162283581-162284677	TRUE	TRUE
cg26151206	-0.208067	0.574747	-9.96572	4.66723e-20	8.37094e-18	34.5282	0.486476	0.694543	0.208067	1	158390649	F	II	OR10K2	1stExon	opensea	1stExon-opensea		NA	NA		rs4143457
cg10322419	-0.157857	0.63339	-9.95617	5.00432e-20	8.9311e-18	34.4591	0.56642	0.724278	0.157857	1	4470956	R	II	LOC284661	TSS1500	opensea	TSS1500-opensea		NA	NA			rs12049284
cg21367256	-0.166443	0.467516	-9.95521	5.03968e-20	8.98532e-18	34.4522	0.396904	0.563347	0.166443	20	62795658	F	II	MYT1	TSS200	opensea	TSS200-opensea		NA	NA
cg03214622	-0.152995	0.59384	-9.95303	5.12056e-20	9.1205e-18	34.4364	0.528934	0.681928	0.152995	17	77115633	F	II	HRNBP3	5'UTR	opensea	5'UTR-opensea		NA	NA			rs2707018
cg05092362	-0.151215	0.55121	-9.94841	5.29644e-20	9.36436e-18	34.4029	0.487058	0.638273	0.151215	2	2581323	R	II		IGR	opensea	IGR-opensea		NA	NA
cg21188037	0.182492	0.504851	9.94636	5.37624e-20	9.47845e-18	34.3881	0.582272	0.399781	-0.182492	7	45018658	F	II	MYO1G	5'UTR	opensea	5'UTR-opensea		NA	NA	low-CpG:44985102-44985243
cg03564727	-0.216135	0.551714	-9.94414	5.4641e-20	9.60304e-18	34.372	0.46002	0.676155	0.216135	19	49577206	R	I	KCNA7	TSS1500	shore	TSS1500-shore	chr19:49575129-49576076	TRUE	NA
cg16791528	-0.161912	0.650776	-9.93358	5.90171e-20	1.03181e-17	34.2957	0.582086	0.743997	0.161912	2	79347532	R	II	REG1A	TSS200	opensea	TSS200-opensea		NA	NA
cg15808795	-0.167257	0.620184	-9.92133	6.45349e-20	1.1121e-17	34.2071	0.549227	0.716484	0.167257	2	240582510	R	II		IGR	opensea	IGR-opensea		NA	NA			rs74758217
cg17526441	-0.184825	0.595121	-9.92101	6.46874e-20	1.1142e-17	34.2048	0.51671	0.701535	0.184825	5	4856273	F	II		IGR	opensea	IGR-opensea		NA	TRUE
cg07569562	-0.180131	0.610289	-9.92049	6.49294e-20	1.1173e-17	34.2011	0.533869	0.714001	0.180131	2	130343885	R	II		IGR	shore	IGR-shore	chr2:130345043-130345356	NA	NA
cg06996389	-0.183399	0.613171	-9.91746	6.63798e-20	1.13718e-17	34.1792	0.535366	0.718765	0.183399	10	132546174	F	II		IGR	opensea	IGR-opensea		NA	NA
cg23068476	-0.183636	0.635067	-9.91569	6.72468e-20	1.15058e-17	34.1663	0.557161	0.740797	0.183636	12	2613703	R	II	CACNA1C	Body	opensea	Body-opensea		NA	NA
cg02086166	-0.188406	0.662057	-9.91322	6.84665e-20	1.16923e-17	34.1485	0.582127	0.770534	0.188406	12	5775618	F	II	ANO2	Body	opensea	Body-opensea		NA	TRUE		rs759090
cg13797468	-0.165511	0.561049	-9.91177	6.91963e-20	1.18058e-17	34.138	0.490832	0.656343	0.165511	3	98848062	R	II		IGR	opensea	IGR-opensea		TRUE	TRUE
cg13550670	-0.151612	0.541677	-9.90806	7.10926e-20	1.2095e-17	34.1112	0.477357	0.628969	0.151612	14	70547432	F	II	SLC8A3	Body	opensea	Body-opensea		NA	NA
cg22993667	-0.179798	0.748097	-9.90466	7.28749e-20	1.2369e-17	34.0867	0.671819	0.851617	0.179798	10	134912012	F	I	GPR123	Body	island	Body-island	chr10:134911976-134912483	NA	NA		rs4838795
cg03361164	0.157735	0.492622	9.89692	7.71006e-20	1.3031e-17	34.0308	0.55954	0.401805	-0.157735	6	100915805	R	II		IGR	island	IGR-island	chr6:100915602-100915883	NA	NA
cg20490031	-0.17295	0.571933	-9.89364	7.89693e-20	1.33032e-17	34.0071	0.49856	0.67151	0.17295	18	61143926	R	II	SERPINB5	TSS1500	opensea	TSS1500-opensea		NA	NA
cg08656837	-0.167073	0.570996	-9.89303	7.93203e-20	1.33527e-17	34.0027	0.500117	0.66719	0.167073	7	155744544	R	II		IGR	opensea	IGR-opensea		TRUE	TRUE
cg01932361	-0.157413	0.469948	-9.88768	8.24686e-20	1.38345e-17	33.9641	0.403167	0.56058	0.157413	16	86985993	F	II		IGR	opensea	IGR-opensea		TRUE	TRUE		rs68173841
cg14591001	-0.172128	0.527015	-9.88233	8.57441e-20	1.43506e-17	33.9255	0.45399	0.626119	0.172128	12	132690752	F	I	GALNT9	Body	shore	Body-shore	chr12:132689880-132690197	TRUE	NA
cg18786237	-0.183485	0.698275	-9.88072	8.67551e-20	1.45063e-17	33.9139	0.620433	0.803918	0.183485	8	1182281	R	I		IGR	shelf	IGR-shelf	chr8:1185092-1185445	NA	NA
cg06422883	0.154979	0.474666	9.87613	8.97032e-20	1.49438e-17	33.8808	0.540414	0.385436	-0.154979	5	72528296	R	II		IGR	shore	IGR-shore	chr5:72529099-72529976	NA	TRUE
cg17551002	-0.169281	0.472002	-9.87076	9.32841e-20	1.54903e-17	33.842	0.400186	0.569467	0.169281	1	158517849	F	II	OR6Y1	1stExon	opensea	1stExon-opensea		NA	NA		rs35572510
cg18405691	-0.176686	0.640433	-9.86734	9.56299e-20	1.58433e-17	33.8174	0.565476	0.742162	0.176686	11	55322753	R	II	OR4C15	1stExon	opensea	1stExon-opensea		NA	NA
cg25282652	-0.183795	0.535996	-9.8642	9.78411e-20	1.61948e-17	33.7947	0.458022	0.641817	0.183795	12	128364739	R	II		IGR	opensea	IGR-opensea		NA	NA
cg12820134	-0.157061	0.600603	-9.86084	1.00263e-19	1.65425e-17	33.7705	0.533972	0.691032	0.157061	12	129592903	R	II	TMEM132D	Body	opensea	Body-opensea		NA	NA
cg27137084	-0.150918	0.500962	-9.85478	1.04781e-19	1.72092e-17	33.7268	0.436936	0.587854	0.150918	12	129035348	R	II	TMEM132C	Body	opensea	Body-opensea		NA	TRUE
cg01783662	0.154951	0.541743	9.85411	1.0529e-19	1.72831e-17	33.722	0.60748	0.452529	-0.154951	3	181442676	R	II	SOX2OT	Body	shore	Body-shore	chr3:181444409-181445000	NA	TRUE
cg02766941	-0.175758	0.605913	-9.85406	1.05327e-19	1.72831e-17	33.7217	0.531349	0.707107	0.175758	12	126676790	R	II		IGR	shore	IGR-shore	chr12:126675561-126676195	NA	NA
cg02788731	-0.16013	0.562355	-9.8538	1.05529e-19	1.73084e-17	33.7198	0.494421	0.654551	0.16013	1	247751498	F	II	OR2G2	TSS200	opensea	TSS200-opensea		NA	NA		rs41268349
cg05916059	-0.161804	0.52213	-9.85297	1.06171e-19	1.7382e-17	33.7138	0.453485	0.61529	0.161804	16	26146070	R	II	HS3ST4	Body	opensea	Body-opensea		NA	TRUE
cg20170223	0.151828	0.572389	9.8501	1.08404e-19	1.77153e-17	33.6931	0.636801	0.484973	-0.151828	20	34356200	R	II		IGR	shelf	IGR-shelf	chr20:34359673-34360250	NA	TRUE
cg12921481	-0.182404	0.577884	-9.848	1.10077e-19	1.79422e-17	33.678	0.5005	0.682904	0.182404	1	158747277	F	II	OR6N2	1stExon	opensea	1stExon-opensea		NA	NA
cg12848417	-0.151513	0.583075	-9.84731	1.10629e-19	1.80218e-17	33.673	0.518797	0.67031	0.151513	10	108576571	F	II	SORCS1	Body	opensea	Body-opensea		NA	TRUE		rs75520309
cg24374505	-0.150981	0.686409	-9.83988	1.16765e-19	1.8892e-17	33.6195	0.622356	0.773337	0.150981	17	10437854	F	II	MYH2	Body	opensea	Body-opensea		NA	NA		rs76562873
cg26859593	-0.225286	0.752003	-9.83909	1.17437e-19	1.8985e-17	33.6138	0.656427	0.881713	0.225286	13	112996532	F	I		IGR	shore	IGR-shore	chr13:112997192-112997717	NA	NA
cg17025555	-0.192533	0.548508	-9.83419	1.21695e-19	1.95506e-17	33.5786	0.466828	0.65936	0.192533	1	158724362	R	II	OR6K6	TSS1500	opensea	TSS1500-opensea		NA	NA
cg04685228	0.218373	0.418617	9.83173	1.23893e-19	1.98772e-17	33.5608	0.51126	0.292887	-0.218373	5	172462626	F	II		IGR	opensea	IGR-opensea		NA	TRUE
cg22911200	-0.156819	0.445598	-9.83107	1.24481e-19	1.9961e-17	33.5561	0.379068	0.535888	0.156819	8	139124425	R	II		IGR	opensea	IGR-opensea		NA	TRUE
cg13058786	-0.16472	0.581829	-9.82745	1.278e-19	2.04313e-17	33.5301	0.511948	0.676668	0.16472	17	77097868	F	I	HRNBP3	Body	shelf	Body-shelf	chr17:77099995-77100203	NA	NA
cg24088496	0.168424	0.545514	9.82373	1.31297e-19	2.09069e-17	33.5033	0.616967	0.448543	-0.168424	11	96071506	F	II	MAML2	Body	opensea	Body-opensea		NA	TRUE
cg21624282	-0.169674	0.66078	-9.82132	1.33618e-19	2.12671e-17	33.4859	0.588797	0.758471	0.169674	13	113030783	R	II	C13orf28	1stExon	opensea	1stExon-opensea		NA	NA			rs80048274
cg12072740	-0.173901	0.547571	-9.82102	1.33912e-19	2.13041e-17	33.4838	0.473795	0.647696	0.173901	12	130205154	F	II	TMEM132D	Body	opensea	Body-opensea		NA	TRUE		rs896511
cg15952487	-0.151562	0.416067	-9.81838	1.36498e-19	2.16586e-17	33.4648	0.351767	0.50333	0.151562	1	158300733	R	II	CD1B	Body	opensea	Body-opensea		NA	NA
cg12565635	-0.164956	0.629129	-9.81501	1.39886e-19	2.21279e-17	33.4405	0.559148	0.724103	0.164956	7	16845331	R	II	AGR2	TSS1500	opensea	TSS1500-opensea		NA	NA
cg26076948	-0.153309	0.527433	-9.8114	1.43597e-19	2.26256e-17	33.4146	0.462393	0.615703	0.153309	12	132892417	F	II	GALNT9	Body	shelf	Body-shelf	chr12:132896299-132896569	TRUE	NA		rs74634667
cg25939242	-0.177083	0.607868	-9.80954	1.45545e-19	2.28725e-17	33.4012	0.532742	0.709825	0.177083	4	9371392	R	II		IGR	opensea	IGR-opensea		NA	NA
cg00786657	-0.17198	0.637831	-9.80176	1.54005e-19	2.4097e-17	33.3453	0.56487	0.73685	0.17198	15	88515810	R	II	NTRK3	Body	opensea	Body-opensea		NA	NA
cg08155759	-0.176617	0.621985	-9.8005	1.5541e-19	2.42432e-17	33.3363	0.547056	0.723673	0.176617	19	57324295	R	II	PEG3	3'UTR	opensea	3'UTR-opensea		NA	NA
cg21748244	-0.17384	0.60726	-9.7911	1.6638e-19	2.57317e-17	33.2687	0.53351	0.70735	0.17384	5	169713179	F	II	LCP2	Body	opensea	Body-opensea		NA	TRUE
cg12849224	-0.181597	0.535795	-9.78819	1.69929e-19	2.6234e-17	33.2478	0.458754	0.640351	0.181597	2	1940991	F	II	MYT1L	Body	shore	Body-shore	chr2:1941068-1941560	NA	NA
cg03265268	-0.152899	0.522554	-9.78448	1.74561e-19	2.68587e-17	33.2211	0.457688	0.610587	0.152899	8	11839764	R	II	DEFB135	TSS200	opensea	TSS200-opensea		NA	NA			rs78424466
cg27226238	-0.166283	0.572918	-9.78442	1.74641e-19	2.68596e-17	33.2207	0.502373	0.668657	0.166283	2	79365613	F	II	REG1P	TSS200	opensea	TSS200-opensea		NA	NA
cg16226785	-0.17328	0.646357	-9.7834	1.75934e-19	2.70239e-17	33.2134	0.572844	0.746124	0.17328	15	87410878	F	II	AGBL1	Body	opensea	Body-opensea		NA	NA
cg15698171	-0.169448	0.539722	-9.78116	1.78812e-19	2.74076e-17	33.1973	0.467835	0.637283	0.169448	20	62795464	F	II	MYT1	TSS1500	opensea	TSS1500-opensea		NA	NA		rs11467347
cg05970721	-0.235119	0.554978	-9.77912	1.81472e-19	2.77681e-17	33.1827	0.45523	0.690349	0.235119	16	22926625	F	I	HS3ST2	Body	island	Body-island	chr16:22926343-22926639	NA	NA
cg10907582	-0.156981	0.544066	-9.76826	1.96327e-19	2.98134e-17	33.1047	0.477468	0.634449	0.156981	14	96411400	R	II		IGR	opensea	IGR-opensea		NA	TRUE
cg07658681	-0.167358	0.626375	-9.76517	2.00767e-19	3.04235e-17	33.0825	0.555375	0.722733	0.167358	10	73553201	F	I	CDH23	Body	opensea	Body-opensea		NA	NA
cg10302781	-0.168917	0.659448	-9.75766	2.11998e-19	3.19242e-17	33.0286	0.587786	0.756703	0.168917	10	83801048	R	II	NRG3	Body	opensea	Body-opensea		NA	TRUE
cg07709358	-0.156347	0.549374	-9.75599	2.14572e-19	3.22478e-17	33.0167	0.483045	0.639392	0.156347	8	2002553	F	II	MYOM2	Body	shore	Body-shore	chr8:2003809-2004059	NA	NA
cg27441409	-0.166601	0.516895	-9.75551	2.15326e-19	3.23442e-17	33.0132	0.446216	0.612817	0.166601	1	153413871	R	II	S100A7L2	TSS1500	opensea	TSS1500-opensea		NA	NA
cg15623111	-0.210446	0.76913	-9.75027	2.23641e-19	3.35233e-17	32.9757	0.679849	0.890295	0.210446	20	60470166	R	I	CDH4	Body	island	Body-island	chr20:60470080-60470335	NA	NA
cg06777472	-0.181404	0.559441	-9.74968	2.24598e-19	3.36529e-17	32.9714	0.482482	0.663886	0.181404	20	57873033	R	II		IGR	shelf	IGR-shelf	chr20:57875317-57876126	NA	NA
cg02858512	0.19059	0.32357	9.74571	2.31147e-19	3.45194e-17	32.9429	0.404426	0.213837	-0.19059	17	1992954	R	II	SMG6	Body	opensea	Body-opensea		NA	TRUE
cg23154832	-0.155526	0.585429	-9.74549	2.31514e-19	3.45598e-17	32.9414	0.519448	0.674974	0.155526	8	4583355	F	II	CSMD1	Body	opensea	Body-opensea		NA	NA
cg08921491	-0.177218	0.656752	-9.74415	2.33769e-19	3.48243e-17	32.9318	0.581569	0.758787	0.177218	15	88577641	F	II	NTRK3	Body	opensea	Body-opensea		NA	NA
cg14128411	-0.173545	0.524202	-9.74346	2.34931e-19	3.49397e-17	32.9269	0.450577	0.624122	0.173545	2	1926907	F	II	MYT1L	Body	opensea	Body-opensea		NA	NA	low-CpG:1905605-1905922	rs80078908
cg06966242	-0.204001	0.578235	-9.74194	2.37534e-19	3.52735e-17	32.9159	0.491689	0.69569	0.204001	1	4832432	F	I	AJAP1	Body	island	Body-island	chr1:4832351-4832553	NA	NA
cg24026690	-0.173577	0.595819	-9.74192	2.37567e-19	3.52735e-17	32.9158	0.522181	0.695757	0.173577	18	76280877	R	II		IGR	shelf	IGR-shelf	chr18:76277579-76277827	NA	NA
cg26248646	-0.172748	0.528901	-9.7326	2.54135e-19	3.73641e-17	32.849	0.455614	0.628362	0.172748	12	34501300	F	I		IGR	shore	IGR-shore	chr12:34500550-34500814	NA	NA
cg13655674	0.154763	0.4657	9.73143	2.56304e-19	3.76523e-17	32.8406	0.531357	0.376594	-0.154763	1	119522386	R	II	TBX15	5'UTR	island	5'UTR-island	chr1:119522385-119522638	NA	NA
cg27535214	-0.176099	0.579989	-9.72529	2.67922e-19	3.92313e-17	32.7967	0.50528	0.68138	0.176099	2	22059216	R	II		IGR	opensea	IGR-opensea		NA	TRUE
cg18100127	-0.186532	0.560948	-9.72053	2.77315e-19	4.05079e-17	32.7626	0.481813	0.668345	0.186532	7	130125764	R	I	MEST	TSS1500	shore	TSS1500-shore	chr7:130126017-130126801	NA	NA
cg10044209	-0.165102	0.649021	-9.70439	3.1161e-19	4.49708e-17	32.647	0.578978	0.74408	0.165102	14	88122084	R	II		IGR	opensea	IGR-opensea		NA	NA
cg17583957	-0.16448	0.506593	-9.69742	3.27686e-19	4.69525e-17	32.5972	0.436813	0.601293	0.16448	17	67536299	R	II	MAP2K6	Body	opensea	Body-opensea		NA	TRUE
cg00674679	0.168202	0.506392	9.69338	3.37402e-19	4.82296e-17	32.5683	0.577751	0.409549	-0.168202	2	176931680	F	I		IGR	island	IGR-island	chr2:176931575-176932663	NA	NA
cg25730098	-0.180602	0.587653	-9.68532	3.57598e-19	5.08344e-17	32.5107	0.511034	0.691636	0.180602	19	56346628	F	II	NLRP11	5'UTR	opensea	5'UTR-opensea		NA	NA
cg06292312	-0.150027	0.584889	-9.6781	3.76724e-19	5.33219e-17	32.4591	0.521241	0.671268	0.150027	7	154958907	F	II		IGR	opensea	IGR-opensea		TRUE	NA
cg04574507	-0.186288	0.538901	-9.67681	3.80244e-19	5.37977e-17	32.4499	0.459869	0.646157	0.186288	1	158301038	F	II	CD1B	Body	opensea	Body-opensea		NA	NA		rs3181084
cg24556382	-0.157815	0.518671	-9.6756	3.83574e-19	5.41851e-17	32.4412	0.451719	0.609534	0.157815	4	174173455	R	II	GALNT7	Body	opensea	Body-opensea		TRUE	TRUE
cg24377694	-0.226786	0.632309	-9.67515	3.84806e-19	5.43379e-17	32.4381	0.536097	0.762883	0.226786	20	1975372	R	I	PDYN	TSS1500	opensea	TSS1500-opensea		NA	NA
cg06042849	0.178278	0.484306	9.67506	3.85061e-19	5.43526e-17	32.4374	0.559939	0.381661	-0.178278	10	547025	F	II	DIP2C	Body	opensea	Body-opensea		NA	TRUE
cg25536739	0.150717	0.501268	9.67241	3.92491e-19	5.52714e-17	32.4185	0.565208	0.414491	-0.150717	5	54518883	F	II		IGR	shore	IGR-shore	chr5:54519054-54519628	NA	NA		rs77412861
cg04879378	-0.166635	0.662891	-9.67063	3.97567e-19	5.58771e-17	32.4057	0.592198	0.758833	0.166635	8	10929210	F	II	XKR6	Body	island	Body-island	chr8:10928984-10929211	NA	NA
cg11536474	0.158017	0.618863	9.67041	3.98188e-19	5.59276e-17	32.4042	0.6859	0.527883	-0.158017	2	63286049	F	I		IGR	island	IGR-island	chr2:63285949-63287097	NA	TRUE
cg22679813	-0.227466	0.595157	-9.66933	4.0131e-19	5.63153e-17	32.3965	0.498656	0.726122	0.227466	7	154068736	R	I	DPP6	Body	opensea	Body-opensea		NA	TRUE
cg06166371	-0.160341	0.602536	-9.66841	4.03991e-19	5.65815e-17	32.3899	0.534513	0.694854	0.160341	8	872030	R	II		IGR	opensea	IGR-opensea		NA	NA
cg13977620	-0.156993	0.55219	-9.66339	4.18879e-19	5.8417e-17	32.354	0.485586	0.642579	0.156993	12	119715090	F	II		IGR	opensea	IGR-opensea		NA	TRUE		rs71451828
cg12129480	-0.173286	0.492293	-9.65355	4.49638e-19	6.2273e-17	32.2838	0.418777	0.592064	0.173286	1	158549410	R	II	OR10X1	1stExon	opensea	1stExon-opensea		NA	NA			rs35095271
cg04388226	-0.185352	0.456383	-9.6498	4.6196e-19	6.38081e-17	32.257	0.377749	0.563101	0.185352	12	128366031	F	II		IGR	opensea	IGR-opensea		NA	NA		rs998204
cg12589098	-0.155042	0.553809	-9.64952	4.62897e-19	6.3913e-17	32.255	0.488034	0.643076	0.155042	10	130860205	R	II		IGR	opensea	IGR-opensea		NA	TRUE
cg11862144	-0.225224	0.564959	-9.64598	4.74849e-19	6.54879e-17	32.2298	0.469409	0.694633	0.225224	18	61143961	R	I	SERPINB5	TSS200	opensea	TSS200-opensea		NA	NA
cg03670736	-0.154875	0.500639	-9.64213	4.88192e-19	6.70715e-17	32.2023	0.434935	0.58981	0.154875	12	13748224	F	II	GRIN2B	Body	opensea	Body-opensea		NA	TRUE
cg16490191	-0.185489	0.618662	-9.64141	4.90744e-19	6.73707e-17	32.1972	0.539969	0.725458	0.185489	16	1428639	F	II	UNKL	5'UTR	shore	5'UTR-shore	chr16:1429050-1430104	NA	TRUE
cg14036821	-0.180284	0.675948	-9.6411	4.91845e-19	6.74962e-17	32.195	0.599464	0.779748	0.180284	10	2699314	F	II		IGR	opensea	IGR-opensea		NA	NA
cg04633922	-0.247322	0.67226	-9.64082	4.92819e-19	6.76041e-17	32.193	0.567336	0.814658	0.247322	10	2699291	F	I		IGR	opensea	IGR-opensea		NA	NA
cg13416517	-0.160948	0.58393	-9.62026	5.71421e-19	7.72636e-17	32.0464	0.515649	0.676598	0.160948	2	620106	R	II		IGR	shore	IGR-shore	chr2:620639-621993	NA	NA
cg19539556	-0.163	0.591255	-9.61981	5.73268e-19	7.7432e-17	32.0432	0.522103	0.685103	0.163	11	55110562	F	II	OR4A16	TSS200	opensea	TSS200-opensea		NA	NA		rs60999778	rs77343615
cg04150276	-0.191221	0.611061	-9.61817	5.80065e-19	7.82036e-17	32.0316	0.529937	0.721158	0.191221	14	53256600	R	II	GNPNAT1	5'UTR	shore	5'UTR-shore	chr14:53257664-53258400	NA	NA
cg23325413	-0.154829	0.474578	-9.61664	5.8651e-19	7.89248e-17	32.0206	0.408893	0.563723	0.154829	5	4773407	R	II		IGR	opensea	IGR-opensea		NA	NA
cg24327361	-0.177535	0.631539	-9.6161	5.88772e-19	7.91998e-17	32.0168	0.556221	0.733756	0.177535	8	4583386	R	I	CSMD1	Body	opensea	Body-opensea		NA	NA
cg09134205	-0.196967	0.626616	-9.61549	5.91355e-19	7.94879e-17	32.0125	0.543055	0.740021	0.196967	7	154003215	R	I	DPP6	Body	shore	Body-shore	chr7:154001964-154002281	NA	NA
cg01272790	-0.161894	0.581032	-9.61496	5.93617e-19	7.97621e-17	32.0087	0.51235	0.674244	0.161894	2	79255434	F	II	REG3G	3'UTR	opensea	3'UTR-opensea		NA	NA
cg24688309	-0.155697	0.667015	-9.61246	6.04412e-19	8.09111e-17	31.9908	0.600961	0.756658	0.155697	20	60456498	R	I	CDH4	Body	island	Body-island	chr20:60456285-60456612	NA	NA
cg15896151	-0.177755	0.698294	-9.60983	6.15952e-19	8.23336e-17	31.9721	0.622882	0.800637	0.177755	13	112624791	R	II		IGR	shelf	IGR-shelf	chr13:112627428-112627642	NA	NA
cg08030922	-0.154062	0.53809	-9.60502	6.37603e-19	8.49128e-17	31.9379	0.47273	0.626793	0.154062	4	90675036	R	II	SNCA	Body	opensea	Body-opensea		TRUE	TRUE			rs77795436
cg03223949	-0.156876	0.551945	-9.60331	6.45499e-19	8.5806e-17	31.9257	0.485391	0.642267	0.156876	20	60397915	F	II	CDH4	Body	opensea	Body-opensea		NA	NA		rs77975603
cg03602321	-0.194857	0.532328	-9.60034	6.59403e-19	8.75573e-17	31.9046	0.449662	0.644518	0.194857	5	3962083	F	II		IGR	shore	IGR-shore	chr5:3962286-3962512	NA	NA		rs658848
cg02852529	-0.180209	0.633791	-9.59912	6.65201e-19	8.82946e-17	31.8959	0.557339	0.737547	0.180209	11	20057511	R	II	NAV2	Body	opensea	Body-opensea		TRUE	TRUE
cg23019935	0.181565	0.366098	9.59826	6.69352e-19	8.87492e-17	31.8898	0.443125	0.26156	-0.181565	1	22416488	R	II	CDC42	Body	opensea	Body-opensea		NA	TRUE
cg15418809	-0.185883	0.672477	-9.59636	6.78522e-19	8.98974e-17	31.8763	0.593617	0.7795	0.185883	14	53256878	R	II	GNPNAT1	5'UTR	shore	5'UTR-shore	chr14:53257664-53258400	NA	NA
cg03240663	-0.158473	0.535868	-9.58683	7.2662e-19	9.5672e-17	31.8085	0.468637	0.62711	0.158473	19	52150547	F	II	SIGLEC14	TSS1500	opensea	TSS1500-opensea		NA	NA
cg04463607	-0.157078	0.536471	-9.58597	7.31148e-19	9.6198e-17	31.8023	0.469832	0.62691	0.157078	11	114549162	F	II	FAM55B	TSS200	opensea	TSS200-opensea		NA	NA
cg10663897	-0.162802	0.625495	-9.58021	7.61978e-19	1.00035e-16	31.7614	0.556427	0.71923	0.162802	2	161980152	F	II		IGR	opensea	IGR-opensea		NA	TRUE
cg26436136	-0.151626	0.483391	-9.58001	7.6307e-19	1.00106e-16	31.76	0.419065	0.570691	0.151626	3	182970675	F	I	MCF2L2	Body	shore	Body-shore	chr3:182971429-182972635	NA	NA
cg00061185	-0.151635	0.573376	-9.57406	7.96416e-19	1.04026e-16	31.7176	0.509046	0.660681	0.151635	12	50596347	R	II	LIMA1	Body	opensea	Body-opensea		NA	TRUE
cg14143580	-0.162242	0.47976	-9.57296	8.02717e-19	1.04735e-16	31.7098	0.41093	0.573173	0.162242	20	29960982	R	II	DEFB118	3'UTR	opensea	3'UTR-opensea		NA	NA
cg00121389	0.17086	0.415552	9.57256	8.05009e-19	1.04958e-16	31.707	0.488038	0.317178	-0.17086	8	17555302	R	II	MTUS1	Body	opensea	Body-opensea		NA	NA
cg24335070	0.205014	0.414819	9.57007	8.19543e-19	1.06583e-16	31.6893	0.501794	0.29678	-0.205014	2	179914864	F	II		IGR	opensea	IGR-opensea		NA	TRUE
cg00067742	-0.189565	0.572446	-9.56986	8.20781e-19	1.06706e-16	31.6878	0.492024	0.681589	0.189565	2	1926888	R	II	MYT1L	Body	opensea	Body-opensea		NA	NA	low-CpG:1905605-1905922
cg03612582	-0.159428	0.596437	-9.56233	8.66355e-19	1.12065e-16	31.6343	0.528801	0.688229	0.159428	16	26427350	F	II		IGR	opensea	IGR-opensea		NA	TRUE		rs16975842
cg16298813	-0.150507	0.627394	-9.55641	9.03893e-19	1.16419e-16	31.5923	0.563543	0.71405	0.150507	1	2878455	F	II		IGR	shore	IGR-shore	chr1:2876545-2876808	NA	NA		rs12081983
cg20129035	-0.159159	0.598537	-9.54935	9.5085e-19	1.22075e-16	31.5421	0.531015	0.690174	0.159159	10	134918781	F	I	GPR123	Body	island	Body-island	chr10:134918755-134918975	NA	NA		rs60961925	rs61698156
cg12137156	-0.167016	0.508002	-9.5491	9.52534e-19	1.22247e-16	31.5404	0.437147	0.604163	0.167016	8	49985021	F	II	C8orf22	1stExon	opensea	1stExon-opensea		NA	NA
cg07356412	-0.180913	0.640191	-9.5452	9.79545e-19	1.25402e-16	31.5127	0.56344	0.744352	0.180913	8	11044280	R	II	XKR6	Body	opensea	Body-opensea		NA	TRUE
cg11480962	-0.161104	0.642284	-9.53697	1.03907e-18	1.32317e-16	31.4542	0.573937	0.735041	0.161104	15	87667131	F	II		IGR	opensea	IGR-opensea		NA	NA
cg22914987	-0.164148	0.578967	-9.53689	1.03966e-18	1.32321e-16	31.4537	0.509329	0.673477	0.164148	12	4054555	F	II		IGR	opensea	IGR-opensea		NA	TRUE
cg04086239	-0.156234	0.504658	-9.5287	1.10245e-18	1.39746e-16	31.3956	0.438377	0.594611	0.156234	16	24067174	R	II	PRKCB	Body	opensea	Body-opensea		NA	TRUE
cg07834841	-0.191907	0.532196	-9.52831	1.10551e-18	1.40085e-16	31.3929	0.450781	0.642688	0.191907	10	130185342	F	I		IGR	opensea	IGR-opensea		NA	NA
cg25940557	-0.15348	0.476778	-9.52304	1.14807e-18	1.44968e-16	31.3555	0.411665	0.565145	0.15348	1	158575177	F	II	OR10Z1	TSS1500	opensea	TSS1500-opensea		NA	NA
cg07048608	-0.190126	0.569767	-9.51676	1.20086e-18	1.51105e-16	31.3109	0.489108	0.679234	0.190126	1	158581040	F	II	SPTA1	3'UTR	opensea	3'UTR-opensea		NA	NA
cg10575986	-0.174002	0.730164	-9.51476	1.21819e-18	1.52965e-16	31.2968	0.656345	0.830347	0.174002	7	154003309	F	I	DPP6	Body	shore	Body-shore	chr7:154001964-154002281	NA	NA
cg18961101	-0.157122	0.639851	-9.51467	1.21893e-18	1.53005e-16	31.2962	0.573194	0.730316	0.157122	12	4923116	R	II	KCNA6	3'UTR	shelf	3'UTR-shelf	chr12:4918273-4919657	NA	NA
cg01733284	-0.189836	0.559604	-9.51107	1.25079e-18	1.56832e-16	31.2706	0.479067	0.668904	0.189836	1	158391119	R	II	OR10K2	TSS1500	opensea	TSS1500-opensea		NA	NA
cg08063051	-0.20088	0.475882	-9.51103	1.25116e-18	1.56832e-16	31.2703	0.39066	0.59154	0.20088	16	1428706	R	I	UNKL	5'UTR	shore	5'UTR-shore	chr16:1429050-1430104	NA	TRUE
cg21769702	-0.217404	0.644944	-9.51028	1.25788e-18	1.57566e-16	31.265	0.552712	0.770116	0.217404	11	127811589	R	I		IGR	opensea	IGR-opensea		TRUE	NA
cg23476447	-0.20591	0.705403	-9.50863	1.27275e-18	1.59151e-16	31.2534	0.618047	0.823957	0.20591	15	25485996	R	I	SNORD115-39	TSS1500	opensea	TSS1500-opensea		NA	NA
cg06941009	-0.163103	0.662255	-9.50799	1.27859e-18	1.5977e-16	31.2488	0.59306	0.756163	0.163103	16	6249672	F	II	A2BP1	5'UTR	opensea	5'UTR-opensea		NA	TRUE
cg01145686	-0.158748	0.546073	-9.50638	1.29341e-18	1.61232e-16	31.2374	0.478726	0.637474	0.158748	2	501496	R	II		IGR	shore	IGR-shore	chr2:502994-503502	NA	NA
cg11595635	-0.179997	0.575241	-9.50419	1.31387e-18	1.63499e-16	31.2219	0.498879	0.678876	0.179997	5	2634163	R	II		IGR	opensea	IGR-opensea		NA	NA
cg26327092	-0.160025	0.648509	-9.50395	1.31611e-18	1.63696e-16	31.2202	0.58062	0.740645	0.160025	12	130469463	R	II		IGR	opensea	IGR-opensea		NA	TRUE
cg16746576	0.160948	0.477697	9.49786	1.37472e-18	1.70307e-16	31.1771	0.545978	0.38503	-0.160948	8	99962118	R	II	OSR2	Body	shore	Body-shore	chr8:99960497-99961438	NA	TRUE
cg22790986	-0.172365	0.649412	-9.4974	1.37921e-18	1.70804e-16	31.1738	0.576287	0.748652	0.172365	11	123757153	R	II	TMEM225	TSS1500	opensea	TSS1500-opensea		NA	NA
cg09141856	-0.167024	0.652009	-9.49683	1.38491e-18	1.71393e-16	31.1697	0.58115	0.748175	0.167024	16	5498227	R	II		IGR	opensea	IGR-opensea		NA	TRUE
cg04052038	-0.187277	0.629948	-9.49539	1.39915e-18	1.73036e-16	31.1596	0.550497	0.737774	0.187277	21	31588123	F	II	CLDN8	1stExon	opensea	1stExon-opensea		NA	NA		rs1557294
cg09593033	-0.16253	0.641087	-9.4867	1.48883e-18	1.83516e-16	31.0981	0.572135	0.734665	0.16253	15	25472237	R	II	SNORD115-15	Body	opensea	Body-opensea		NA	NA
cg13082295	-0.161506	0.708838	-9.48602	1.49613e-18	1.84271e-16	31.0933	0.640321	0.801827	0.161506	15	20564078	R	I		IGR	island	IGR-island	chr15:20563982-20564209	NA	NA
cg08645400	-0.164211	0.579685	-9.48314	1.52724e-18	1.8759e-16	31.0729	0.510019	0.674231	0.164211	16	49307062	F	II		IGR	shelf	IGR-shelf	chr16:49309123-49309353	NA	NA
cg23751171	-0.152227	0.676306	-9.48077	1.55328e-18	1.90271e-16	31.0561	0.611724	0.763952	0.152227	12	92618924	F	II		IGR	opensea	IGR-opensea		NA	TRUE		rs58961487
cg17349632	-0.158707	0.579326	-9.47777	1.58695e-18	1.93933e-16	31.0349	0.511995	0.670703	0.158707	7	131830544	R	II	PLXNA4	Body	opensea	Body-opensea		TRUE	NA
cg18574254	-0.170353	0.580499	-9.47732	1.59204e-18	1.9449e-16	31.0317	0.508228	0.678581	0.170353	7	126889015	F	II	GRM8	5'UTR	shelf	5'UTR-shelf	chr7:126891300-126894205	NA	NA
cg20901464	-0.175488	0.661526	-9.47593	1.60794e-18	1.96233e-16	31.0219	0.587077	0.762565	0.175488	13	112763220	F	I		IGR	shelf	IGR-shelf	chr13:112758598-112760491	NA	TRUE		rs71652097	rs57655502
cg24937735	-0.157221	0.643659	-9.47449	1.62458e-18	1.9813e-16	31.0117	0.576959	0.73418	0.157221	1	94245226	F	II		IGR	opensea	IGR-opensea		TRUE	TRUE
cg25727008	-0.16116	0.613712	-9.47271	1.64543e-18	2.00382e-16	30.9991	0.545341	0.706501	0.16116	7	62577907	R	II		IGR	shelf	IGR-shelf	chr7:62574596-62575257	NA	NA
cg11198968	-0.172844	0.68123	-9.47267	1.64583e-18	2.00382e-16	30.9988	0.607903	0.780746	0.172844	10	83676596	R	II	NRG3	Body	opensea	Body-opensea		NA	TRUE
cg13979884	-0.189115	0.458147	-9.47078	1.6682e-18	2.02832e-16	30.9855	0.377917	0.567032	0.189115	9	74061171	F	I		IGR	shore	IGR-shore	chr9:74061513-74062097	NA	NA
cg10019018	-0.156648	0.524799	-9.46946	1.68402e-18	2.04341e-16	30.9761	0.458343	0.614991	0.156648	12	119214021	R	II		IGR	shore	IGR-shore	chr12:119212110-119212393	NA	NA
cg26345619	-0.181018	0.662491	-9.46883	1.6916e-18	2.05192e-16	30.9717	0.585695	0.766714	0.181018	12	2602405	R	I	CACNA1C	Body	opensea	Body-opensea		NA	NA
cg06906435	-0.187222	0.475382	-9.46733	1.70987e-18	2.07091e-16	30.961	0.395955	0.583176	0.187222	14	99177777	R	II	C14orf177	TSS200	opensea	TSS200-opensea		NA	NA
cg02550537	-0.172958	0.628624	-9.4673	1.71013e-18	2.07091e-16	30.9609	0.555248	0.728206	0.172958	15	25450131	R	II	SNORD115-21	TSS1500	opensea	TSS1500-opensea		NA	NA
cg08866634	0.165936	0.473971	9.46699	1.71392e-18	2.07481e-16	30.9587	0.544368	0.378432	-0.165936	5	175962338	F	II	RNF44	5'UTR	shore	5'UTR-shore	chr5:175963498-175965116	NA	NA
cg07151236	-0.158953	0.57544	-9.46224	1.77314e-18	2.13931e-16	30.9251	0.508005	0.666958	0.158953	20	59543878	F	II		IGR	shore	IGR-shore	chr20:59542508-59542739	NA	NA
cg06640593	-0.187824	0.500661	-9.45912	1.81303e-18	2.17941e-16	30.903	0.420978	0.608802	0.187824	2	568321	R	II		IGR	opensea	IGR-opensea		NA	NA
cg06383709	-0.16927	0.651586	-9.45762	1.83257e-18	2.19851e-16	30.8924	0.579775	0.749045	0.16927	16	26148977	R	II	HS3ST4	3'UTR	opensea	3'UTR-opensea		NA	NA
cg10677017	-0.155616	0.517357	-9.45646	1.84772e-18	2.21153e-16	30.8843	0.451338	0.606954	0.155616	11	132184930	F	II	NTM	Body	opensea	Body-opensea		NA	NA		rs3133912
cg17664269	-0.185156	0.511541	-9.44514	2.00323e-18	2.38106e-16	30.8043	0.43299	0.618146	0.185156	3	3080621	F	I	CNTN4	Body	opensea	Body-opensea		NA	TRUE
cg20064139	-0.239943	0.704298	-9.4448	2.00801e-18	2.3853e-16	30.8019	0.602504	0.842446	0.239943	20	41823021	F	I		IGR	shelf	IGR-shelf	chr20:41817475-41819212	NA	NA
cg18030265	-0.150383	0.607554	-9.44479	2.00812e-18	2.3853e-16	30.8018	0.543755	0.694138	0.150383	6	32975083	F	II	HLA-DOA	Body	shore	Body-shore	chr6:32975684-32975926	NA	NA
cg12651953	-0.162327	0.577976	-9.4423	2.0442e-18	2.42576e-16	30.7842	0.50911	0.671437	0.162327	17	31861187	R	II	ACCN1	Body	opensea	Body-opensea		NA	NA
cg06690548	-0.167507	0.539522	-9.44125	2.05957e-18	2.44238e-16	30.7768	0.468458	0.635965	0.167507	4	139162808	R	II	SLC7A11	Body	opensea	Body-opensea		NA	NA
cg25401594	-0.17247	0.669983	-9.43954	2.08483e-18	2.4699e-16	30.7647	0.596814	0.769284	0.17247	19	57323858	F	II	PEG3	3'UTR	opensea	3'UTR-opensea		NA	NA			rs45600540
cg07309576	-0.159556	0.642903	-9.43586	2.14014e-18	2.52878e-16	30.7388	0.575213	0.734769	0.159556	11	5463768	R	II	OR51I1	TSS1500	opensea	TSS1500-opensea		NA	NA
cg00119186	-0.182675	0.625123	-9.43453	2.16054e-18	2.54705e-16	30.7294	0.547624	0.730299	0.182675	1	158670124	R	II	OR6K2	1stExon	opensea	1stExon-opensea		NA	NA
cg03618016	-0.16789	0.560591	-9.43392	2.17002e-18	2.55488e-16	30.7251	0.489365	0.657255	0.16789	1	247769804	F	II	OR2G3	1stExon	opensea	1stExon-opensea		NA	NA
cg02567289	-0.178105	0.538928	-9.42964	2.23729e-18	2.62294e-16	30.6949	0.463369	0.641474	0.178105	1	247805255	F	II		IGR	shelf	IGR-shelf	chr1:247802738-247803141	NA	NA
cg22205341	-0.181047	0.629993	-9.42927	2.24307e-18	2.628e-16	30.6923	0.553185	0.734232	0.181047	11	126611424	F	II	KIRREL3	Body	opensea	Body-opensea		NA	TRUE		rs10893560
cg26090020	-0.17129	0.566944	-9.42752	2.27121e-18	2.65738e-16	30.68	0.494276	0.665565	0.17129	17	32903717	R	II	C17orf102	3'UTR	shelf	3'UTR-shelf	chr17:32905965-32908951	NA	NA
cg22461649	-0.163668	0.673671	-9.42703	2.27927e-18	2.66522e-16	30.6765	0.604236	0.767904	0.163668	15	86468928	R	II		IGR	opensea	IGR-opensea		NA	TRUE
cg02480320	-0.152093	0.451948	-9.4246	2.31902e-18	2.70381e-16	30.6593	0.387423	0.539516	0.152093	5	2135054	R	II		IGR	shore	IGR-shore	chr5:2136797-2137305	NA	NA
cg04303500	-0.157115	0.603272	-9.42451	2.32057e-18	2.70475e-16	30.6587	0.536617	0.693733	0.157115	20	59602012	R	II		IGR	shelf	IGR-shelf	chr20:59598843-59599305	NA	NA
cg04795575	-0.169973	0.74024	-9.42113	2.3771e-18	2.76617e-16	30.6348	0.668131	0.838104	0.169973	13	112907267	F	I		IGR	opensea	IGR-opensea		NA	NA
cg19945931	-0.160092	0.358442	-9.41929	2.40842e-18	2.79809e-16	30.6219	0.290524	0.450616	0.160092	12	133022760	F	I		IGR	island	IGR-island	chr12:133022649-133022863	TRUE	NA
cg23841760	-0.150902	0.661685	-9.41565	2.47165e-18	2.86233e-16	30.5962	0.597666	0.748568	0.150902	15	25427435	R	II	SNORD115-7	TSS200	opensea	TSS200-opensea		NA	NA
cg26537274	-0.159014	0.636897	-9.40968	2.57894e-18	2.96846e-16	30.5542	0.569436	0.72845	0.159014	19	57379813	F	II		IGR	shelf	IGR-shelf	chr19:57375842-57376422	NA	NA
cg17497172	-0.189692	0.639923	-9.4027	2.71042e-18	3.10492e-16	30.5049	0.559448	0.74914	0.189692	20	30028229	R	I	DEFB123	TSS200	opensea	TSS200-opensea		NA	NA
cg02907117	-0.187878	0.598388	-9.39224	2.91977e-18	3.31234e-16	30.4313	0.518682	0.706561	0.187878	12	132983589	F	II		IGR	island	IGR-island	chr12:132983167-132984354	NA	NA
cg18236250	-0.167453	0.693004	-9.39184	2.92815e-18	3.31954e-16	30.4284	0.621964	0.789417	0.167453	4	16791106	F	II	LDB2	Body	opensea	Body-opensea		NA	TRUE		rs11945913
cg07834418	-0.159662	0.515678	-9.39179	2.92925e-18	3.31974e-16	30.4281	0.447942	0.607604	0.159662	10	107409739	R	II		IGR	opensea	IGR-opensea		NA	TRUE
cg15585555	0.161438	0.503564	9.38987	2.96948e-18	3.36217e-16	30.4146	0.572053	0.410615	-0.161438	1	206732715	F	II	RASSF5	Body	shore	Body-shore	chr1:206730397-206730908	NA	NA
cg03655683	0.155576	0.487501	9.38639	3.04373e-18	3.43437e-16	30.3901	0.553503	0.397927	-0.155576	2	63281383	F	II	OTX1	Body	shore	Body-shore	chr2:63282514-63283122	NA	NA
cg00018850	-0.154749	0.592292	-9.38604	3.05137e-18	3.4419e-16	30.3876	0.526641	0.68139	0.154749	14	73066921	F	II		IGR	opensea	IGR-opensea		NA	TRUE		rs75273108
cg26570714	-0.154733	0.483006	-9.38469	3.08079e-18	3.47184e-16	30.3781	0.417362	0.572095	0.154733	1	248756151	R	II	OR2T10	1stExon	opensea	1stExon-opensea		NA	NA			rs78874169
cg25708982	-0.176779	0.525146	-9.38247	3.12986e-18	3.5249e-16	30.3625	0.450149	0.626928	0.176779	13	112895431	R	I		IGR	island	IGR-island	chr13:112895427-112895708	NA	NA
cg19571360	-0.18934	0.684849	-9.37897	3.20868e-18	3.60357e-16	30.3379	0.604523	0.793863	0.18934	14	106307030	R	I		IGR	opensea	IGR-opensea		NA	NA
cg17689601	-0.179172	0.595607	-9.37686	3.25721e-18	3.65466e-16	30.323	0.519595	0.698767	0.179172	10	83651137	F	II	NRG3	Body	opensea	Body-opensea		NA	TRUE
cg26869417	-0.156952	0.552107	-9.37242	3.36168e-18	3.76484e-16	30.2918	0.485521	0.642473	0.156952	10	130274509	F	II		IGR	opensea	IGR-opensea		NA	NA
cg22534097	-0.152543	0.48737	-9.37074	3.4019e-18	3.80634e-16	30.28	0.422654	0.575197	0.152543	10	92681082	F	II	ANKRD1	TSS200	opensea	TSS200-opensea		TRUE	NA
cg04183602	-0.18489	0.619063	-9.36899	3.44458e-18	3.84931e-16	30.2676	0.540625	0.725515	0.18489	20	59861006	R	I	CDH4	Body	shelf	Body-shelf	chr20:59864748-59865069	NA	NA
cg15034009	-0.162656	0.627669	-9.36566	3.52701e-18	3.93289e-16	30.2442	0.558663	0.721319	0.162656	15	26425086	R	II		IGR	opensea	IGR-opensea		NA	TRUE
cg10617784	0.158693	0.525995	9.36525	3.5372e-18	3.94182e-16	30.2414	0.59332	0.434627	-0.158693	2	71134586	R	II	VAX2	Body	island	Body-island	chr2:71134585-71134792	NA	TRUE			rs35121961
cg16065473	-0.164588	0.6	-9.36032	3.66343e-18	4.0674e-16	30.2067	0.530175	0.694763	0.164588	15	88576884	R	II	NTRK3	Body	opensea	Body-opensea		NA	NA
cg27208307	0.191866	0.378756	9.35949	3.68487e-18	4.08655e-16	30.2009	0.460153	0.268288	-0.191866	10	70847399	F	II	SRGN	TSS1500	opensea	TSS1500-opensea		NA	NA
cg23983887	0.190522	0.340133	9.35486	3.80822e-18	4.21129e-16	30.1683	0.42096	0.230438	-0.190522	1	12509707	F	II	VPS13D	Body	opensea	Body-opensea		NA	NA		rs76660514
cg24202448	-0.191086	0.596151	-9.35422	3.82551e-18	4.22652e-16	30.1638	0.515084	0.70617	0.191086	10	7568106	R	II		IGR	opensea	IGR-opensea		NA	NA
cg14766621	-0.234552	0.656816	-9.35182	3.89128e-18	4.29261e-16	30.1469	0.557309	0.791861	0.234552	2	1891057	F	I	MYT1L	Body	opensea	Body-opensea		NA	NA
cg23067090	-0.165394	0.658609	-9.35028	3.93393e-18	4.33568e-16	30.1361	0.588442	0.753836	0.165394	15	25809518	R	II		IGR	opensea	IGR-opensea		NA	TRUE
cg06580523	-0.198855	0.611232	-9.35008	3.93969e-18	4.33938e-16	30.1347	0.52687	0.725725	0.198855	12	132908454	F	II		IGR	shelf	IGR-shelf	chr12:132910476-132910802	NA	NA
cg12676534	-0.187332	0.505937	-9.34784	4.0026e-18	4.40195e-16	30.119	0.426463	0.613795	0.187332	20	30449856	F	I	DUSP15	Body	shore	Body-shore	chr20:30449011-30449593	TRUE	NA
cg09696486	-0.157061	0.635435	-9.34775	4.00519e-18	4.40345e-16	30.1184	0.568803	0.725864	0.157061	16	7270014	F	II	A2BP1	Body	opensea	Body-opensea		NA	TRUE
cg18332838	-0.157905	0.499781	-9.3476	4.00944e-18	4.40677e-16	30.1173	0.432791	0.590696	0.157905	8	126698738	R	II		IGR	opensea	IGR-opensea		NA	TRUE
cg25972591	-0.158912	0.642295	-9.34354	4.12688e-18	4.52757e-16	30.0887	0.574878	0.73379	0.158912	19	58627987	F	II	ZSCAN18	Body	shore	Body-shore	chr19:58629309-58630241	NA	NA		rs73579155
cg09736361	-0.168847	0.605771	-9.34287	4.14627e-18	4.54747e-16	30.0841	0.534139	0.702986	0.168847	2	242833228	F	II		IGR	island	IGR-island	chr2:242832999-242833229	NA	TRUE
cg14958969	-0.196932	0.517785	-9.34217	4.16696e-18	4.56505e-16	30.0792	0.434238	0.63117	0.196932	2	1942814	R	I	MYT1L	Body	shore	Body-shore	chr2:1941068-1941560	NA	NA
cg04649215	-0.176148	0.685114	-9.34216	4.16737e-18	4.56505e-16	30.0791	0.610385	0.786533	0.176148	20	62048869	R	I	KCNQ2	Body	shelf	Body-shelf	chr20:62051941-62052286	NA	TRUE
cg27514017	-0.151576	0.615738	-9.34057	4.21475e-18	4.60994e-16	30.0679	0.551433	0.703009	0.151576	10	130684739	F	II		IGR	opensea	IGR-opensea		NA	NA		rs76227344
cg08922032	-0.175698	0.68043	-9.33876	4.26907e-18	4.65791e-16	30.0552	0.605892	0.781589	0.175698	15	24920473	F	I	C15orf2	TSS200	shore	TSS200-shore	chr15:24920613-24921252	NA	NA
cg21451653	-0.185169	0.558951	-9.33858	4.27458e-18	4.65843e-16	30.0539	0.480395	0.665563	0.185169	12	34551994	F	I		IGR	opensea	IGR-opensea		NA	NA		rs80154259
cg20506745	-0.18774	0.58044	-9.33628	4.34479e-18	4.72421e-16	30.0378	0.500792	0.688533	0.18774	2	2581285	R	I		IGR	opensea	IGR-opensea		NA	NA			rs74666721
cg27223272	-0.168553	0.628176	-9.33612	4.34985e-18	4.72617e-16	30.0367	0.556669	0.725222	0.168553	7	152618877	F	II		IGR	shelf	IGR-shelf	chr7:152621916-152622149	NA	NA			rs76348094
cg06401532	-0.164334	0.53073	-9.33535	4.37367e-18	4.75062e-16	30.0313	0.461012	0.625346	0.164334	16	24220008	R	II	PRKCB	Body	opensea	Body-opensea		NA	TRUE
cg01423643	-0.16072	0.600366	-9.33511	4.38104e-18	4.75719e-16	30.0296	0.532182	0.692902	0.16072	1	160992358	R	II	F11R	TSS1500	shore	TSS1500-shore	chr1:160990718-160991225	NA	NA
cg02217063	-0.169245	0.599434	-9.32732	4.62972e-18	5.00611e-16	29.9749	0.527633	0.696878	0.169245	16	6348709	F	II	A2BP1	5'UTR	opensea	5'UTR-opensea		NA	TRUE
cg13208151	-0.151286	0.576031	-9.32702	4.63978e-18	5.01398e-16	29.9728	0.511849	0.663135	0.151286	10	134683335	F	II		IGR	shore	IGR-shore	chr10:134682700-134682917	NA	NA
cg26329192	-0.150519	0.556398	-9.32363	4.75251e-18	5.12424e-16	29.949	0.492541	0.64306	0.150519	12	108687373	F	II	CMKLR1	5'UTR	opensea	5'UTR-opensea		NA	NA
cg07797208	-0.160769	0.656535	-9.31972	4.88599e-18	5.24858e-16	29.9216	0.58833	0.749098	0.160769	19	57642998	R	II	USP29	3'UTR	opensea	3'UTR-opensea		NA	NA
cg17590227	-0.162048	0.493431	-9.31928	4.90128e-18	5.2574e-16	29.9185	0.424684	0.586731	0.162048	8	132201183	R	II		IGR	opensea	IGR-opensea		NA	TRUE
cg08483912	-0.205389	0.726996	-9.3179	4.94954e-18	5.30421e-16	29.9088	0.639862	0.845251	0.205389	10	132632041	R	I		IGR	opensea	IGR-opensea		NA	NA
cg26033932	-0.159379	0.653082	-9.31215	5.15525e-18	5.50828e-16	29.8685	0.585467	0.744846	0.159379	14	70547465	F	II	SLC8A3	Body	opensea	Body-opensea		NA	NA
cg14845962	-0.152011	0.350037	-9.31091	5.20094e-18	5.55381e-16	29.8598	0.285548	0.437558	0.152011	12	58120237	R	I	AGAP2	3'UTR	island	3'UTR-island	chr12:58119909-58121551	NA	NA
cg17897699	-0.161829	0.582709	-9.30625	5.37549e-18	5.71986e-16	29.8271	0.514054	0.675884	0.161829	8	137806993	F	II		IGR	opensea	IGR-opensea		NA	NA		rs73379434
cg21878112	-0.171058	0.68842	-9.30418	5.45462e-18	5.79551e-16	29.8126	0.615849	0.786908	0.171058	14	99183369	F	II	C14orf177	Body	opensea	Body-opensea		NA	NA
cg23332501	-0.156195	0.564534	-9.29338	5.88799e-18	6.22478e-16	29.737	0.498269	0.654464	0.156195	13	111748083	R	II		IGR	shelf	IGR-shelf	chr13:111745493-111745697	NA	NA
cg05682128	-0.159778	0.625806	-9.2928	5.91237e-18	6.24506e-16	29.7329	0.558022	0.717799	0.159778	3	149685395	R	II	PFN2	Body	shelf	Body-shelf	chr3:149687877-149689537	NA	NA
cg17904575	0.196666	0.434601	9.2871	6.15548e-18	6.48475e-16	29.693	0.518035	0.321369	-0.196666	14	102290370	R	II	PPP2R5C	Body	opensea	Body-opensea		NA	TRUE
cg08866665	-0.150322	0.375036	-9.28655	6.17957e-18	6.50253e-16	29.6891	0.311263	0.461585	0.150322	6	169689892	R	I		IGR	opensea	IGR-opensea		NA	NA
cg16010717	-0.16922	0.620661	-9.28412	6.2868e-18	6.60572e-16	29.6721	0.548871	0.718091	0.16922	1	158609685	F	II	SPTA1	Body	opensea	Body-opensea		NA	NA
cg01315201	-0.172109	0.600249	-9.27629	6.64473e-18	6.9494e-16	29.6173	0.527233	0.699342	0.172109	13	45333293	F	II		IGR	opensea	IGR-opensea		TRUE	TRUE
cg07900024	-0.150962	0.572221	-9.27543	6.68509e-18	6.98553e-16	29.6113	0.508177	0.659138	0.150962	20	29896456	R	II	DEFB116	TSS200	opensea	TSS200-opensea		NA	NA
cg08498833	-0.160096	0.481085	-9.27244	6.82804e-18	7.11634e-16	29.5904	0.413165	0.573261	0.160096	8	134003896	R	II	TG	Body	opensea	Body-opensea		NA	TRUE
cg01297762	-0.153891	0.656047	-9.27211	6.84385e-18	7.1287e-16	29.5881	0.59076	0.744651	0.153891	2	471590	R	II		IGR	shelf	IGR-shelf	chr2:467849-468659	NA	NA
cg20947259	-0.165854	0.550982	-9.2693	6.98152e-18	7.25742e-16	29.5684	0.480619	0.646474	0.165854	1	201572159	F	I		IGR	opensea	IGR-opensea		TRUE	TRUE
cg18601466	-0.159023	0.60515	-9.26912	6.99002e-18	7.26416e-16	29.5672	0.537686	0.696709	0.159023	10	132582190	R	II		IGR	shore	IGR-shore	chr10:132583720-132584164	NA	NA
cg23980176	-0.185894	0.633673	-9.26714	7.08882e-18	7.35411e-16	29.5533	0.554809	0.740702	0.185894	12	127384772	R	II		IGR	opensea	IGR-opensea		NA	NA
cg14654773	-0.168884	0.645838	-9.266	7.14625e-18	7.40943e-16	29.5453	0.57419	0.743074	0.168884	2	80205127	F	II	CTNNA2	Body	opensea	Body-opensea		NA	TRUE		rs73938444
cg00981443	-0.169299	0.557112	-9.26481	7.20629e-18	7.46524e-16	29.537	0.485288	0.654587	0.169299	1	152681163	R	II	LCE4A	TSS1500	opensea	TSS1500-opensea		NA	NA
cg26125690	-0.16766	0.573672	-9.26108	7.39891e-18	7.64063e-16	29.5109	0.502543	0.670204	0.16766	8	13295112	R	II	DLC1	Body	opensea	Body-opensea		NA	TRUE
cg00183606	-0.162181	0.659627	-9.25914	7.50104e-18	7.73501e-16	29.4973	0.590823	0.753004	0.162181	2	84517474	F	II	LOC388965	TSS1500	shore	TSS1500-shore	chr2:84517714-84517951	NA	NA		rs35523171
cg20003124	-0.154105	0.66982	-9.25796	7.56392e-18	7.78872e-16	29.4891	0.604442	0.758547	0.154105	12	4557277	R	II		IGR	shelf	IGR-shelf	chr12:4554405-4554624	NA	TRUE
cg27228272	-0.153663	0.513466	-9.25633	7.65127e-18	7.86295e-16	29.4777	0.448276	0.601939	0.153663	2	127772338	F	II		IGR	opensea	IGR-opensea		TRUE	TRUE		rs67396441
cg11874882	-0.153151	0.566895	-9.25595	7.67179e-18	7.8773e-16	29.4751	0.501922	0.655073	0.153151	17	31910113	R	II	ACCN1	Body	opensea	Body-opensea		NA	TRUE
cg25863289	-0.19081	0.662922	-9.2516	7.91096e-18	8.09061e-16	29.4447	0.581973	0.772783	0.19081	15	102193416	F	I	TM2D3	TSS1500	shore	TSS1500-shore	chr15:102192165-102193345	NA	NA
cg06127174	-0.192937	0.776154	-9.2476	8.13781e-18	8.30847e-16	29.4167	0.694302	0.887239	0.192937	15	25472950	R	I	SNORD115-15	Body	opensea	Body-opensea		NA	NA
cg01098955	-0.164376	0.585349	-9.24674	8.18734e-18	8.35195e-16	29.4107	0.515614	0.67999	0.164376	14	106322163	R	II		IGR	shore	IGR-shore	chr14:106321750-106322002	NA	NA
cg25257905	-0.175396	0.733268	-9.24587	8.2377e-18	8.39136e-16	29.4046	0.658858	0.834254	0.175396	19	57335807	F	I	PEG3	5'UTR	opensea	5'UTR-opensea		NA	NA
cg22601108	-0.173169	0.520373	-9.24583	8.23994e-18	8.39136e-16	29.4044	0.446907	0.620077	0.173169	1	158723939	F	II	OR6K6	TSS1500	opensea	TSS1500-opensea		NA	NA
cg01933248	-0.164722	0.552609	-9.24575	8.24492e-18	8.39406e-16	29.4038	0.482727	0.647449	0.164722	2	418573	F	II		IGR	shore	IGR-shore	chr2:420051-421142	NA	NA
cg09907068	-0.152298	0.531414	-9.24506	8.28484e-18	8.42993e-16	29.399	0.466803	0.619101	0.152298	2	197159060	R	II	HECW2	Body	opensea	Body-opensea		TRUE	TRUE
cg15299888	-0.151506	0.620268	-9.24062	8.54892e-18	8.66928e-16	29.3679	0.555993	0.707499	0.151506	18	75680806	F	II		IGR	opensea	IGR-opensea		NA	NA
cg26429674	-0.207834	0.610968	-9.23894	8.65051e-18	8.75998e-16	29.3562	0.522796	0.73063	0.207834	20	60470267	R	I	CDH4	Body	island	Body-island	chr20:60470080-60470335	NA	NA
cg25137787	-0.186758	0.551632	-9.2371	8.7635e-18	8.85946e-16	29.3434	0.472401	0.659159	0.186758	1	2863815	R	I		IGR	opensea	IGR-opensea		NA	NA
cg06380820	-0.168299	0.615514	-9.23681	8.7816e-18	8.8703e-16	29.3413	0.544114	0.712413	0.168299	10	134698765	F	II		IGR	island	IGR-island	chr10:134698653-134698968	NA	NA
cg25434272	-0.15647	0.60985	-9.23314	9.01202e-18	9.07254e-16	29.3157	0.543468	0.699939	0.15647	10	117697078	F	II	ATRNL1	Body	opensea	Body-opensea		NA	TRUE		rs11197478
cg16492510	-0.170967	0.486889	-9.23188	9.09254e-18	9.14849e-16	29.3069	0.414357	0.585324	0.170967	7	157561684	F	II	PTPRN2	Body	shore	Body-shore	chr7:157560974-157561195	NA	NA
cg07283816	-0.157103	0.510791	-9.22895	9.28252e-18	9.31106e-16	29.2865	0.444141	0.601244	0.157103	12	115455263	F	II		IGR	opensea	IGR-opensea		NA	TRUE
cg26446294	-0.151799	0.559074	-9.22636	9.45372e-18	9.45648e-16	29.2684	0.494675	0.646474	0.151799	2	130559194	F	II		IGR	opensea	IGR-opensea		NA	TRUE
cg08624093	-0.203893	0.68138	-9.22331	9.65903e-18	9.63244e-16	29.2471	0.59488	0.798773	0.203893	1	2733491	F	I		IGR	opensea	IGR-opensea		NA	NA		rs35156402
cg11273493	-0.161941	0.686799	-9.22151	9.78269e-18	9.74498e-16	29.2345	0.618097	0.780038	0.161941	8	10928985	R	II	XKR6	Body	island	Body-island	chr8:10928984-10929211	NA	NA
cg19479935	-0.160508	0.688895	-9.21244	1.04281e-17	1.03422e-15	29.1713	0.620801	0.781309	0.160508	7	155895608	R	II		IGR	shelf	IGR-shelf	chr7:155898140-155898386	NA	NA
cg17070064	-0.164611	0.551313	-9.21196	1.04633e-17	1.03714e-15	29.168	0.481478	0.646089	0.164611	13	112554681	R	I		IGR	opensea	IGR-opensea		NA	NA		rs2295981
cg18398753	0.168268	0.590275	9.20315	1.11332e-17	1.09782e-15	29.1065	0.661661	0.493393	-0.168268	1	180950955	F	II	STX6	Body	opensea	Body-opensea		NA	TRUE
cg23856293	-0.172388	0.644486	-9.20221	1.12075e-17	1.10453e-15	29.1	0.571351	0.743739	0.172388	20	62795341	F	II	MYT1	TSS1500	opensea	TSS1500-opensea		NA	NA
cg08909914	-0.163917	0.605736	-9.20192	1.12302e-17	1.10616e-15	29.098	0.536196	0.700112	0.163917	8	50892893	F	II	SNTG1	5'UTR	opensea	5'UTR-opensea		NA	NA
cg19341849	-0.164846	0.583021	-9.19637	1.1678e-17	1.14714e-15	29.0593	0.513087	0.677933	0.164846	4	1504542	F	II		IGR	shore	IGR-shore	chr4:1505254-1505560	NA	NA
cg02484127	-0.175289	0.513911	-9.19461	1.18235e-17	1.1589e-15	29.047	0.439546	0.614835	0.175289	3	128723005	F	I	CCDC48	Body	island	Body-island	chr3:128722283-128723036	NA	NA
cg13909949	-0.198031	0.696093	-9.19211	1.20339e-17	1.17729e-15	29.0296	0.61208	0.810111	0.198031	20	59173606	F	II		IGR	opensea	IGR-opensea		NA	NA
cg21124476	-0.166691	0.650541	-9.19148	1.20873e-17	1.18186e-15	29.0252	0.579823	0.746514	0.166691	2	466990	R	II		IGR	shore	IGR-shore	chr2:467849-468659	NA	NA
cg13315995	-0.173306	0.598372	-9.18834	1.23568e-17	1.20482e-15	29.0034	0.524849	0.698155	0.173306	20	54828009	R	II		IGR	shelf	IGR-shelf	chr20:54824312-54824584	NA	NA
cg08957001	-0.206011	0.639741	-9.18832	1.23589e-17	1.20482e-15	29.0032	0.552342	0.758354	0.206011	8	143333654	R	II	TSNARE1	Body	shore	Body-shore	chr8:143333047-143333519	NA	NA
cg26900781	-0.161139	0.632828	-9.18616	1.25482e-17	1.21998e-15	28.9881	0.564466	0.725605	0.161139	4	47038032	R	II	GABRB1	Body	shelf	Body-shelf	chr4:47034427-47034940	NA	NA
cg16151261	-0.152961	0.485655	-9.18437	1.27072e-17	1.23212e-15	28.9757	0.420763	0.573724	0.152961	18	75691297	R	I		IGR	shore	IGR-shore	chr18:75690494-75690901	NA	NA
cg07950803	-0.165752	0.581505	-9.17789	1.33001e-17	1.28546e-15	28.9306	0.511186	0.676939	0.165752	1	158223934	F	II	CD1A	1stExon	opensea	1stExon-opensea		NA	NA
cg15797102	-0.157328	0.680658	-9.17457	1.36142e-17	1.3137e-15	28.9075	0.613913	0.771241	0.157328	4	17158272	F	II		IGR	opensea	IGR-opensea		NA	TRUE
cg04757991	-0.162481	0.614567	-9.16943	1.4115e-17	1.35839e-15	28.8717	0.545635	0.708116	0.162481	10	133208984	F	II		IGR	opensea	IGR-opensea		NA	NA
cg02569740	-0.164801	0.643024	-9.16815	1.42425e-17	1.3692e-15	28.8628	0.573108	0.737909	0.164801	8	10878898	F	II	XKR6	Body	opensea	Body-opensea		NA	TRUE
cg15533453	-0.190869	0.742892	-9.16685	1.43738e-17	1.38035e-15	28.8537	0.661918	0.852786	0.190869	10	2542242	F	I		IGR	shore	IGR-shore	chr10:2543463-2544121	NA	NA
cg10976626	-0.175949	0.640507	-9.16452	1.4611e-17	1.40052e-15	28.8375	0.565862	0.741811	0.175949	1	158322841	F	II	CD1E	TSS1500	opensea	TSS1500-opensea		NA	NA
cg11726507	-0.171021	0.619236	-9.16356	1.47096e-17	1.4091e-15	28.8309	0.546682	0.717703	0.171021	14	101155519	R	II		IGR	opensea	IGR-opensea		TRUE	TRUE
cg10375954	0.153214	0.405595	9.16354	1.47123e-17	1.4091e-15	28.8307	0.470595	0.317381	-0.153214	1	6419608	F	II	ACOT7	Body	opensea	Body-opensea		TRUE	TRUE
cg07719965	-0.158974	0.624702	-9.15724	1.53778e-17	1.46855e-15	28.7869	0.557259	0.716233	0.158974	15	24919600	R	II	C15orf2	TSS1500	shore	TSS1500-shore	chr15:24920613-24921252	NA	NA
cg19928493	-0.179411	0.510749	-9.15689	1.54155e-17	1.47176e-15	28.7845	0.434635	0.614047	0.179411	15	87667390	F	I		IGR	opensea	IGR-opensea		NA	NA		rs76322249
cg06456717	-0.164354	0.476564	-9.15241	1.59084e-17	1.51361e-15	28.7534	0.406838	0.571193	0.164354	18	12092942	R	I		IGR	shore	IGR-shore	chr18:12093607-12093842	TRUE	NA
cg08417719	-0.16905	0.658839	-9.14577	1.66685e-17	1.57926e-15	28.7072	0.587121	0.756171	0.16905	11	123814620	R	II	OR6T1	TSS200	opensea	TSS200-opensea		NA	NA
cg23817981	0.168194	0.330764	9.14271	1.70294e-17	1.60796e-15	28.686	0.402119	0.233924	-0.168194	3	32993063	F	II	CCR4	TSS200	opensea	TSS200-opensea		NA	NA		rs74340335
cg21342392	-0.177287	0.519404	-9.14149	1.71768e-17	1.61933e-15	28.6775	0.444191	0.621478	0.177287	7	111203008	F	II	IMMP2L	TSS1500	shore	TSS1500-shore	chr7:111202079-111202683	NA	NA			rs79514222
cg01417037	-0.178182	0.495115	-9.13235	1.83141e-17	1.71667e-15	28.614	0.419523	0.597705	0.178182	5	4244675	F	II		IGR	opensea	IGR-opensea		NA	TRUE
cg02561912	0.179606	0.375254	9.13134	1.84441e-17	1.72572e-15	28.607	0.45145	0.271844	-0.179606	20	50158202	F	II	NFATC2	Body	shore	Body-shore	chr20:50158904-50159509	TRUE	TRUE
cg02081019	0.154775	0.522392	9.1284	1.88284e-17	1.75802e-15	28.5866	0.588054	0.433279	-0.154775	5	92930813	R	I		IGR	island	IGR-island	chr5:92930529-92930830	NA	NA
cg01343097	-0.171759	0.608875	-9.1264	1.9095e-17	1.78062e-15	28.5727	0.536007	0.707766	0.171759	1	248284971	F	II	OR2M1P	TSS1500	opensea	TSS1500-opensea		NA	NA
cg15873474	-0.15327	0.45072	-9.12621	1.91209e-17	1.78257e-15	28.5714	0.385696	0.538967	0.15327	20	60445998	R	II	CDH4	Body	shelf	Body-shelf	chr20:60448775-60449063	NA	NA
cg05164181	-0.159334	0.614232	-9.1253	1.92428e-17	1.79254e-15	28.5651	0.546636	0.70597	0.159334	15	95287886	F	II		IGR	opensea	IGR-opensea		NA	TRUE
cg12460175	-0.150361	0.558655	-9.12439	1.9366e-17	1.80355e-15	28.5588	0.494865	0.645226	0.150361	22	18268062	R	I		IGR	island	IGR-island	chr22:18267968-18268250	TRUE	NA
cg10999347	-0.185845	0.59085	-9.12024	1.99377e-17	1.85201e-15	28.53	0.512007	0.697852	0.185845	2	2605463	R	II		IGR	opensea	IGR-opensea		NA	NA
cg06184325	-0.164832	0.602565	-9.12016	1.99492e-17	1.8526e-15	28.5294	0.532636	0.697468	0.164832	1	2863098	F	I		IGR	opensea	IGR-opensea		NA	NA		rs4648442
cg07720865	-0.159202	0.491831	-9.11772	2.02931e-17	1.88066e-15	28.5125	0.42429	0.583492	0.159202	2	103352342	F	II	MFSD9	Body	shore	Body-shore	chr2:103353138-103353414	NA	NA
cg07053177	-0.163397	0.644262	-9.11569	2.05844e-17	1.90521e-15	28.4984	0.574942	0.738339	0.163397	12	128899814	R	II	TMEM132C	Body	island	Body-island	chr12:128899813-128900065	NA	NA
cg06531624	-0.159505	0.711833	-9.11489	2.06998e-17	1.9154e-15	28.4929	0.644164	0.80367	0.159505	16	1111117	R	I		IGR	island	IGR-island	chr16:1110905-1111227	NA	NA
cg19673440	-0.160182	0.581301	-9.10874	2.1612e-17	1.99316e-15	28.4502	0.513345	0.673527	0.160182	2	2402353	R	II		IGR	opensea	IGR-opensea		NA	NA
cg22688241	-0.167933	0.662767	-9.10789	2.17415e-17	2.00305e-15	28.4443	0.591523	0.759456	0.167933	12	55369150	R	II	KIAA0748	5'UTR	opensea	5'UTR-opensea		NA	NA
cg05238276	-0.152896	0.640958	-9.10637	2.19736e-17	2.02288e-15	28.4338	0.576093	0.728989	0.152896	10	130084439	F	II		IGR	opensea	IGR-opensea		NA	NA
cg01055386	-0.193237	0.655184	-9.10443	2.22752e-17	2.04855e-15	28.4203	0.573205	0.766442	0.193237	12	128900228	R	II	TMEM132C	Body	shore	Body-shore	chr12:128899813-128900065	NA	NA
cg18826352	-0.166995	0.637844	-9.10364	2.23985e-17	2.05832e-15	28.4149	0.566998	0.733993	0.166995	20	57765900	R	II	ZNF831	TSS200	shore	TSS200-shore	chr20:57766396-57767896	NA	NA
cg24575705	-0.165581	0.595736	-9.1033	2.24515e-17	2.06214e-15	28.4125	0.525489	0.69107	0.165581	10	122220743	F	II	PPAPDC1A	Body	shelf	Body-shelf	chr10:122216259-122217377	TRUE	NA
cg06550539	-0.186255	0.636645	-9.10049	2.28978e-17	2.09725e-15	28.393	0.557628	0.743883	0.186255	10	134698937	R	I		IGR	island	IGR-island	chr10:134698653-134698968	NA	NA
cg18458373	-0.15237	0.646563	-9.09665	2.35225e-17	2.14799e-15	28.3664	0.581922	0.734292	0.15237	5	169483281	R	II	DOCK2	Body	opensea	Body-opensea		NA	NA
cg08835992	-0.176941	0.56494	-9.09563	2.36905e-17	2.16216e-15	28.3594	0.489874	0.666815	0.176941	11	7870404	R	II	OR5E1P	TSS200	opensea	TSS200-opensea		NA	NA
cg27364741	0.154836	0.524977	9.09482	2.38259e-17	2.17342e-15	28.3537	0.590664	0.435829	-0.154836	2	63281069	R	I	OTX1	Body	island	Body-island	chr2:63281034-63281347	NA	NA
cg20410409	-0.184546	0.63574	-9.09273	2.4176e-17	2.20202e-15	28.3393	0.557447	0.741993	0.184546	1	158724057	R	II	OR6K6	TSS1500	opensea	TSS1500-opensea		NA	NA
cg24995678	-0.199542	0.488347	-9.09246	2.42231e-17	2.20463e-15	28.3374	0.403693	0.603235	0.199542	2	235936394	R	I	SH3BP4	5'UTR	opensea	5'UTR-opensea		TRUE	NA
cg16027403	-0.178037	0.631785	-9.09237	2.42374e-17	2.20537e-15	28.3368	0.556254	0.734291	0.178037	1	247978791	F	II	OR14A16	1stExon	opensea	1stExon-opensea		NA	NA
cg26075742	-0.199948	0.619203	-9.08923	2.4776e-17	2.24871e-15	28.3151	0.534377	0.734324	0.199948	8	10753237	F	I		IGR	opensea	IGR-opensea		NA	NA		rs78772077
cg25104107	-0.163819	0.490097	-9.08901	2.48142e-17	2.25065e-15	28.3135	0.420598	0.584417	0.163819	1	152731590	F	II	KPRP	5'UTR	shore	5'UTR-shore	chr1:152732958-152733338	NA	NA		rs78699479
cg16313485	-0.204471	0.727284	-9.08766	2.50495e-17	2.27011e-15	28.3042	0.640539	0.845009	0.204471	12	130434373	F	I		IGR	opensea	IGR-opensea		NA	NA		rs35292395
cg00633740	-0.163859	0.5897	-9.08598	2.5347e-17	2.29591e-15	28.2925	0.520184	0.684043	0.163859	20	57879905	F	II	EDN3	Body	shelf	Body-shelf	chr20:57875317-57876126	NA	NA
cg20418125	-0.158873	0.610166	-9.08556	2.54216e-17	2.30184e-15	28.2896	0.542765	0.701638	0.158873	11	133099168	F	II	OPCML	Body	opensea	Body-opensea		NA	TRUE
cg05460486	-0.170738	0.641106	-9.08315	2.58533e-17	2.33766e-15	28.2729	0.568672	0.73941	0.170738	2	53331760	R	II		IGR	opensea	IGR-opensea		NA	TRUE
cg10673833	0.153149	0.640791	9.07778	2.68434e-17	2.42232e-15	28.2358	0.705763	0.552614	-0.153149	7	45018849	R	I	MYO1G	TSS200	opensea	TSS200-opensea		NA	NA
cg00804796	-0.154917	0.631773	-9.07602	2.7175e-17	2.44857e-15	28.2236	0.566051	0.720968	0.154917	13	112624756	F	II		IGR	shelf	IGR-shelf	chr13:112627428-112627642	NA	NA
cg11243283	-0.156026	0.519297	-9.07521	2.733e-17	2.4613e-15	28.218	0.453104	0.60913	0.156026	10	109910629	F	II		IGR	opensea	IGR-opensea		NA	TRUE
cg02202411	-0.175572	0.603981	-9.07437	2.74916e-17	2.47338e-15	28.2122	0.529496	0.705068	0.175572	5	6338418	F	II	FLJ33360	TSS1500	opensea	TSS1500-opensea		NA	NA		rs61278503
cg08864283	-0.181437	0.773001	-9.07145	2.80584e-17	2.51747e-15	28.192	0.696028	0.877464	0.181437	16	613142	R	I	C16orf11	5'UTR	shore	5'UTR-shore	chr16:614792-615095	NA	NA
cg25012143	-0.163439	0.661269	-9.06837	2.86691e-17	2.56715e-15	28.1707	0.591931	0.75537	0.163439	2	117814536	F	II		IGR	opensea	IGR-opensea		NA	NA		rs893257
cg18460938	-0.162129	0.62716	-9.0672	2.89043e-17	2.58629e-15	28.1626	0.558378	0.720507	0.162129	15	86842630	R	II	AGBL1	Body	opensea	Body-opensea		NA	TRUE
cg19790509	-0.189682	0.700414	-9.06707	2.89298e-17	2.58793e-15	28.1617	0.619943	0.809625	0.189682	12	130040893	F	I	TMEM132D	Body	opensea	Body-opensea		NA	NA
cg05446539	-0.15075	0.60702	-9.06665	2.90167e-17	2.59441e-15	28.1588	0.543066	0.693816	0.15075	8	976072	F	I		IGR	island	IGR-island	chr8:976015-976416	NA	NA			rs79396889
cg18011672	0.182274	0.540558	9.06632	2.9083e-17	2.59969e-15	28.1565	0.617886	0.435612	-0.182274	2	190522601	F	II		IGR	shelf	IGR-shelf	chr2:190526058-190526419	NA	NA
cg24567598	-0.154114	0.665176	-9.0644	2.94766e-17	2.62901e-15	28.1432	0.599794	0.753908	0.154114	13	112287380	R	II		IGR	opensea	IGR-opensea		NA	NA
cg17538768	-0.158897	0.705238	-9.06407	2.95442e-17	2.63439e-15	28.1409	0.637827	0.796724	0.158897	11	123626540	R	II	OR6X1	TSS1500	opensea	TSS1500-opensea		NA	NA
cg01815783	-0.150752	0.550866	-9.06369	2.96235e-17	2.64016e-15	28.1383	0.48691	0.637662	0.150752	4	1047043	F	II		IGR	shelf	IGR-shelf	chr4:1049652-1049923	TRUE	TRUE
cg11147094	-0.158122	0.694612	-9.06316	2.97327e-17	2.6454e-15	28.1346	0.62753	0.785652	0.158122	15	88420438	F	II	NTRK3	Body	opensea	Body-opensea		NA	TRUE		rs78443344	rs67749939
cg23163283	-0.171859	0.61799	-9.0625	2.98711e-17	2.65565e-15	28.13	0.54508	0.716939	0.171859	17	22016686	F	I		IGR	shore	IGR-shore	chr17:22016769-22017189	NA	NA
cg02532923	-0.152268	0.624791	-9.06222	2.99287e-17	2.66012e-15	28.1281	0.560193	0.712461	0.152268	16	89110004	F	II		IGR	shore	IGR-shore	chr16:89108886-89109130	NA	NA		rs77197286
cg19907968	-0.181454	0.578302	-9.06216	2.99416e-17	2.66061e-15	28.1277	0.501321	0.682775	0.181454	7	1560598	R	II		IGR	opensea	IGR-opensea		TRUE	NA
cg11454300	-0.153344	0.541701	-9.06193	2.99895e-17	2.66421e-15	28.1261	0.476647	0.62999	0.153344	2	2256402	R	II	MYT1L	5'UTR	opensea	5'UTR-opensea		NA	TRUE
cg00134787	-0.153352	0.590131	-9.05976	3.04466e-17	2.70016e-15	28.1112	0.525073	0.678424	0.153352	17	10419499	R	II	MYH1	Body	opensea	Body-opensea		NA	NA
cg27224069	-0.218847	0.663765	-9.05803	3.08172e-17	2.73034e-15	28.0992	0.570921	0.789768	0.218847	17	32612799	F	I	CCL11	1stExon	opensea	1stExon-opensea		NA	TRUE		rs56120942
cg24694502	-0.163711	0.564799	-9.0567	3.11063e-17	2.75258e-15	28.09	0.495346	0.659057	0.163711	1	4736187	F	I	AJAP1	Body	opensea	Body-opensea		NA	NA
cg25611750	-0.159843	0.650236	-9.05566	3.13317e-17	2.7698e-15	28.0828	0.582424	0.742267	0.159843	14	101755656	R	II		IGR	opensea	IGR-opensea		NA	TRUE
cg17388712	-0.186104	0.603309	-9.05032	3.25242e-17	2.86818e-15	28.0459	0.524355	0.710459	0.186104	7	50889487	R	II		IGR	opensea	IGR-opensea		NA	TRUE
cg14181956	0.154085	0.350996	9.04894	3.28378e-17	2.89443e-15	28.0364	0.416365	0.26228	-0.154085	14	93532563	F	II	ITPK1	Body	opensea	Body-opensea		NA	NA
cg23111544	-0.157019	0.645689	-9.04803	3.30474e-17	2.91076e-15	28.0301	0.579075	0.736094	0.157019	2	79347474	F	II	REG1A	TSS200	opensea	TSS200-opensea		NA	NA		rs283889
cg24706674	-0.150139	0.595126	-9.04427	3.39263e-17	2.9784e-15	28.0041	0.531431	0.68157	0.150139	10	134679704	F	II		IGR	shelf	IGR-shelf	chr10:134682700-134682917	NA	NA
cg08519008	-0.15605	0.553879	-9.04191	3.44905e-17	3.01942e-15	27.9878	0.487676	0.643727	0.15605	11	123815202	R	II	OR6T1	TSS1500	opensea	TSS1500-opensea		NA	NA
cg22827685	-0.159961	0.585522	-9.04032	3.48767e-17	3.04879e-15	27.9768	0.51766	0.677621	0.159961	12	117768981	R	II	NOS1	5'UTR	opensea	5'UTR-opensea		NA	NA
cg15642035	-0.162219	0.514396	-9.03877	3.52563e-17	3.08048e-15	27.9661	0.445575	0.607795	0.162219	8	139165052	F	II	FAM135B	Body	opensea	Body-opensea		NA	NA		rs3763590
cg24580655	-0.165577	0.554171	-9.03867	3.52807e-17	3.08112e-15	27.9654	0.483926	0.649504	0.165577	1	159145638	R	II	CADM3	Body	shelf	Body-shelf	chr1:159141202-159141718	NA	NA
cg05400869	-0.151306	0.560042	-9.03798	3.54508e-17	3.09523e-15	27.9606	0.495851	0.647157	0.151306	1	153413932	F	II	S100A7L2	TSS1500	opensea	TSS1500-opensea		NA	NA
cg03528325	-0.171283	0.610384	-9.03659	3.5796e-17	3.12159e-15	27.9511	0.537718	0.709001	0.171283	1	158223921	F	II	CD1A	TSS200	opensea	TSS200-opensea		NA	NA
cg08817204	-0.157621	0.694914	-9.03499	3.61984e-17	3.15515e-15	27.94	0.628045	0.785666	0.157621	10	83665199	R	II	NRG3	Body	opensea	Body-opensea		NA	TRUE
cg01041256	-0.153126	0.62622	-9.03414	3.64133e-17	3.17005e-15	27.9341	0.561258	0.714384	0.153126	15	27125580	F	II	GABRA5	Body	shelf	Body-shelf	chr15:27128249-27128935	NA	NA
cg06679878	-0.156723	0.527235	-9.03314	3.66681e-17	3.18761e-15	27.9272	0.460747	0.61747	0.156723	12	130335340	R	II	TMEM132D	Body	opensea	Body-opensea		NA	NA
cg11008003	-0.179239	0.604192	-9.03055	3.73376e-17	3.24113e-15	27.9093	0.528151	0.70739	0.179239	7	157255264	R	I		IGR	opensea	IGR-opensea		NA	NA
cg12022102	-0.157514	0.667925	-9.02708	3.82528e-17	3.31207e-15	27.8854	0.601101	0.758615	0.157514	3	130068026	R	II	COL29A1	5'UTR	shelf	5'UTR-shelf	chr3:130064574-130064840	NA	NA
cg18764814	-0.160588	0.528533	-9.02413	3.90481e-17	3.37417e-15	27.865	0.460405	0.620993	0.160588	5	1974131	F	II		IGR	opensea	IGR-opensea		NA	NA
cg01264332	-0.15284	0.748362	-9.02292	3.93791e-17	3.40033e-15	27.8567	0.683521	0.836361	0.15284	12	4405469	R	II	CCND2	Body	opensea	Body-opensea		NA	NA
cg23975975	-0.164589	0.633465	-9.02093	3.99282e-17	3.44444e-15	27.843	0.563639	0.728228	0.164589	18	76192780	R	II		IGR	shore	IGR-shore	chr18:76190598-76190862	NA	NA
cg08024169	-0.161525	0.706361	-9.01106	4.27737e-17	3.66448e-15	27.7749	0.637836	0.79936	0.161525	7	1365082	F	I		IGR	shore	IGR-shore	chr7:1362811-1363643	NA	NA		rs73266573
cg02478603	-0.158792	0.571418	-9.011	4.27888e-17	3.66491e-15	27.7745	0.504052	0.662844	0.158792	1	158301451	R	II	CD1B	TSS200	opensea	TSS200-opensea		NA	NA
cg04546999	-0.169621	0.513923	-9.00682	4.40542e-17	3.75988e-15	27.7457	0.441962	0.611583	0.169621	1	152956429	R	II	SPRR1A	TSS200	opensea	TSS200-opensea		NA	NA			rs1611755
cg06987132	-0.161786	0.673471	-9.00599	4.43118e-17	3.77919e-15	27.74	0.604834	0.76662	0.161786	12	132886453	R	I	GALNT9	Body	shore	Body-shore	chr12:132885388-132885592	NA	NA
cg12059258	-0.164736	0.624564	-9.00477	4.46881e-17	3.80768e-15	27.7316	0.554676	0.719411	0.164736	10	107899066	F	II		IGR	opensea	IGR-opensea		NA	NA
cg02708121	-0.167551	0.585855	-9.001	4.58773e-17	3.89795e-15	27.7056	0.514772	0.682323	0.167551	4	16670376	F	II	LDB2	Body	opensea	Body-opensea		NA	TRUE
cg17341136	-0.190035	0.606193	-8.99966	4.6308e-17	3.93269e-15	27.6964	0.525573	0.715608	0.190035	12	132893339	F	I	GALNT9	Body	shelf	Body-shelf	chr12:132896299-132896569	TRUE	NA
cg12565335	-0.16801	0.550535	-8.99923	4.64474e-17	3.9436e-15	27.6934	0.479258	0.647268	0.16801	2	1990242	R	II	MYT1L	5'UTR	opensea	5'UTR-opensea		NA	TRUE
cg09441223	-0.173006	0.70781	-8.9985	4.66832e-17	3.96176e-15	27.6884	0.634414	0.807419	0.173006	16	893989	R	I		IGR	shore	IGR-shore	chr16:894644-895057	NA	NA			rs34817452
cg08101739	-0.164836	0.565162	-8.99827	4.67573e-17	3.96618e-15	27.6868	0.495232	0.660068	0.164836	1	152815158	F	II	LCE6A	TSS200	opensea	TSS200-opensea		NA	NA			rs80140568
cg09664215	-0.164094	0.545971	-8.99708	4.7149e-17	3.99752e-15	27.6786	0.476355	0.640449	0.164094	1	158325254	R	II	CD1E	Body	opensea	Body-opensea		NA	NA
cg14652646	-0.168988	0.664045	-8.9961	4.74696e-17	4.01919e-15	27.6719	0.592353	0.761341	0.168988	4	16847844	R	II	LDB2	Body	opensea	Body-opensea		NA	TRUE
cg08012275	-0.155862	0.654532	-8.99572	4.75971e-17	4.02887e-15	27.6692	0.588409	0.744271	0.155862	11	1464300	F	I	BRSK2	Body	island	Body-island	chr11:1464295-1464899	NA	NA
cg13636096	-0.163549	0.669138	-8.99524	4.77562e-17	4.04139e-15	27.6659	0.599754	0.763302	0.163549	10	2815015	R	I		IGR	island	IGR-island	chr10:2815003-2815469	NA	NA
cg06836656	-0.159942	0.578326	-8.99095	4.92036e-17	4.15413e-15	27.6364	0.510471	0.670414	0.159942	1	2876347	R	II		IGR	shore	IGR-shore	chr1:2876545-2876808	NA	NA
cg17273384	-0.164237	0.597799	-8.98922	4.97984e-17	4.20139e-15	27.6245	0.528122	0.692359	0.164237	15	86685026	F	II	AGBL1	TSS1500	opensea	TSS1500-opensea		NA	NA
cg16728539	-0.154701	0.413301	-8.98716	5.05178e-17	4.25711e-15	27.6103	0.34767	0.502371	0.154701	12	2451169	F	II	CACNA1C	Body	opensea	Body-opensea		NA	TRUE
cg00277753	-0.150352	0.577905	-8.98542	5.11344e-17	4.30204e-15	27.5983	0.514119	0.664471	0.150352	10	134918927	F	I	GPR123	Body	island	Body-island	chr10:134918755-134918975	NA	NA
cg18690705	-0.15256	0.745134	-8.98344	5.18431e-17	4.3515e-15	27.5847	0.680411	0.832971	0.15256	2	80547658	R	II	CTNNA2	Body	shore	Body-shore	chr2:80549578-80549798	NA	NA
cg16560389	-0.240025	0.693363	-8.98305	5.19843e-17	4.3603e-15	27.582	0.591534	0.831559	0.240025	10	133318201	R	I		IGR	island	IGR-island	chr10:133318028-133318324	NA	NA
cg23643466	-0.20326	0.626889	-8.97793	5.38718e-17	4.50605e-15	27.5467	0.540658	0.743918	0.20326	10	132284906	R	I		IGR	opensea	IGR-opensea		NA	NA
cg24251942	-0.1749	0.734856	-8.97774	5.39417e-17	4.51085e-15	27.5455	0.660656	0.835556	0.1749	15	88576320	R	I	NTRK3	Body	opensea	Body-opensea		NA	NA
cg00596687	-0.182045	0.582624	-8.97652	5.44013e-17	4.54295e-15	27.5371	0.505392	0.687438	0.182045	20	61151472	R	I	C20orf166	Body	shore	Body-shore	chr20:61151586-61151903	NA	NA
cg02803828	-0.15291	0.664184	-8.97009	5.68905e-17	4.72674e-15	27.4928	0.599313	0.752223	0.15291	2	125180279	R	II	CNTNAP5	Body	opensea	Body-opensea		NA	NA
cg21029504	-0.151809	0.696242	-8.96684	5.81913e-17	4.82814e-15	27.4705	0.631839	0.783648	0.151809	22	50028390	R	I	C22orf34	Body	shore	Body-shore	chr22:50025085-50026415	NA	NA
cg07333545	0.165826	0.467653	8.96315	5.97015e-17	4.94547e-15	27.4451	0.538003	0.372177	-0.165826	6	52170606	F	II		IGR	shore	IGR-shore	chr6:52171922-52172147	NA	NA
cg00241002	-0.16574	0.393283	-8.9614	6.04327e-17	5.00259e-15	27.4331	0.322969	0.488709	0.16574	10	26931912	R	I	LOC731789	TSS200	opensea	TSS200-opensea		NA	NA
cg19608778	-0.165144	0.634733	-8.9605	6.08102e-17	5.03269e-15	27.4269	0.564672	0.729816	0.165144	11	1939546	F	I	TNNT3	TSS1500	opensea	TSS1500-opensea		NA	NA
cg01417364	-0.153071	0.642135	-8.95778	6.1973e-17	5.116e-15	27.4082	0.577195	0.730267	0.153071	12	128540887	R	II		IGR	opensea	IGR-opensea		NA	TRUE
cg02490589	-0.171057	0.719222	-8.9553	6.30479e-17	5.19232e-15	27.3912	0.646652	0.817709	0.171057	1	158944784	R	II	PYHIN1	Body	opensea	Body-opensea		NA	NA
cg06911744	-0.196578	0.608181	-8.9552	6.30939e-17	5.19426e-15	27.3905	0.524784	0.721362	0.196578	1	3276507	F	I	PRDM16	Body	shore	Body-shore	chr1:3275029-3275284	NA	NA
cg04068564	-0.195829	0.613825	-8.95485	6.32459e-17	5.20558e-15	27.3881	0.530746	0.726575	0.195829	20	57795246	F	II	ZNF831	Body	shore	Body-shore	chr20:57797223-57797441	NA	NA
cg03219658	-0.15694	0.545576	-8.95369	6.37574e-17	5.23812e-15	27.3801	0.478995	0.635935	0.15694	12	114863053	F	II		IGR	opensea	IGR-opensea		NA	TRUE
cg09440150	-0.170425	0.56866	-8.95304	6.40461e-17	5.25944e-15	27.3756	0.496358	0.666783	0.170425	5	6159585	R	II		IGR	opensea	IGR-opensea		NA	TRUE
cg05049825	-0.155714	0.56193	-8.95218	6.44317e-17	5.28629e-15	27.3697	0.49587	0.651584	0.155714	2	124944568	F	II	CNTNAP5	Body	opensea	Body-opensea		NA	TRUE
cg27169860	-0.192506	0.708206	-8.94861	6.60479e-17	5.40536e-15	27.3452	0.626537	0.819043	0.192506	2	66218712	F	I		IGR	opensea	IGR-opensea		NA	TRUE
cg01792430	-0.15214	0.532365	-8.94778	6.64304e-17	5.43419e-15	27.3395	0.46782	0.61996	0.15214	2	29388414	R	II	CLIP4	Body	opensea	Body-opensea		NA	TRUE		rs73920718
cg14573268	-0.164414	0.676996	-8.9471	6.67453e-17	5.45747e-15	27.3348	0.607245	0.771659	0.164414	5	165063158	F	II		IGR	opensea	IGR-opensea		NA	TRUE
cg18294332	0.180335	0.468405	8.94312	6.86165e-17	5.59778e-15	27.3075	0.544911	0.364576	-0.180335	5	56148274	F	II	MAP3K1	Body	opensea	Body-opensea		NA	TRUE
cg05138768	-0.169807	0.662835	-8.94059	6.98321e-17	5.68666e-15	27.2901	0.590796	0.760602	0.169807	12	127207919	F	II		IGR	shelf	IGR-shelf	chr12:127210778-127211651	NA	NA		rs77644828
cg26995656	-0.161073	0.557927	-8.94023	7.00073e-17	5.69835e-15	27.2876	0.489593	0.650666	0.161073	14	88121644	F	II		IGR	opensea	IGR-opensea		NA	NA		rs28373251
cg08251901	0.165715	0.559635	8.93954	7.0339e-17	5.72276e-15	27.283	0.629938	0.464223	-0.165715	12	15114904	F	II	ARHGDIB	TSS1500	opensea	TSS1500-opensea		NA	NA
cg05845217	-0.176437	0.497747	-8.93324	7.34853e-17	5.95631e-15	27.2397	0.422895	0.599332	0.176437	5	4223202	F	II		IGR	opensea	IGR-opensea		NA	NA		rs11134037
cg25344322	-0.176666	0.655639	-8.93181	7.42187e-17	6.00993e-15	27.2299	0.58069	0.757356	0.176666	13	112575014	R	I		IGR	shore	IGR-shore	chr13:112575723-112575998	NA	NA			rs75520784
cg20378520	-0.164343	0.710618	-8.9311	7.45819e-17	6.03799e-15	27.225	0.640897	0.80524	0.164343	12	125703811	R	II		IGR	opensea	IGR-opensea		NA	TRUE
cg08900158	-0.158069	0.613334	-8.92757	7.64343e-17	6.1824e-15	27.2008	0.546274	0.704343	0.158069	12	132909921	F	II		IGR	shore	IGR-shore	chr12:132910476-132910802	NA	NA
cg10256733	-0.171619	0.652961	-8.92286	7.89705e-17	6.36753e-15	27.1685	0.580153	0.751772	0.171619	2	1879874	R	II	MYT1L	Body	opensea	Body-opensea		NA	NA
cg11144436	-0.175065	0.58583	-8.91817	8.15791e-17	6.56906e-15	27.1363	0.51156	0.686625	0.175065	17	50008372	F	II	CA10	Body	opensea	Body-opensea		NA	NA
cg02870011	-0.165999	0.592168	-8.9175	8.19609e-17	6.59391e-15	27.1317	0.521744	0.687743	0.165999	12	128366140	R	II		IGR	opensea	IGR-opensea		NA	NA
cg24301250	-0.162795	0.662665	-8.91462	8.36136e-17	6.71339e-15	27.112	0.5936	0.756395	0.162795	11	126626136	F	II	KIRREL3	Body	opensea	Body-opensea		NA	TRUE		rs34340613
cg07737175	-0.171712	0.638642	-8.91454	8.36622e-17	6.7143e-15	27.1114	0.565795	0.737506	0.171712	13	112770897	R	I		IGR	opensea	IGR-opensea		NA	NA
cg24888352	-0.152944	0.677402	-8.91325	8.44119e-17	6.76544e-15	27.1026	0.612517	0.765461	0.152944	10	2908597	R	I		IGR	opensea	IGR-opensea		NA	TRUE
cg09135754	-0.18175	0.668243	-8.91297	8.45773e-17	6.77568e-15	27.1007	0.591137	0.772888	0.18175	1	2863146	F	I		IGR	opensea	IGR-opensea		NA	NA
cg16002378	-0.172813	0.734046	-8.91273	8.47141e-17	6.78362e-15	27.0991	0.660731	0.833544	0.172813	14	105036533	R	I		IGR	opensea	IGR-opensea		NA	NA
cg06257038	-0.150354	0.687036	-8.91054	8.60128e-17	6.87388e-15	27.084	0.62325	0.773604	0.150354	12	127268720	F	II		IGR	opensea	IGR-opensea		NA	TRUE
cg12762862	-0.186452	0.632053	-8.90925	8.67833e-17	6.92777e-15	27.0752	0.552952	0.739404	0.186452	20	60120472	R	II	CDH4	Body	shore	Body-shore	chr20:60119507-60119712	NA	NA
cg08856842	-0.239824	0.725425	-8.90818	8.74331e-17	6.97193e-15	27.0678	0.623682	0.863505	0.239824	13	112624688	R	I		IGR	shelf	IGR-shelf	chr13:112627428-112627642	NA	NA
cg05990988	-0.168332	0.50983	-8.90789	8.7609e-17	6.9844e-15	27.0658	0.438417	0.606748	0.168332	5	4223068	F	II		IGR	opensea	IGR-opensea		NA	NA
cg04638205	-0.181406	0.55679	-8.90785	8.76336e-17	6.98482e-15	27.0656	0.479829	0.661236	0.181406	5	3002493	R	II		IGR	opensea	IGR-opensea		NA	NA
cg19212949	-0.188705	0.488312	-8.90776	8.76861e-17	6.98746e-15	27.065	0.408255	0.59696	0.188705	19	57323840	F	I	PEG3	3'UTR	opensea	3'UTR-opensea		NA	NA		rs45600540
cg06051146	-0.156824	0.514455	-8.90707	8.81044e-17	7.01769e-15	27.0603	0.447924	0.604748	0.156824	11	57424284	R	II	CLP1	TSS1500	shore	TSS1500-shore	chr11:57424937-57425262	NA	NA
cg19050555	-0.175282	0.476045	-8.90531	8.91866e-17	7.09762e-15	27.0482	0.401683	0.576965	0.175282	12	49662405	R	II	TUBA1C	Body	shelf	Body-shelf	chr12:49658246-49659175	TRUE	NA
cg11495377	-0.1651	0.627699	-8.90528	8.92069e-17	7.09767e-15	27.048	0.557656	0.722756	0.1651	2	545645	F	II		IGR	opensea	IGR-opensea		NA	NA		rs2724885
cg03564455	-0.167246	0.694839	-8.90191	9.13135e-17	7.24928e-15	27.0249	0.623886	0.791132	0.167246	6	29274096	F	II	OR14J1	TSS1500	opensea	TSS1500-opensea		NA	NA		rs3117427
cg15300436	-0.182085	0.429665	-8.90088	9.19665e-17	7.29791e-15	27.0178	0.352417	0.534502	0.182085	2	2321788	F	I	LOC730811	TSS1500	opensea	TSS1500-opensea		NA	NA
cg01801610	-0.172334	0.700717	-8.89991	9.25879e-17	7.34237e-15	27.0112	0.627605	0.79994	0.172334	14	99101498	F	II		IGR	opensea	IGR-opensea		NA	NA
cg16251205	-0.154746	0.583164	-8.89677	9.46214e-17	7.48092e-15	26.9897	0.517514	0.67226	0.154746	7	153586592	R	II	DPP6	Body	shore	Body-shore	chr7:153583317-153585666	NA	NA
cg13819577	-0.157888	0.666874	-8.89383	9.65678e-17	7.62611e-15	26.9696	0.599892	0.75778	0.157888	1	248512075	R	II	OR14C36	TSS200	opensea	TSS200-opensea		NA	NA		rs28372410
cg25464787	-0.163128	0.620134	-8.89287	9.72087e-17	7.66664e-15	26.963	0.550928	0.714056	0.163128	1	158904784	F	II	PYHIN1	5'UTR	opensea	5'UTR-opensea		NA	NA
cg19269426	0.151481	0.64059	8.89123	9.8323e-17	7.74266e-15	26.9517	0.704855	0.553373	-0.151481	1	235500468	F	II	GGPS1	Body	opensea	Body-opensea		NA	NA
cg06826870	-0.151819	0.53769	-8.89011	9.90848e-17	7.79755e-15	26.9441	0.473282	0.6251	0.151819	12	125811164	F	II	TMEM132B	1stExon	opensea	1stExon-opensea		NA	NA
cg09478478	-0.175097	0.632656	-8.88684	1.01352e-16	7.95686e-15	26.9217	0.558372	0.73347	0.175097	1	158322845	F	II	CD1E	TSS1500	opensea	TSS1500-opensea		NA	NA
cg00182256	-0.180273	0.645447	-8.8809	1.05608e-16	8.25502e-15	26.8811	0.568967	0.749241	0.180273	22	49376518	F	II		IGR	island	IGR-island	chr22:49376395-49376660	NA	NA
cg27523780	-0.154422	0.582714	-8.87978	1.06429e-16	8.31021e-15	26.8734	0.517202	0.671624	0.154422	8	1106743	F	I		IGR	shore	IGR-shore	chr8:1105083-1105435	NA	NA
cg25499121	-0.172828	0.616653	-8.87898	1.0702e-16	8.35451e-15	26.8679	0.543332	0.71616	0.172828	17	50007030	R	II	CA10	Body	opensea	Body-opensea		NA	NA
cg11587635	-0.190715	0.639935	-8.8755	1.09623e-16	8.54666e-15	26.8442	0.559026	0.749741	0.190715	19	35782638	R	I	MAG	TSS1500	shelf	TSS1500-shelf	chr19:35786551-35786962	NA	NA
cg20477160	-0.172799	0.581126	-8.87444	1.1043e-16	8.59839e-15	26.8369	0.507818	0.680617	0.172799	2	235936596	R	II	SH3BP4	5'UTR	opensea	5'UTR-opensea		TRUE	NA
cg18781372	-0.171103	0.621295	-8.87386	1.10876e-16	8.62564e-15	26.8329	0.548706	0.719809	0.171103	3	38937304	R	II	SCN11A	Body	opensea	Body-opensea		NA	NA
cg02711975	-0.16433	0.585009	-8.87353	1.1113e-16	8.64169e-15	26.8307	0.515293	0.679623	0.16433	2	1344122	R	II	SNTG2	Body	opensea	Body-opensea		NA	TRUE
cg03325843	-0.155728	0.632543	-8.87214	1.12202e-16	8.71567e-15	26.8212	0.566476	0.722204	0.155728	12	5598236	R	II	NTF3	Body	opensea	Body-opensea		NA	TRUE
cg15989318	-0.151725	0.670638	-8.87202	1.12296e-16	8.72109e-15	26.8203	0.60627	0.757994	0.151725	10	106426210	F	II	SORCS3	Body	opensea	Body-opensea		NA	NA		rs61194609
cg22466653	-0.15273	0.595115	-8.87031	1.13632e-16	8.81536e-15	26.8087	0.53032	0.683051	0.15273	17	56232357	R	II	OR4D1	TSS200	shore	TSS200-shore	chr17:56234321-56234827	NA	NA
cg03280108	0.153452	0.465139	8.86842	1.15125e-16	8.92155e-15	26.7958	0.53024	0.376788	-0.153452	8	26298067	R	II		IGR	opensea	IGR-opensea		NA	TRUE
cg20837735	-0.158533	0.529787	-8.86502	1.17865e-16	9.10846e-15	26.7725	0.46253	0.621063	0.158533	18	61144177	R	II	SERPINB5	1stExon	opensea	1stExon-opensea		NA	NA
cg08546107	-0.177488	0.728687	-8.86295	1.19566e-16	9.22015e-15	26.7583	0.653389	0.830878	0.177488	12	129636016	F	I	TMEM132D	Body	opensea	Body-opensea		NA	NA
cg17940268	-0.154472	0.584633	-8.85971	1.22273e-16	9.42084e-15	26.7362	0.5191	0.673572	0.154472	1	166124106	R	I	MIR921	TSS200	opensea	TSS200-opensea		NA	NA
cg25673668	-0.150439	0.603733	-8.85863	1.23187e-16	9.4852e-15	26.7288	0.539911	0.690349	0.150439	8	895601	F	II		IGR	shore	IGR-shore	chr8:893459-893760	NA	NA
cg07805542	-0.156179	0.341221	-8.85611	1.25351e-16	9.63738e-15	26.7116	0.274964	0.431142	0.156179	1	9779309	R	I	PIK3CD	Body	shelf	Body-shelf	chr1:9775708-9775997	TRUE	TRUE
cg20268857	-0.177293	0.535342	-8.85453	1.2672e-16	9.73642e-15	26.7009	0.460127	0.63742	0.177293	1	158687431	R	II	OR6K3	1stExon	opensea	1stExon-opensea		NA	NA
cg14913695	0.192141	0.431864	8.85171	1.29218e-16	9.90721e-15	26.6816	0.513378	0.321237	-0.192141	22	50449520	F	II	IL17REL	5'UTR	island	5'UTR-island	chr22:50448567-50449521	NA	NA		rs73183310
cg07052524	-0.197588	0.59368	-8.85119	1.29681e-16	9.94059e-15	26.678	0.509855	0.707442	0.197588	19	40009835	R	I	SELV	3'UTR	shelf	3'UTR-shelf	chr19:40005648-40005869	NA	NA
cg18125814	-0.169628	0.650122	-8.84917	1.31503e-16	1.00632e-14	26.6642	0.578159	0.747786	0.169628	11	49455214	F	II		IGR	shore	IGR-shore	chr11:49455935-49456211	NA	NA
cg08097817	-0.154556	0.576885	-8.84841	1.32194e-16	1.01096e-14	26.6591	0.511316	0.665872	0.154556	21	32255313	F	II	KRTAP11-1	TSS1500	opensea	TSS1500-opensea		NA	NA
cg17861424	-0.155224	0.638709	-8.84781	1.32748e-16	1.01455e-14	26.6549	0.572857	0.72808	0.155224	4	17318093	R	II		IGR	opensea	IGR-opensea		NA	TRUE
cg11300568	-0.172726	0.658104	-8.84624	1.34189e-16	1.02491e-14	26.6442	0.584826	0.757553	0.172726	7	154545101	F	II	DPP6	Body	shelf	Body-shelf	chr7:154542059-154542348	NA	NA
cg23957285	-0.161852	0.537307	-8.84564	1.34745e-16	1.02872e-14	26.6402	0.468642	0.630495	0.161852	19	4558740	R	I	SEMA6B	TSS1500	shore	TSS1500-shore	chr19:4558363-4558579	TRUE	NA
cg17840707	-0.154164	0.544778	-8.84136	1.38785e-16	1.05755e-14	26.6109	0.479376	0.63354	0.154164	15	86951099	R	II	AGBL1	Body	opensea	Body-opensea		NA	TRUE
cg27457631	-0.151606	0.528259	-8.84066	1.39461e-16	1.06202e-14	26.6061	0.463941	0.615547	0.151606	2	484237	F	II		IGR	opensea	IGR-opensea		NA	NA
cg25042465	-0.156382	0.580631	-8.84057	1.39546e-16	1.06245e-14	26.6055	0.514287	0.670669	0.156382	8	50825702	R	II	SNTG1	5'UTR	shelf	5'UTR-shelf	chr8:50822270-50822860	NA	NA
cg13687795	-0.159074	0.655007	-8.84017	1.39935e-16	1.06496e-14	26.6028	0.587521	0.746595	0.159074	2	79316020	F	II	REG1B	TSS1500	opensea	TSS1500-opensea		NA	NA
cg23888021	-0.170089	0.624429	-8.83895	1.41114e-16	1.07348e-14	26.5945	0.55227	0.722359	0.170089	12	132908418	R	II		IGR	shelf	IGR-shelf	chr12:132910476-132910802	NA	NA			rs76494426
cg19936318	-0.15061	0.632628	-8.83884	1.41227e-16	1.07412e-14	26.5937	0.568733	0.719343	0.15061	1	7028279	F	II	CAMTA1	Body	opensea	Body-opensea		NA	TRUE
cg02262358	-0.174127	0.648944	-8.83788	1.42157e-16	1.08028e-14	26.5872	0.575072	0.7492	0.174127	12	125811065	R	II	TMEM132B	TSS200	opensea	TSS200-opensea		NA	NA			rs550677
cg13797779	-0.158681	0.618207	-8.83312	1.46907e-16	1.11215e-14	26.5547	0.550888	0.709569	0.158681	14	99180409	F	II	C14orf177	5'UTR	opensea	5'UTR-opensea		NA	NA			rs77223689
cg22026150	-0.15527	0.571965	-8.83133	1.48733e-16	1.12432e-14	26.5425	0.506092	0.661363	0.15527	8	50653870	R	II		IGR	opensea	IGR-opensea		NA	NA
cg10948284	-0.164716	0.645171	-8.82881	1.5134e-16	1.14188e-14	26.5253	0.575291	0.740008	0.164716	8	143882645	F	I		IGR	shelf	IGR-shelf	chr8:143879594-143879806	NA	NA
cg10754505	-0.178316	0.593375	-8.82663	1.53633e-16	1.15651e-14	26.5105	0.517726	0.696042	0.178316	20	60303881	F	II	CDH4	Body	opensea	Body-opensea		NA	NA
cg13157793	-0.19175	0.689521	-8.82336	1.57138e-16	1.17969e-14	26.4882	0.608172	0.799922	0.19175	15	24920450	F	I	C15orf2	TSS200	shore	TSS200-shore	chr15:24920613-24921252	NA	NA
cg19165946	-0.162794	0.690993	-8.82268	1.57881e-16	1.18503e-14	26.4835	0.621929	0.784723	0.162794	7	138719443	F	II	ZC3HAV1L	Body	shore	Body-shore	chr7:138720044-138721019	NA	NA		rs35861287
cg26039867	-0.181127	0.509463	-8.82118	1.5952e-16	1.19559e-14	26.4733	0.432621	0.613748	0.181127	7	1303218	F	I		IGR	opensea	IGR-opensea		NA	NA
cg18387839	-0.194126	0.737057	-8.8205	1.60266e-16	1.19993e-14	26.4687	0.6547	0.848826	0.194126	13	112904312	F	I		IGR	opensea	IGR-opensea		NA	NA
cg04169186	-0.166688	0.659779	-8.82007	1.60745e-16	1.20277e-14	26.4657	0.589063	0.755751	0.166688	10	83625257	R	II		IGR	opensea	IGR-opensea		NA	TRUE
cg09363068	-0.156052	0.548089	-8.81951	1.61366e-16	1.20641e-14	26.4619	0.481885	0.637937	0.156052	7	1004748	F	II	COX19	3'UTR	shelf	3'UTR-shelf	chr7:1007159-1007558	TRUE	NA
cg04838249	-0.169866	0.643594	-8.8178	1.63281e-16	1.21946e-14	26.4502	0.57153	0.741396	0.169866	12	34500640	F	I		IGR	island	IGR-island	chr12:34500550-34500814	NA	NA
cg11835897	-0.171412	0.528473	-8.81634	1.64927e-16	1.23049e-14	26.4403	0.455753	0.627165	0.171412	5	2155934	R	II		IGR	opensea	IGR-opensea		NA	NA
cg13946792	-0.171572	0.645562	-8.81228	1.69614e-16	1.26336e-14	26.4126	0.572774	0.744346	0.171572	19	57337648	F	II	PEG3	TSS1500	opensea	TSS1500-opensea		NA	NA		rs10411432
cg09570682	0.160784	0.484084	8.81069	1.71479e-16	1.27567e-14	26.4018	0.552296	0.391511	-0.160784	6	106429443	F	I		IGR	island	IGR-island	chr6:106429111-106429772	NA	NA
cg05603784	-0.154796	0.579131	-8.81037	1.71857e-16	1.27795e-14	26.3996	0.51346	0.668256	0.154796	16	88499083	F	I	ZNF469	Body	shore	Body-shore	chr16:88496201-88497763	NA	NA
cg02245566	-0.174139	0.548403	-8.8086	1.73964e-16	1.29309e-14	26.3876	0.474525	0.648665	0.174139	1	158670617	F	II	OR6K2	TSS200	opensea	TSS200-opensea		NA	NA
cg07708286	-0.165503	0.727535	-8.80729	1.75544e-16	1.30295e-14	26.3786	0.657321	0.822824	0.165503	16	86465815	R	I		IGR	opensea	IGR-opensea		NA	NA
cg01526498	-0.152108	0.602214	-8.80481	1.78559e-16	1.32342e-14	26.3618	0.537684	0.689791	0.152108	14	101416558	F	II		IGR	opensea	IGR-opensea		NA	NA		rs3840822
cg25338036	-0.192909	0.705499	-8.80347	1.80226e-16	1.33359e-14	26.3526	0.623659	0.816568	0.192909	8	3047536	R	I	CSMD1	Body	opensea	Body-opensea		NA	NA
cg04388919	-0.150047	0.510202	-8.80308	1.807e-16	1.33595e-14	26.35	0.446545	0.596593	0.150047	7	149119133	R	I		IGR	shore	IGR-shore	chr7:149119398-149120307	NA	NA
cg24338843	-0.151945	0.608256	-8.80143	1.82769e-16	1.34826e-14	26.3388	0.543794	0.695739	0.151945	1	12806667	R	II	C1orf158	Body	opensea	Body-opensea		NA	NA
cg05682479	-0.184909	0.65522	-8.797	1.88429e-16	1.38462e-14	26.3086	0.576774	0.761682	0.184909	12	128364721	R	II		IGR	opensea	IGR-opensea		NA	NA
cg20137179	-0.178066	0.623084	-8.79296	1.93749e-16	1.41909e-14	26.2811	0.54754	0.725607	0.178066	1	158327383	R	II		IGR	opensea	IGR-opensea		NA	TRUE
cg11500790	-0.16509	0.617719	-8.7911	1.96247e-16	1.43476e-14	26.2684	0.547681	0.712771	0.16509	11	132321481	F	II	OPCML	Body	opensea	Body-opensea		NA	TRUE		rs77997406
cg21805936	-0.19793	0.604022	-8.79003	1.97693e-16	1.44328e-14	26.2612	0.520051	0.717982	0.19793	12	116008178	F	I		IGR	opensea	IGR-opensea		NA	TRUE
cg14478460	-0.171773	0.569141	-8.78603	2.03209e-16	1.47966e-14	26.234	0.496267	0.66804	0.171773	18	76401126	R	II		IGR	shelf	IGR-shelf	chr18:76397483-76398378	NA	NA
cg14050129	-0.188676	0.646633	-8.78578	2.03561e-16	1.48192e-14	26.2323	0.566588	0.755265	0.188676	7	153287591	F	I		IGR	opensea	IGR-opensea		NA	NA
cg10799386	-0.154152	0.552203	-8.78476	2.04996e-16	1.49117e-14	26.2253	0.486805	0.640956	0.154152	10	108332882	R	II		IGR	opensea	IGR-opensea		NA	TRUE
cg07233230	-0.205158	0.628779	-8.78398	2.06091e-16	1.49762e-14	26.2201	0.541742	0.7469	0.205158	1	241912768	F	I	WDR64	Body	opensea	Body-opensea		NA	NA
cg01125141	-0.161177	0.665876	-8.78378	2.06372e-16	1.49876e-14	26.2187	0.597498	0.758675	0.161177	13	112612375	R	I		IGR	shore	IGR-shore	chr13:112610658-112611433	NA	NA
cg19696117	-0.163923	0.603261	-8.78361	2.06615e-16	1.50022e-14	26.2175	0.533718	0.697641	0.163923	12	5602669	R	II	NTF3	Body	shore	Body-shore	chr12:5603587-5603990	NA	NA
cg04492807	-0.168629	0.721184	-8.77941	2.12666e-16	1.54043e-14	26.189	0.649645	0.818273	0.168629	5	2225108	R	II		IGR	opensea	IGR-opensea		NA	NA
cg04890607	-0.200879	0.515949	-8.7781	2.14599e-16	1.55318e-14	26.1801	0.430727	0.631607	0.200879	12	66262214	F	I	HMGA2	Body	opensea	Body-opensea		NA	TRUE
cg17696563	-0.193104	0.770446	-8.77594	2.17811e-16	1.57401e-14	26.1654	0.688523	0.881627	0.193104	2	242756362	R	I	NEU4	Body	island	Body-island	chr2:242755693-242756363	TRUE	NA
cg24128045	-0.169054	0.696288	-8.77414	2.20526e-16	1.59129e-14	26.1531	0.624568	0.793622	0.169054	19	54174606	R	I	MIR1323	TSS1500	opensea	TSS1500-opensea		NA	NA
cg26954695	-0.193819	0.639368	-8.77395	2.20814e-16	1.59273e-14	26.1518	0.557142	0.750961	0.193819	19	59085561	F	I	MZF1	TSS1500	shore	TSS1500-shore	chr19:59086697-59087299	NA	NA
cg16702467	-0.153168	0.720296	-8.77111	2.2516e-16	1.62019e-14	26.1326	0.655315	0.808483	0.153168	16	26227882	F	II		IGR	opensea	IGR-opensea		NA	TRUE
cg10274606	-0.159632	0.55022	-8.76957	2.27562e-16	1.63486e-14	26.1221	0.482498	0.64213	0.159632	14	73118334	R	II		IGR	opensea	IGR-opensea		NA	TRUE
cg10609868	-0.162794	0.565043	-8.76727	2.31177e-16	1.65686e-14	26.1065	0.495979	0.658772	0.162794	8	81963379	R	II	PAG1	5'UTR	opensea	5'UTR-opensea		TRUE	TRUE
cg21057643	-0.161625	0.657927	-8.76529	2.34345e-16	1.67891e-14	26.093	0.589359	0.750984	0.161625	5	6411758	F	II		IGR	opensea	IGR-opensea		NA	NA
cg25002129	-0.157201	0.634998	-8.76473	2.35254e-16	1.68375e-14	26.0892	0.568307	0.725508	0.157201	11	131965815	F	II	NTM	Body	opensea	Body-opensea		NA	TRUE
cg10730165	-0.182762	0.621314	-8.7645	2.35634e-16	1.6858e-14	26.0876	0.543779	0.726541	0.182762	7	142364023	F	II		IGR	opensea	IGR-opensea		NA	NA
cg06841902	-0.156845	0.568707	-8.76421	2.36104e-16	1.68848e-14	26.0857	0.502166	0.659011	0.156845	17	3183524	F	II	OR3A2	TSS1500	opensea	TSS1500-opensea		NA	NA		rs74844701
cg10982683	-0.166216	0.696766	-8.7638	2.36765e-16	1.69288e-14	26.0829	0.62625	0.792467	0.166216	8	1238566	F	II		IGR	opensea	IGR-opensea		NA	NA
cg12493906	-0.157186	0.563382	-8.76256	2.38791e-16	1.70534e-14	26.0745	0.496697	0.653883	0.157186	11	5009311	F	II	MMP26	TSS200	opensea	TSS200-opensea		NA	NA
cg17601191	-0.153751	0.457682	-8.76141	2.40676e-16	1.71744e-14	26.0667	0.392454	0.546206	0.153751	13	31264764	R	I		IGR	opensea	IGR-opensea		TRUE	TRUE
cg18232313	-0.156383	0.592179	-8.7612	2.41021e-16	1.71956e-14	26.0653	0.525835	0.682218	0.156383	6	18123232	F	I	NHLRC1	TSS1500	shore	TSS1500-shore	chr6:18122250-18122994	TRUE	TRUE			rs77117317
cg11118697	-0.161631	0.616653	-8.76095	2.4144e-16	1.72221e-14	26.0636	0.548082	0.709713	0.161631	13	112856684	R	II		IGR	opensea	IGR-opensea		NA	NA
cg13547712	-0.200939	0.776332	-8.7602	2.42689e-16	1.72975e-14	26.0585	0.691085	0.892024	0.200939	1	2850512	F	I		IGR	shore	IGR-shore	chr1:2850665-2850873	NA	NA
cg14629571	-0.156802	0.61531	-8.75902	2.44663e-16	1.74175e-14	26.0505	0.548788	0.70559	0.156802	9	120470582	F	II	TLR4	Body	opensea	Body-opensea		NA	NA
cg15703970	-0.196579	0.635758	-8.75757	2.47109e-16	1.75833e-14	26.0406	0.552361	0.74894	0.196579	7	1787310	R	I	ELFN1	3'UTR	shore	3'UTR-shore	chr7:1784027-1786934	NA	NA
cg09038183	-0.166804	0.558494	-8.75756	2.47139e-16	1.75833e-14	26.0405	0.487728	0.654533	0.166804	5	1771469	R	II		IGR	shore	IGR-shore	chr5:1769314-1769695	NA	TRUE
cg04553632	-0.157358	0.522524	-8.75616	2.49517e-16	1.77351e-14	26.031	0.455766	0.613124	0.157358	10	134929181	F	I	GPR123	Body	shelf	Body-shelf	chr10:134925815-134926878	NA	NA		rs34673224
cg08133486	0.157566	0.54567	8.75393	2.53375e-16	1.79845e-14	26.0159	0.612516	0.45495	-0.157566	6	100911746	F	II	SIM1	TSS200	shore	TSS200-shore	chr6:100912071-100913337	TRUE	TRUE
cg26120093	-0.1833	0.698845	-8.75103	2.58465e-16	1.82953e-14	25.9962	0.621082	0.804381	0.1833	14	104600550	F	I		IGR	shore	IGR-shore	chr14:104601959-104605672	NA	NA
cg06719334	-0.174975	0.527869	-8.74628	2.67037e-16	1.8865e-14	25.964	0.453637	0.628612	0.174975	16	7501308	F	II	A2BP1	Body	opensea	Body-opensea		NA	TRUE
cg06010711	-0.178871	0.669914	-8.7444	2.70498e-16	1.90721e-14	25.9512	0.594029	0.7729	0.178871	2	80453645	R	II	CTNNA2	Body	opensea	Body-opensea		NA	NA
cg10815253	-0.150841	0.583717	-8.74416	2.70947e-16	1.90963e-14	25.9496	0.519723	0.670565	0.150841	2	116925524	F	II		IGR	opensea	IGR-opensea		NA	TRUE		rs72832686
cg12072262	-0.22626	0.645256	-8.7436	2.71995e-16	1.91664e-14	25.9458	0.549267	0.775526	0.22626	10	129379353	F	I		IGR	opensea	IGR-opensea		NA	NA
cg17489871	-0.151798	0.637401	-8.74238	2.74271e-16	1.93063e-14	25.9375	0.573001	0.7248	0.151798	2	439337	F	II		IGR	opensea	IGR-opensea		NA	NA
cg14971327	-0.174321	0.677133	-8.7412	2.76506e-16	1.9435e-14	25.9295	0.603178	0.777499	0.174321	5	4230502	R	II		IGR	opensea	IGR-opensea		NA	NA
cg04158612	-0.161758	0.573975	-8.74031	2.78192e-16	1.9527e-14	25.9235	0.50535	0.667108	0.161758	16	1157349	F	I		IGR	shelf	IGR-shelf	chr16:1152947-1153355	NA	NA
cg01765416	-0.15301	0.556829	-8.73772	2.83177e-16	1.98506e-14	25.906	0.491916	0.644926	0.15301	12	132965965	F	II		IGR	island	IGR-island	chr12:132965817-132966082	NA	NA		rs76188687	rs80011946
cg13461336	-0.1554	0.637478	-8.73772	2.83191e-16	1.98506e-14	25.9059	0.571551	0.72695	0.1554	11	133711254	F	II	SPATA19	3'UTR	opensea	3'UTR-opensea		NA	NA
cg08735211	0.156405	0.429362	8.73758	2.83462e-16	1.98657e-14	25.905	0.495716	0.339311	-0.156405	6	32920657	R	II	HLA-DMA	Body	opensea	Body-opensea		NA	TRUE
cg07126216	-0.152605	0.563654	-8.73753	2.83546e-16	1.98678e-14	25.9047	0.498913	0.651518	0.152605	12	108426797	F	II		IGR	opensea	IGR-opensea		NA	TRUE
cg15766408	-0.170001	0.652315	-8.73725	2.84109e-16	1.98987e-14	25.9027	0.580193	0.750194	0.170001	4	16850240	R	II	LDB2	Body	opensea	Body-opensea		NA	TRUE
cg00007326	-0.16697	0.672377	-8.73431	2.89882e-16	2.02527e-14	25.8828	0.601541	0.768511	0.16697	19	13366046	R	II	CACNA1A	Body	island	Body-island	chr19:13365922-13366158	NA	NA			rs76015014
cg03018162	-0.167242	0.645736	-8.73178	2.94962e-16	2.05757e-14	25.8657	0.574785	0.742027	0.167242	8	137807457	F	II		IGR	opensea	IGR-opensea		NA	NA
cg23541676	-0.181399	0.701081	-8.73101	2.96527e-16	2.06729e-14	25.8604	0.624124	0.805523	0.181399	13	113088886	F	II	C13orf28	3'UTR	opensea	3'UTR-opensea		NA	NA		rs79622252
cg07471018	-0.197083	0.555073	-8.72987	2.98844e-16	2.08183e-14	25.8527	0.471462	0.668545	0.197083	4	46911550	R	I	COX7B2	TSS1500	opensea	TSS1500-opensea		NA	NA
cg05583676	-0.23447	0.703403	-8.72802	3.02661e-16	2.10598e-14	25.8402	0.603931	0.838401	0.23447	10	132461246	R	I		IGR	opensea	IGR-opensea		NA	NA
cg10622019	-0.176772	0.681513	-8.72654	3.05754e-16	2.12422e-14	25.8301	0.606519	0.783291	0.176772	1	4221485	R	I		IGR	island	IGR-island	chr1:4221387-4221672	NA	NA
cg06264868	-0.191101	0.709189	-8.72499	3.0902e-16	2.14485e-14	25.8196	0.628115	0.819216	0.191101	10	778709	R	II		IGR	opensea	IGR-opensea		NA	NA
cg01755009	-0.166796	0.626747	-8.72492	3.09163e-16	2.14543e-14	25.8192	0.555985	0.722781	0.166796	1	247978690	F	II	OR14A16	1stExon	opensea	1stExon-opensea		NA	NA
cg13224139	-0.176554	0.676144	-8.72487	3.09273e-16	2.14577e-14	25.8188	0.601243	0.777797	0.176554	13	112901929	F	II		IGR	opensea	IGR-opensea		NA	NA
cg23737927	-0.187388	0.536508	-8.72056	3.18537e-16	2.20538e-14	25.7896	0.45701	0.644398	0.187388	12	5149153	F	I		IGR	shelf	IGR-shelf	chr12:5153012-5154346	NA	NA		rs7961013
cg01857186	-0.165157	0.609379	-8.71929	3.21328e-16	2.22385e-14	25.781	0.539313	0.704469	0.165157	11	123811110	R	II	OR4D5	1stExon	opensea	1stExon-opensea		NA	NA
cg06474225	-0.19019	0.448491	-8.71171	3.38462e-16	2.32991e-14	25.7297	0.367804	0.557994	0.19019	10	124228770	R	I	HTRA1	Body	opensea	Body-opensea		TRUE	TRUE
cg01424839	-0.177495	0.678167	-8.70988	3.42713e-16	2.35647e-14	25.7173	0.602866	0.780361	0.177495	19	31213171	R	II		IGR	shelf	IGR-shelf	chr19:31210517-31210884	NA	NA
cg18034742	-0.156065	0.691375	-8.70866	3.45594e-16	2.37402e-14	25.7091	0.625166	0.781231	0.156065	12	128796292	F	II	TMEM132C	Body	opensea	Body-opensea		NA	NA		rs34722372
cg14349667	0.156542	0.483078	8.70539	3.53409e-16	2.42216e-14	25.687	0.54949	0.392948	-0.156542	4	81189706	R	I	FGF5	Body	shore	Body-shore	chr4:81187494-81187913	NA	NA
cg18998003	-0.15782	0.600418	-8.70287	3.59561e-16	2.46105e-14	25.6699	0.533464	0.691284	0.15782	20	60388715	R	II	CDH4	Body	opensea	Body-opensea		NA	NA		rs6061840
cg07395806	-0.157991	0.708076	-8.70208	3.61516e-16	2.47349e-14	25.6646	0.641049	0.79904	0.157991	1	248684628	F	II	OR2G6	TSS1500	opensea	TSS1500-opensea		NA	NA
cg06186245	-0.163372	0.543255	-8.6951	3.7922e-16	2.5853e-14	25.6173	0.473945	0.637317	0.163372	3	100245062	R	II	TMEM45A	5'UTR	opensea	5'UTR-opensea		TRUE	TRUE
cg05239940	-0.151646	0.544726	-8.69476	3.8009e-16	2.58992e-14	25.615	0.480391	0.632038	0.151646	10	130935434	R	II		IGR	opensea	IGR-opensea		NA	NA
cg08662619	-0.168057	0.686316	-8.69291	3.84923e-16	2.61873e-14	25.6026	0.615019	0.783077	0.168057	6	150070041	F	II	PCMT1	TSS1500	shore	TSS1500-shore	chr6:150070513-150071285	NA	NA		rs75535670
cg03664459	-0.153681	0.574892	-8.69269	3.85519e-16	2.6218e-14	25.601	0.509694	0.663375	0.153681	2	906167	F	II	C2orf90	TSS200	opensea	TSS200-opensea		NA	NA		rs79081217
cg25699759	-0.184076	0.710895	-8.69182	3.87826e-16	2.635e-14	25.5951	0.632802	0.816878	0.184076	15	88576311	R	I	NTRK3	Body	opensea	Body-opensea		NA	NA
cg19666687	-0.150665	0.605956	-8.68848	3.96763e-16	2.68863e-14	25.5726	0.542037	0.692702	0.150665	14	98154028	F	II		IGR	opensea	IGR-opensea		NA	NA
cg22673542	-0.150588	0.584746	-8.68666	4.01745e-16	2.72085e-14	25.5603	0.52086	0.671449	0.150588	1	248758128	F	II	OR2T10	TSS1500	opensea	TSS1500-opensea		NA	NA
cg13608273	-0.198223	0.614096	-8.6826	4.13064e-16	2.79018e-14	25.5328	0.530002	0.728225	0.198223	5	3225922	R	II		IGR	opensea	IGR-opensea		NA	NA
cg20908131	-0.190076	0.653397	-8.68182	4.15252e-16	2.80338e-14	25.5276	0.572759	0.762834	0.190076	14	98419775	R	II	C14orf64	Body	opensea	Body-opensea		NA	NA
cg03331715	-0.179006	0.671829	-8.68013	4.20083e-16	2.83228e-14	25.5162	0.595887	0.774892	0.179006	12	104689087	R	II	TXNRD1	5'UTR	opensea	5'UTR-opensea		NA	NA
cg02638348	-0.172595	0.571168	-8.678	4.26242e-16	2.86946e-14	25.5018	0.497945	0.670541	0.172595	10	134692167	R	I		IGR	shore	IGR-shore	chr10:134692851-134693252	NA	TRUE
cg07156249	0.176737	0.488903	8.67784	4.26706e-16	2.87157e-14	25.5007	0.563883	0.387146	-0.176737	6	32822911	F	II	PSMB9	Body	shore	Body-shore	chr6:32820849-32822370	NA	NA
cg12554476	-0.173771	0.642355	-8.67763	4.27335e-16	2.87526e-14	25.4992	0.568634	0.742405	0.173771	16	20338808	R	II	GP2	5'UTR	opensea	5'UTR-opensea		NA	NA
cg24366429	-0.175605	0.570637	-8.67565	4.33166e-16	2.9096e-14	25.4859	0.496139	0.671743	0.175605	17	77207424	F	I	HRNBP3	5'UTR	opensea	5'UTR-opensea		NA	NA
cg15122358	-0.158446	0.73391	-8.66945	4.51907e-16	3.02085e-14	25.444	0.666691	0.825137	0.158446	10	134806511	F	I		IGR	shore	IGR-shore	chr10:134807176-134807445	NA	NA
cg20556988	-0.157318	0.58661	-8.66938	4.52106e-16	3.02162e-14	25.4436	0.519869	0.677187	0.157318	17	32690127	F	II	CCL1	1stExon	opensea	1stExon-opensea		NA	NA
cg23254163	-0.167564	0.611355	-8.66582	4.63254e-16	3.08698e-14	25.4195	0.540267	0.707831	0.167564	1	152506842	R	II		IGR	opensea	IGR-opensea		NA	NA
cg11755803	-0.171277	0.649284	-8.66492	4.6611e-16	3.10428e-14	25.4134	0.576621	0.747898	0.171277	12	129000542	F	II	TMEM132C	Body	opensea	Body-opensea		NA	NA			rs75106667
cg27460526	-0.157967	0.66669	-8.66464	4.66989e-16	3.10899e-14	25.4116	0.599674	0.757641	0.157967	20	54572753	R	II	CBLN4	3'UTR	opensea	3'UTR-opensea		NA	NA			rs80149532
cg07164136	-0.154336	0.594713	-8.6642	4.68399e-16	3.11723e-14	25.4086	0.529237	0.683572	0.154336	10	108393920	F	II	SORCS1	Body	opensea	Body-opensea		NA	NA
cg01140660	-0.197988	0.758737	-8.66313	4.71834e-16	3.13777e-14	25.4014	0.674742	0.87273	0.197988	11	133233200	R	I	OPCML	Body	shore	Body-shore	chr11:133230884-133231645	NA	NA			rs75969401
cg06948658	-0.171742	0.579426	-8.66291	4.72544e-16	3.14133e-14	25.3999	0.506566	0.678308	0.171742	12	2552733	F	II	CACNA1C	Body	opensea	Body-opensea		NA	TRUE
cg19787906	-0.153655	0.630246	-8.66084	4.79276e-16	3.17905e-14	25.3859	0.565059	0.718714	0.153655	20	57765943	R	II	ZNF831	TSS200	shore	TSS200-shore	chr20:57766396-57767896	NA	NA
cg18366169	-0.156999	0.472928	-8.65982	4.82608e-16	3.19939e-14	25.379	0.406323	0.563322	0.156999	5	1948875	R	II		IGR	shore	IGR-shore	chr5:1948994-1949227	NA	NA
cg15159131	-0.152512	0.700505	-8.65768	4.89709e-16	3.23991e-14	25.3646	0.635803	0.788315	0.152512	11	132107699	F	II	NTM	Body	opensea	Body-opensea		NA	NA		rs79116776
cg23413527	-0.153601	0.636057	-8.65229	5.08066e-16	3.35151e-14	25.3282	0.570893	0.724494	0.153601	15	95145293	R	II		IGR	opensea	IGR-opensea		NA	TRUE
cg16003049	-0.155889	0.710945	-8.65168	5.10198e-16	3.36459e-14	25.3241	0.64481	0.800699	0.155889	11	2190134	R	II	TH	Body	shore	Body-shore	chr11:2187488-2188245	TRUE	NA
cg24672116	-0.15758	0.65155	-8.64718	5.26089e-16	3.46217e-14	25.2938	0.584698	0.742279	0.15758	10	130124853	F	II		IGR	opensea	IGR-opensea		NA	NA
cg23170495	-0.159347	0.596517	-8.64661	5.28157e-16	3.47451e-14	25.2899	0.528916	0.688263	0.159347	10	130519824	F	II		IGR	opensea	IGR-opensea		NA	NA
cg14602220	-0.223367	0.636574	-8.64614	5.29852e-16	3.48502e-14	25.2868	0.541812	0.765179	0.223367	17	77174120	F	I	HRNBP3	5'UTR	opensea	5'UTR-opensea		NA	NA
cg12469902	-0.168115	0.542856	-8.64333	5.401e-16	3.54596e-14	25.2678	0.471534	0.639649	0.168115	5	4230546	R	II		IGR	opensea	IGR-opensea		NA	NA
cg24440526	-0.155809	0.688706	-8.64071	5.49822e-16	3.60454e-14	25.2502	0.622605	0.778414	0.155809	1	158517489	F	II	OR6Y1	1stExon	opensea	1stExon-opensea		NA	NA			rs41273493
cg23161733	-0.178376	0.678945	-8.63944	5.54614e-16	3.63265e-14	25.2416	0.603271	0.781647	0.178376	10	108385382	F	I	SORCS1	Body	opensea	Body-opensea		NA	TRUE
cg03725652	-0.15898	0.560316	-8.63842	5.58472e-16	3.65659e-14	25.2348	0.49287	0.65185	0.15898	18	76073399	R	I		IGR	island	IGR-island	chr18:76073274-76073558	NA	NA
cg16456576	-0.154469	0.632942	-8.63777	5.60951e-16	3.66949e-14	25.2304	0.56741	0.721878	0.154469	16	86409251	R	II		IGR	shore	IGR-shore	chr16:86411154-86411457	TRUE	NA
cg02065293	-0.151055	0.577949	-8.63468	5.72908e-16	3.74024e-14	25.2095	0.513865	0.66492	0.151055	2	1928480	R	II	MYT1L	Body	opensea	Body-opensea		NA	NA
cg01263631	-0.196786	0.592871	-8.63338	5.78006e-16	3.77011e-14	25.2008	0.509386	0.706172	0.196786	16	88485471	R	I		IGR	opensea	IGR-opensea		NA	NA
cg14195925	-0.187284	0.587572	-8.63216	5.82842e-16	3.7989e-14	25.1926	0.508118	0.695402	0.187284	17	77224403	F	I	HRNBP3	5'UTR	opensea	5'UTR-opensea		NA	NA
cg14128018	-0.161913	0.611935	-8.63147	5.85564e-16	3.81595e-14	25.188	0.543245	0.705158	0.161913	5	4399620	R	II		IGR	opensea	IGR-opensea		NA	TRUE
cg26247186	-0.15853	0.60342	-8.63128	5.86324e-16	3.82022e-14	25.1867	0.536164	0.694694	0.15853	12	129099425	F	II	TMEM132C	Body	opensea	Body-opensea		NA	NA
cg04706044	-0.160157	0.664486	-8.63079	5.88282e-16	3.83159e-14	25.1834	0.59654	0.756697	0.160157	12	127208176	F	II		IGR	shelf	IGR-shelf	chr12:127210778-127211651	NA	NA
cg22597267	-0.160766	0.665472	-8.62796	5.99753e-16	3.89997e-14	25.1643	0.597268	0.758035	0.160766	2	80904864	F	II		IGR	opensea	IGR-opensea		NA	TRUE
cg06824394	0.176391	0.373343	8.62651	6.05717e-16	3.9352e-14	25.1545	0.448175	0.271784	-0.176391	7	86846535	F	II	C7orf23	Body	shelf	Body-shelf	chr7:86848911-86850024	NA	NA
cg24484802	-0.185202	0.634511	-8.62637	6.06307e-16	3.93634e-14	25.1536	0.555941	0.741143	0.185202	12	5937031	F	I	ANO2	Body	island	Body-island	chr12:5936876-5937085	NA	TRUE
cg11476737	-0.180947	0.649038	-8.62517	6.11285e-16	3.96351e-14	25.1455	0.572273	0.75322	0.180947	10	2815189	F	I		IGR	island	IGR-island	chr10:2815003-2815469	NA	NA
cg06432426	-0.160267	0.653796	-8.6247	6.13207e-16	3.97455e-14	25.1424	0.585804	0.746072	0.160267	2	484825	R	II		IGR	opensea	IGR-opensea		NA	NA
cg04181013	-0.151919	0.766769	-8.62467	6.13354e-16	3.97478e-14	25.1421	0.702319	0.854237	0.151919	2	92032397	R	I		IGR	shore	IGR-shore	chr2:92031757-92032003	NA	NA
cg06885179	-0.152739	0.445189	-8.62419	6.15374e-16	3.98573e-14	25.1389	0.38039	0.53313	0.152739	5	8842744	R	II		IGR	opensea	IGR-opensea		NA	NA
cg26547526	-0.197402	0.611883	-8.624	6.16156e-16	3.98936e-14	25.1376	0.528137	0.725539	0.197402	10	2666743	F	I		IGR	opensea	IGR-opensea		NA	NA
cg06581491	-0.164344	0.703482	-8.61865	6.39033e-16	4.12414e-14	25.1016	0.63376	0.798104	0.164344	10	134730516	F	II		IGR	shore	IGR-shore	chr10:134731433-134732013	NA	NA		rs10870204
cg11471772	0.159954	0.445726	8.61771	6.43126e-16	4.14685e-14	25.0953	0.513585	0.353631	-0.159954	6	100911687	F	I	SIM1	TSS200	shore	TSS200-shore	chr6:100912071-100913337	TRUE	TRUE		rs80193484
cg06158111	-0.158468	0.524443	-8.61512	6.54568e-16	4.21309e-14	25.0779	0.457214	0.615682	0.158468	16	891302	R	I		IGR	shelf	IGR-shelf	chr16:894644-895057	NA	NA
cg12163365	-0.176913	0.624564	-8.61506	6.54841e-16	4.21334e-14	25.0775	0.54951	0.726422	0.176913	8	140465582	F	II		IGR	opensea	IGR-opensea		NA	TRUE
cg18707501	-0.185934	0.635322	-8.61407	6.59285e-16	4.23966e-14	25.0708	0.556441	0.742375	0.185934	15	26860777	F	I	GABRB3	Body	opensea	Body-opensea		NA	TRUE
cg23201695	-0.155789	0.668934	-8.60752	6.89316e-16	4.41546e-14	25.0268	0.602842	0.75863	0.155789	8	1272959	F	II		IGR	opensea	IGR-opensea		NA	NA
cg18532131	-0.162522	0.55798	-8.60719	6.90889e-16	4.42396e-14	25.0245	0.489031	0.651553	0.162522	5	3128258	R	II		IGR	opensea	IGR-opensea		NA	NA
cg16653620	0.150861	0.478059	8.60466	7.02895e-16	4.49204e-14	25.0075	0.54206	0.391199	-0.150861	2	162284135	R	II		IGR	island	IGR-island	chr2:162283581-162284677	TRUE	NA
cg20751398	-0.16425	0.615422	-8.6013	7.19109e-16	4.58674e-14	24.985	0.54574	0.70999	0.16425	11	126660703	R	II	KIRREL3	Body	opensea	Body-opensea		NA	TRUE
cg20811564	-0.152231	0.617955	-8.60085	7.21314e-16	4.59634e-14	24.9819	0.553372	0.705603	0.152231	17	11556567	F	II	DNAH9	Body	opensea	Body-opensea		NA	NA		rs78767963
cg08154219	-0.154044	0.777887	-8.60024	7.24351e-16	4.61445e-14	24.9778	0.712535	0.866579	0.154044	15	25416772	R	I	SNORD115-2	TSS1500	opensea	TSS1500-opensea		NA	NA
cg12830271	-0.152113	0.625979	-8.59774	7.36765e-16	4.68361e-14	24.961	0.561447	0.71356	0.152113	5	2007691	F	II		IGR	island	IGR-island	chr5:2007315-2007879	NA	NA
cg23770524	-0.158381	0.739044	-8.59162	7.6808e-16	4.86552e-14	24.9199	0.671852	0.830233	0.158381	13	112602774	F	II		IGR	opensea	IGR-opensea		NA	NA
cg13455634	-0.206283	0.74473	-8.5915	7.68674e-16	4.86757e-14	24.9191	0.657216	0.863499	0.206283	1	213823255	F	I		IGR	opensea	IGR-opensea		NA	TRUE
cg07201003	-0.158114	0.703201	-8.58941	7.79695e-16	4.92784e-14	24.905	0.636122	0.794236	0.158114	18	76311782	F	II		IGR	shelf	IGR-shelf	chr18:76308229-76308578	NA	NA
cg07159802	-0.160992	0.582655	-8.58545	8.00943e-16	5.0471e-14	24.8785	0.514355	0.675347	0.160992	1	247921568	F	II	OR1C1	1stExon	opensea	1stExon-opensea		NA	NA
cg22550446	-0.157406	0.506252	-8.58293	8.14816e-16	5.12644e-14	24.8615	0.439473	0.59688	0.157406	5	8059446	F	II		IGR	opensea	IGR-opensea		NA	TRUE
cg15115960	-0.167477	0.581815	-8.58286	8.1516e-16	5.12771e-14	24.8611	0.510764	0.678242	0.167477	10	130298983	R	II		IGR	island	IGR-island	chr10:130298859-130299159	NA	NA
cg09961427	-0.161856	0.6425	-8.58207	8.19587e-16	5.15017e-14	24.8557	0.573834	0.73569	0.161856	2	127457493	F	II		IGR	opensea	IGR-opensea		NA	TRUE
cg18627496	-0.15896	0.568981	-8.58095	8.2581e-16	5.18476e-14	24.8483	0.501543	0.660503	0.15896	20	60349210	R	II	CDH4	Body	shore	Body-shore	chr20:60348098-60348428	NA	NA
cg07089161	-0.152294	0.567077	-8.57919	8.35737e-16	5.24069e-14	24.8365	0.502467	0.654761	0.152294	7	153287529	R	I		IGR	opensea	IGR-opensea		NA	NA
cg06194010	-0.160408	0.680048	-8.57907	8.36425e-16	5.24318e-14	24.8356	0.611996	0.772404	0.160408	12	2493567	R	II	CACNA1C	Body	opensea	Body-opensea		NA	TRUE
cg06041852	-0.173691	0.608563	-8.57835	8.40552e-16	5.26814e-14	24.8308	0.534876	0.708567	0.173691	10	134734134	F	I		IGR	shore	IGR-shore	chr10:134735972-134736254	NA	NA
cg06276653	-0.154779	0.651756	-8.57742	8.4589e-16	5.29883e-14	24.8245	0.586093	0.740872	0.154779	8	139164635	F	II	FAM135B	Body	opensea	Body-opensea		NA	NA
cg13641012	-0.154315	0.732161	-8.5772	8.47139e-16	5.30573e-14	24.8231	0.666694	0.821009	0.154315	5	491859	F	I	SLC9A3	Body	island	Body-island	chr5:491320-492158	NA	NA		rs6870920
cg25015813	-0.15412	0.577598	-8.57509	8.59352e-16	5.37475e-14	24.8089	0.512213	0.666333	0.15412	12	127226110	F	II		IGR	opensea	IGR-opensea		NA	NA
cg02216247	-0.190211	0.672645	-8.57373	8.67351e-16	5.41538e-14	24.7998	0.591949	0.78216	0.190211	20	61342017	R	II	NTSR1	Body	shore	Body-shore	chr20:61339858-61341220	NA	NA
cg06996956	-0.188313	0.636239	-8.57006	8.8923e-16	5.53282e-14	24.7752	0.556348	0.744662	0.188313	10	50264253	R	I	C10orf72	Body	opensea	Body-opensea		NA	TRUE
cg08264481	-0.168688	0.561883	-8.56722	9.06518e-16	5.63067e-14	24.7561	0.490319	0.659006	0.168688	5	38317102	F	II	EGFLAM	Body	opensea	Body-opensea		NA	NA
cg03890505	-0.172506	0.612202	-8.56599	9.1412e-16	5.67398e-14	24.7479	0.539017	0.711524	0.172506	12	127221782	R	II		IGR	opensea	IGR-opensea		NA	NA
cg13989810	-0.153258	0.737342	-8.5647	9.22179e-16	5.71613e-14	24.7392	0.672323	0.825581	0.153258	7	154179786	F	II	DPP6	Body	opensea	Body-opensea		NA	NA
cg12228461	-0.153014	0.643287	-8.56355	9.29369e-16	5.75476e-14	24.7315	0.578372	0.731386	0.153014	6	33143721	R	II	COL11A2	Body	opensea	Body-opensea		NA	NA
cg19852204	-0.154369	0.638311	-8.56335	9.30667e-16	5.76142e-14	24.7302	0.572821	0.72719	0.154369	5	3932233	F	II		IGR	opensea	IGR-opensea		NA	NA
cg17491560	-0.163785	0.618532	-8.56252	9.35885e-16	5.78914e-14	24.7246	0.549047	0.712833	0.163785	5	6338529	F	II	FLJ33360	TSS1500	opensea	TSS1500-opensea		NA	NA
cg20388732	0.152842	0.506225	8.56205	9.38874e-16	5.80327e-14	24.7215	0.571067	0.418225	-0.152842	17	40439433	R	II	STAT5A	TSS200	shore	TSS200-shore	chr17:40440188-40441014	NA	TRUE
cg22911315	-0.16593	0.738575	-8.56049	9.4891e-16	5.85364e-14	24.711	0.66818	0.83411	0.16593	8	3245076	F	II	CSMD1	Body	opensea	Body-opensea		NA	NA
cg17588713	-0.170987	0.532184	-8.55942	9.55841e-16	5.88992e-14	24.7038	0.459644	0.630631	0.170987	20	60477817	R	II	CDH4	Body	opensea	Body-opensea		NA	NA
cg06434470	-0.156436	0.701726	-8.5594	9.55934e-16	5.88992e-14	24.7037	0.63536	0.791795	0.156436	7	154429544	R	II	DPP6	Body	opensea	Body-opensea		NA	NA
cg24086536	-0.155735	0.646952	-8.55702	9.71531e-16	5.97682e-14	24.6877	0.580883	0.736618	0.155735	19	56444551	F	II	NLRP13	TSS1500	opensea	TSS1500-opensea		NA	NA		rs382113
cg19653212	0.202763	0.462439	8.55261	1.00098e-15	6.14229e-14	24.6582	0.548459	0.345696	-0.202763	6	42145954	R	I	GUCA1A	Body	island	Body-island	chr6:42145847-42146053	NA	NA
cg24102792	-0.175289	0.616746	-8.55039	1.01615e-15	6.22793e-14	24.6433	0.542381	0.71767	0.175289	13	112051238	R	II		IGR	shelf	IGR-shelf	chr13:112054425-112054644	NA	NA
cg15125053	-0.170106	0.558781	-8.54824	1.03108e-15	6.31195e-14	24.6289	0.486614	0.656721	0.170106	8	144213175	F	II		IGR	opensea	IGR-opensea		NA	NA
cg25174601	-0.16931	0.740919	-8.54652	1.04317e-15	6.37941e-14	24.6174	0.669091	0.838401	0.16931	22	49847690	F	I		IGR	shelf	IGR-shelf	chr22:49843525-49843755	NA	NA		rs714006	rs34965630
cg05006473	-0.234911	0.724676	-8.54355	1.06443e-15	6.49514e-14	24.5975	0.625017	0.859928	0.234911	4	1504481	F	I		IGR	shore	IGR-shore	chr4:1505254-1505560	NA	NA
cg07160783	-0.16041	0.611246	-8.54243	1.07254e-15	6.5369e-14	24.59	0.543193	0.703603	0.16041	16	64861411	R	II		IGR	opensea	IGR-opensea		NA	TRUE
cg12984036	-0.150818	0.525964	-8.5419	1.07639e-15	6.55591e-14	24.5865	0.46198	0.612798	0.150818	19	30940221	F	I	ZNF536	Body	shore	Body-shore	chr19:30941853-30942181	NA	TRUE			rs74985775
cg10168086	-0.150217	0.380164	-8.54023	1.08867e-15	6.62177e-14	24.5752	0.316436	0.466652	0.150217	16	26499966	R	I		IGR	opensea	IGR-opensea		NA	TRUE
cg03465028	0.204009	0.408153	8.53746	1.10924e-15	6.73666e-14	24.5567	0.494703	0.290694	-0.204009	15	31658323	F	II	KLF13	Body	opensea	Body-opensea		TRUE	TRUE
cg09892104	-0.175302	0.63368	-8.53697	1.11298e-15	6.75706e-14	24.5534	0.559309	0.734611	0.175302	10	2815318	R	I		IGR	island	IGR-island	chr10:2815003-2815469	NA	NA
cg24631102	-0.18379	0.538933	-8.53298	1.14344e-15	6.92681e-14	24.5268	0.460961	0.644752	0.18379	10	129349644	R	I	NPS	Body	opensea	Body-opensea		NA	NA
cg08884950	-0.151765	0.635258	-8.53227	1.14893e-15	6.95541e-14	24.522	0.570873	0.722638	0.151765	2	21676340	F	II		IGR	opensea	IGR-opensea		NA	TRUE
cg19628469	-0.159405	0.7237	-8.53201	1.15099e-15	6.96438e-14	24.5203	0.656073	0.815479	0.159405	19	856107	R	I	ELANE	Body	island	Body-island	chr19:855526-856146	NA	NA
cg00737970	-0.150302	0.69303	-8.53148	1.15513e-15	6.98707e-14	24.5167	0.629266	0.779568	0.150302	10	2267289	R	II		IGR	opensea	IGR-opensea		NA	NA
cg13345683	-0.187084	0.740507	-8.52721	1.18897e-15	7.17013e-14	24.4882	0.661138	0.848222	0.187084	7	154003305	R	I	DPP6	Body	shore	Body-shore	chr7:154001964-154002281	NA	NA
cg19268708	-0.171996	0.670767	-8.52656	1.19429e-15	7.1962e-14	24.4838	0.597799	0.769795	0.171996	1	2837518	F	I		IGR	opensea	IGR-opensea		NA	NA
cg01518889	0.197274	0.513609	8.52324	1.2214e-15	7.34483e-14	24.4616	0.597301	0.400027	-0.197274	3	128202493	R	I	GATA2	Body	shelf	Body-shelf	chr3:128205495-128212274	NA	NA			rs55665236
cg26311804	-0.168351	0.624023	-8.52178	1.23353e-15	7.40787e-14	24.4518	0.552601	0.720952	0.168351	11	133155303	F	I	OPCML	Body	opensea	Body-opensea		NA	TRUE
cg13568956	-0.152442	0.500408	-8.52147	1.23616e-15	7.42241e-14	24.4497	0.435736	0.588178	0.152442	8	137938192	R	II		IGR	opensea	IGR-opensea		NA	TRUE
cg16397032	-0.156211	0.628097	-8.52096	1.24043e-15	7.44558e-14	24.4463	0.561826	0.718037	0.156211	12	114204091	F	I		IGR	opensea	IGR-opensea		TRUE	NA
cg13971025	-0.157152	0.72028	-8.5201	1.24768e-15	7.48408e-14	24.4406	0.653609	0.810761	0.157152	9	137996270	R	I	OLFM1	Body	shore	Body-shore	chr9:137997370-137997588	NA	NA
cg24630778	-0.155862	0.74931	-8.51928	1.25455e-15	7.52032e-14	24.4351	0.683187	0.839049	0.155862	12	132687659	R	I	GALNT9	Body	shore	Body-shore	chr12:132688108-132688391	NA	NA
cg09149672	-0.189459	0.610023	-8.51736	1.27101e-15	7.60633e-14	24.4223	0.529647	0.719106	0.189459	1	158261151	F	II	CD1C	Body	opensea	Body-opensea		NA	NA
cg15142042	-0.187953	0.520581	-8.51684	1.27549e-15	7.62933e-14	24.4188	0.440843	0.628796	0.187953	5	3963277	R	II		IGR	shore	IGR-shore	chr5:3962286-3962512	NA	NA
cg15412682	-0.161473	0.701628	-8.51607	1.28211e-15	7.66261e-14	24.4137	0.633124	0.794598	0.161473	10	2035312	R	II		IGR	opensea	IGR-opensea		NA	NA
cg17301052	-0.154572	0.491952	-8.51494	1.29197e-15	7.71516e-14	24.4061	0.426376	0.580948	0.154572	5	3387075	F	II		IGR	opensea	IGR-opensea		NA	NA
cg13503382	-0.154421	0.548704	-8.51494	1.29198e-15	7.71516e-14	24.4061	0.483192	0.637613	0.154421	1	4726757	R	I	AJAP1	Body	island	Body-island	chr1:4726576-4726867	NA	NA
cg02432860	-0.186174	0.742278	-8.51163	1.32122e-15	7.86505e-14	24.384	0.663294	0.849469	0.186174	22	17489187	R	I	GAB4	TSS200	island	TSS200-island	chr22:17488274-17489194	NA	NA
cg13223509	-0.155568	0.622542	-8.51077	1.32893e-15	7.90834e-14	24.3782	0.556543	0.712111	0.155568	12	4543316	F	II	FGF6	3'UTR	opensea	3'UTR-opensea		NA	NA		rs2241286
cg08479865	-0.159554	0.629306	-8.50678	1.36531e-15	8.09006e-14	24.3516	0.561616	0.721171	0.159554	3	113897550	R	II	DRD3	1stExon	opensea	1stExon-opensea		NA	TRUE
cg13819319	-0.154805	0.758702	-8.50629	1.36984e-15	8.10895e-14	24.3483	0.693027	0.847832	0.154805	14	104917395	F	I		IGR	opensea	IGR-opensea		NA	NA
cg06968859	-0.150383	0.346104	-8.50543	1.37779e-15	8.15334e-14	24.3426	0.282305	0.432688	0.150383	2	80724209	F	II	CTNNA2	Body	opensea	Body-opensea		NA	TRUE
cg19312667	0.162534	0.455445	8.50483	1.38338e-15	8.177e-14	24.3386	0.524399	0.361865	-0.162534	4	25090491	F	II		IGR	island	IGR-island	chr4:25090106-25090510	NA	TRUE
cg24547885	0.187851	0.346664	8.50121	1.41767e-15	8.35641e-14	24.3144	0.426358	0.238508	-0.187851	2	179914868	F	II		IGR	opensea	IGR-opensea		NA	TRUE
cg01140416	-0.195249	0.569879	-8.501	1.41969e-15	8.36509e-14	24.313	0.487046	0.682295	0.195249	7	1293629	F	I		IGR	opensea	IGR-opensea		NA	NA
cg11026867	-0.154995	0.626592	-8.50083	1.42129e-15	8.37225e-14	24.3119	0.560837	0.715832	0.154995	12	6473643	R	II	SCNN1A	Body	shore	Body-shore	chr12:6472660-6473322	NA	NA
cg10431499	-0.188369	0.720371	-8.49854	1.44347e-15	8.48764e-14	24.2966	0.640456	0.828826	0.188369	10	2393904	F	I		IGR	opensea	IGR-opensea		NA	NA		rs10508232
cg05091238	0.172039	0.466047	8.49718	1.45681e-15	8.55882e-14	24.2875	0.539034	0.366994	-0.172039	3	157813609	F	I		IGR	shore	IGR-shore	chr3:157815581-157816095	NA	NA		rs80105466
cg12823329	-0.176271	0.66718	-8.49587	1.46976e-15	8.62908e-14	24.2788	0.592398	0.768669	0.176271	14	101496029	R	I	MIR494	Body	opensea	Body-opensea		NA	NA
cg25209132	-0.170231	0.688665	-8.49455	1.48298e-15	8.69305e-14	24.2699	0.616446	0.786677	0.170231	20	59969413	F	II	CDH4	Body	shelf	Body-shelf	chr20:59965576-59965790	NA	NA		rs6121730
cg20557710	-0.195549	0.75747	-8.49367	1.49177e-15	8.73888e-14	24.2641	0.674509	0.870059	0.195549	12	2788782	F	I	CACNA1C	Body	island	Body-island	chr12:2788614-2788879	NA	NA		rs72552065
cg03445151	-0.174293	0.508036	-8.4932	1.49655e-15	8.75978e-14	24.2609	0.434093	0.608387	0.174293	2	23516881	F	I		IGR	opensea	IGR-opensea		NA	TRUE		rs28681156
cg02096296	-0.181975	0.710789	-8.49184	1.51036e-15	8.83484e-14	24.2518	0.633587	0.815562	0.181975	2	1018046	F	I	SNTG2	Body	opensea	Body-opensea		NA	NA
cg10017293	0.188992	0.375469	8.48641	1.56676e-15	9.13808e-14	24.2156	0.455648	0.266656	-0.188992	12	51640305	F	I	SMAGP	Body	opensea	Body-opensea		NA	TRUE
cg12412531	-0.16506	0.680131	-8.48457	1.58633e-15	9.24027e-14	24.2034	0.610105	0.775165	0.16506	12	1943758	F	I	LRTM2	Body	opensea	Body-opensea		NA	NA
cg22388417	-0.17084	0.581215	-8.48376	1.59504e-15	9.285e-14	24.198	0.508737	0.679577	0.17084	8	134657812	R	II		IGR	opensea	IGR-opensea		TRUE	TRUE
cg05761458	-0.16034	0.743647	-8.48371	1.59562e-15	9.28688e-14	24.1976	0.675624	0.835964	0.16034	16	88163698	R	I		IGR	island	IGR-island	chr16:88163684-88163918	NA	NA
cg01265662	-0.155206	0.41179	-8.48147	1.61993e-15	9.41471e-14	24.1827	0.345945	0.501152	0.155206	2	197504046	F	I	CCDC150	TSS1500	shore	TSS1500-shore	chr2:197504191-197504558	NA	NA
cg09350880	-0.191802	0.635517	-8.48116	1.62329e-15	9.43116e-14	24.1806	0.554146	0.745948	0.191802	14	73136973	R	I	DPF3	3'UTR	opensea	3'UTR-opensea		NA	TRUE
cg12056501	-0.155725	0.615841	-8.48035	1.63218e-15	9.47826e-14	24.1752	0.549776	0.705501	0.155725	7	142576211	R	II	TRPV6	Body	opensea	Body-opensea		NA	NA
cg17627328	-0.177315	0.487127	-8.47708	1.66866e-15	9.66984e-14	24.1534	0.411902	0.589217	0.177315	5	5146343	F	I	ADAMTS16	Body	opensea	Body-opensea		NA	NA		rs1019747
cg08883213	-0.188304	0.451467	-8.47581	1.68296e-15	9.74485e-14	24.145	0.371581	0.559884	0.188304	19	55728836	R	I		IGR	shore	IGR-shore	chr19:55728345-55728629	NA	NA
cg15475714	-0.172793	0.63825	-8.47508	1.69135e-15	9.79033e-14	24.14	0.564945	0.737737	0.172793	12	128304430	R	II		IGR	opensea	IGR-opensea		NA	TRUE		rs11059374
cg12828073	-0.168433	0.652539	-8.47494	1.69298e-15	9.79814e-14	24.1391	0.581082	0.749515	0.168433	20	62795688	R	II	MYT1	TSS200	opensea	TSS200-opensea		NA	NA
cg21851391	-0.160142	0.607462	-8.47433	1.69988e-15	9.83181e-14	24.1351	0.539523	0.699665	0.160142	8	1448998	F	II	DLGAP2	TSS1500	opensea	TSS1500-opensea		NA	NA
cg02245119	-0.156144	0.555902	-8.46925	1.75916e-15	1.01372e-13	24.1012	0.489659	0.645804	0.156144	4	113269890	F	II	ALPK1	5'UTR	opensea	5'UTR-opensea		TRUE	TRUE
cg12205822	-0.202309	0.727663	-8.4687	1.76578e-15	1.01721e-13	24.0975	0.641835	0.844144	0.202309	12	2613941	R	I	CACNA1C	Body	opensea	Body-opensea		NA	NA
cg02514000	-0.151696	0.700202	-8.46842	1.76906e-15	1.01861e-13	24.0957	0.635846	0.787542	0.151696	7	70702212	R	II	WBSCR17	Body	opensea	Body-opensea		NA	TRUE
cg23959798	-0.155704	0.573261	-8.46792	1.77499e-15	1.02171e-13	24.0924	0.507205	0.662909	0.155704	1	4567204	R	II		IGR	opensea	IGR-opensea		NA	NA
cg01255513	-0.152407	0.580266	-8.46695	1.78669e-15	1.02778e-13	24.0859	0.515608	0.668015	0.152407	19	13365923	R	II	CACNA1A	Body	island	Body-island	chr19:13365922-13366158	NA	NA
cg07568233	-0.155622	0.617285	-8.46618	1.79605e-15	1.0325e-13	24.0807	0.551264	0.706886	0.155622	16	7382520	R	II	A2BP1	Body	opensea	Body-opensea		NA	NA
cg27583071	-0.154965	0.638603	-8.45863	1.88975e-15	1.0812e-13	24.0305	0.57286	0.727825	0.154965	2	451769	F	II		IGR	opensea	IGR-opensea		NA	NA		rs67177246
cg16409977	-0.157162	0.616137	-8.4584	1.89273e-15	1.08273e-13	24.0289	0.549462	0.706624	0.157162	12	4099941	R	I		IGR	opensea	IGR-opensea		NA	NA
cg02484411	-0.158436	0.549289	-8.4569	1.912e-15	1.09307e-13	24.0189	0.482074	0.64051	0.158436	2	493514	F	II		IGR	shore	IGR-shore	chr2:495193-495834	NA	NA
cg04755345	-0.151024	0.59331	-8.45657	1.91618e-15	1.09493e-13	24.0168	0.529239	0.680263	0.151024	2	105500602	F	II		IGR	opensea	IGR-opensea		NA	TRUE		rs35942321
cg03797537	-0.153177	0.683614	-8.4537	1.9537e-15	1.11443e-13	23.9976	0.61863	0.771806	0.153177	13	112899567	F	II		IGR	shelf	IGR-shelf	chr13:112895427-112895708	NA	NA
cg12055993	-0.166683	0.640549	-8.45335	1.95831e-15	1.11688e-13	23.9953	0.569835	0.736518	0.166683	12	132862057	R	I	GALNT9	Body	shore	Body-shore	chr12:132862586-132862956	NA	NA
cg01218150	-0.161586	0.655614	-8.45017	2.00068e-15	1.13852e-13	23.9742	0.587063	0.748649	0.161586	13	20965971	F	II		IGR	island	IGR-island	chr13:20965958-20966509	NA	NA
cg06634886	-0.158797	0.6117	-8.44999	2.00317e-15	1.13922e-13	23.9729	0.544332	0.703129	0.158797	5	5033763	R	II	LOC340094	TSS1500	opensea	TSS1500-opensea		NA	NA
cg16603012	-0.159654	0.608743	-8.44896	2.01704e-15	1.14566e-13	23.9661	0.541011	0.700665	0.159654	16	88879593	R	I	APRT	TSS1500	shore	TSS1500-shore	chr16:88877712-88878936	NA	NA
cg07463848	-0.151131	0.594992	-8.44821	2.02724e-15	1.15091e-13	23.9611	0.530876	0.682007	0.151131	8	49985379	F	II	C8orf22	5'UTR	opensea	5'UTR-opensea		NA	NA		rs6980664
cg02795546	-0.156389	0.625896	-8.44811	2.02859e-15	1.1515e-13	23.9605	0.559549	0.715938	0.156389	1	247697875	R	II	OR2C3	TSS1500	shelf	TSS1500-shelf	chr1:247694035-247694501	NA	NA
cg01554970	-0.17988	0.692999	-8.44722	2.0408e-15	1.15733e-13	23.9546	0.616687	0.796567	0.17988	16	88941173	R	II		IGR	shelf	IGR-shelf	chr16:88943427-88943669	NA	NA
cg13357249	-0.168557	0.496259	-8.44596	2.05816e-15	1.16645e-13	23.9462	0.42475	0.593306	0.168557	1	151170306	F	II	PIP5K1A	TSS1500	shore	TSS1500-shore	chr1:151170847-151171532	NA	NA
cg22943388	-0.155462	0.621027	-8.44054	2.13472e-15	1.20472e-13	23.9101	0.555074	0.710535	0.155462	12	132076630	F	II		IGR	opensea	IGR-opensea		NA	NA
cg01515155	-0.163148	0.580102	-8.44039	2.13694e-15	1.20579e-13	23.9091	0.510888	0.674036	0.163148	11	55579363	R	II	OR5L1	1stExon	opensea	1stExon-opensea		NA	NA
cg01975957	-0.163661	0.576797	-8.43974	2.14626e-15	1.21086e-13	23.9048	0.507365	0.671026	0.163661	1	152798912	F	II	LCE1A	TSS1500	opensea	TSS1500-opensea		NA	NA
cg17064981	-0.150405	0.71734	-8.43842	2.1654e-15	1.21993e-13	23.896	0.653532	0.803937	0.150405	11	126936873	F	II		IGR	opensea	IGR-opensea		NA	NA
cg07982896	-0.15666	0.665278	-8.43802	2.17123e-15	1.22265e-13	23.8934	0.598816	0.755476	0.15666	19	13365938	R	II	CACNA1A	Body	island	Body-island	chr19:13365922-13366158	NA	NA
cg07626366	-0.169735	0.689316	-8.43681	2.18902e-15	1.23093e-13	23.8853	0.617308	0.787043	0.169735	7	40939069	R	II		IGR	opensea	IGR-opensea		NA	NA
cg02010763	-0.16733	0.448271	-8.43655	2.19281e-15	1.23249e-13	23.8836	0.377282	0.544613	0.16733	15	61044829	F	I	RORA	Body	opensea	Body-opensea		NA	TRUE
cg20962500	-0.150494	0.641223	-8.43618	2.19834e-15	1.23492e-13	23.8811	0.577377	0.727871	0.150494	1	149174971	F	II		IGR	opensea	IGR-opensea		NA	NA
cg09338302	-0.158162	0.647957	-8.43256	2.2526e-15	1.26255e-13	23.857	0.580858	0.73902	0.158162	7	1325757	R	I		IGR	shelf	IGR-shelf	chr7:1328525-1329029	NA	NA
cg00221794	0.151198	0.492934	8.43248	2.25378e-15	1.26282e-13	23.8565	0.557079	0.40588	-0.151198	2	20776620	F	II		IGR	opensea	IGR-opensea		NA	NA
cg27235829	-0.163429	0.612354	-8.43011	2.28993e-15	1.28089e-13	23.8408	0.54302	0.706449	0.163429	1	158390759	R	II	OR10K2	TSS200	opensea	TSS200-opensea		NA	NA
cg01310473	0.17371	0.462154	8.42863	2.31287e-15	1.29252e-13	23.831	0.535849	0.362138	-0.17371	7	76829168	R	II	CCDC146	Body	opensea	Body-opensea		NA	TRUE
cg08335510	-0.211243	0.755454	-8.42323	2.39854e-15	1.33542e-13	23.795	0.665836	0.877078	0.211243	7	144966808	R	I		IGR	opensea	IGR-opensea		NA	NA			rs34971860
cg00223136	-0.210116	0.599762	-8.42113	2.43257e-15	1.35249e-13	23.7811	0.510622	0.720737	0.210116	5	3609364	F	I		IGR	shelf	IGR-shelf	chr5:3606488-3607135	NA	NA
cg27130240	-0.151593	0.831927	-8.42081	2.43778e-15	1.35455e-13	23.779	0.767615	0.919208	0.151593	16	88943533	R	I	CBFA2T3	Body	island	Body-island	chr16:88943427-88943669	NA	NA
cg22044308	-0.156979	0.662423	-8.42038	2.44493e-15	1.35756e-13	23.7761	0.595825	0.752804	0.156979	1	152635226	R	II	LCE2D	TSS1500	opensea	TSS1500-opensea		NA	NA
cg21475065	-0.157454	0.625634	-8.42037	2.44508e-15	1.35756e-13	23.7761	0.558835	0.71629	0.157454	7	147336337	R	I	CNTNAP2	Body	opensea	Body-opensea		NA	TRUE
cg11006791	-0.168169	0.596224	-8.42	2.4512e-15	1.36033e-13	23.7736	0.52488	0.693048	0.168169	5	2547287	R	II		IGR	opensea	IGR-opensea		NA	NA
cg05008004	-0.152988	0.638078	-8.41569	2.52322e-15	1.39536e-13	23.745	0.573174	0.726162	0.152988	8	2609691	F	II		IGR	opensea	IGR-opensea		NA	NA		rs7012995
cg16679832	-0.175246	0.797198	-8.41488	2.53699e-15	1.40211e-13	23.7396	0.722851	0.898097	0.175246	1	4008081	F	I		IGR	opensea	IGR-opensea		NA	NA
cg03635863	-0.172632	0.536628	-8.41334	2.56342e-15	1.41455e-13	23.7294	0.46339	0.636022	0.172632	5	6134449	R	II		IGR	opensea	IGR-opensea		NA	TRUE
cg11737413	-0.163741	0.641161	-8.40956	2.62941e-15	1.44808e-13	23.7043	0.571695	0.735436	0.163741	14	104801102	R	II		IGR	shore	IGR-shore	chr14:104800444-104800977	NA	NA
cg26606257	-0.163854	0.6024	-8.40946	2.63104e-15	1.44876e-13	23.7037	0.532886	0.69674	0.163854	2	1879380	F	II	MYT1L	Body	opensea	Body-opensea		NA	NA
cg24311564	-0.200647	0.715161	-8.40734	2.66888e-15	1.46579e-13	23.6896	0.630038	0.830685	0.200647	7	154542313	R	I	DPP6	Body	island	Body-island	chr7:154542059-154542348	NA	NA
cg06072835	-0.167247	0.608606	-8.40687	2.67724e-15	1.46983e-13	23.6865	0.537652	0.7049	0.167247	16	86112019	F	I		IGR	opensea	IGR-opensea		TRUE	NA
cg09130728	-0.172524	0.729086	-8.40686	2.67746e-15	1.46983e-13	23.6864	0.655894	0.828418	0.172524	2	21881746	F	II		IGR	opensea	IGR-opensea		NA	TRUE
cg16843056	-0.154421	0.557008	-8.40508	2.7097e-15	1.48617e-13	23.6746	0.491496	0.645917	0.154421	8	144279677	F	II		IGR	opensea	IGR-opensea		NA	NA
cg26102295	-0.163495	0.619409	-8.40477	2.71543e-15	1.48909e-13	23.6725	0.550047	0.713542	0.163495	7	1423622	F	I		IGR	shore	IGR-shore	chr7:1423824-1424053	NA	NA
cg25552937	-0.155449	0.727542	-8.40436	2.72283e-15	1.49292e-13	23.6698	0.661595	0.817043	0.155449	1	4842472	R	I	AJAP1	3'UTR	opensea	3'UTR-opensea		NA	NA
cg00186815	-0.191306	0.598973	-8.40373	2.73435e-15	1.49855e-13	23.6656	0.517813	0.709119	0.191306	8	1048135	F	I		IGR	shore	IGR-shore	chr8:1048559-1048873	NA	NA		rs75127419
cg07614018	0.19264	0.333938	8.40266	2.75405e-15	1.5082e-13	23.6585	0.415664	0.223025	-0.19264	19	18811575	R	I	CRTC1	Body	island	Body-island	chr19:18811561-18811791	TRUE	TRUE
cg03528824	-0.152736	0.53655	-8.40174	2.77123e-15	1.51623e-13	23.6524	0.471753	0.624489	0.152736	11	125110227	R	II	PKNOX2	5'UTR	opensea	5'UTR-opensea		NA	TRUE
cg07944396	-0.161108	0.591409	-8.40134	2.77859e-15	1.51956e-13	23.6498	0.52306	0.684168	0.161108	16	7382514	R	II	A2BP1	Body	opensea	Body-opensea		NA	NA
cg02811362	-0.16808	0.686921	-8.40006	2.80255e-15	1.53104e-13	23.6413	0.615614	0.783694	0.16808	20	49618509	R	II		IGR	shore	IGR-shore	chr20:49620446-49620680	NA	NA
cg03594972	-0.15831	0.532539	-8.39965	2.81039e-15	1.53486e-13	23.6385	0.465378	0.623687	0.15831	5	3659656	R	II		IGR	opensea	IGR-opensea		NA	NA
cg17406268	-0.15602	0.694082	-8.39829	2.83606e-15	1.5463e-13	23.6296	0.627892	0.783912	0.15602	12	108540664	R	II	WSCD2	5'UTR	opensea	5'UTR-opensea		NA	TRUE
cg22115706	-0.15018	0.6044	-8.39498	2.89991e-15	1.57754e-13	23.6076	0.540687	0.690867	0.15018	7	130125719	R	II	MEST	TSS1500	shore	TSS1500-shore	chr7:130126017-130126801	NA	NA
cg08189043	-0.167416	0.584324	-8.3943	2.91311e-15	1.584e-13	23.6031	0.513299	0.680715	0.167416	14	104862680	R	II		IGR	opensea	IGR-opensea		NA	NA
cg23624133	-0.164986	0.614505	-8.39361	2.92667e-15	1.59041e-13	23.5985	0.544511	0.709496	0.164986	1	152816168	F	II	LCE6A	Body	opensea	Body-opensea		NA	NA
cg26864714	-0.227368	0.720212	-8.39355	2.92789e-15	1.59084e-13	23.5981	0.623753	0.85112	0.227368	10	133208907	F	I		IGR	opensea	IGR-opensea		NA	NA		rs79279237
cg27318774	-0.182097	0.692493	-8.39268	2.94501e-15	1.59966e-13	23.5923	0.61524	0.797336	0.182097	5	2547310	R	I		IGR	opensea	IGR-opensea		NA	NA
cg08074534	0.168409	0.359189	8.38947	3.00904e-15	1.63002e-13	23.5711	0.430635	0.262226	-0.168409	6	100895143	R	I	SIM1	Body	island	Body-island	chr6:100895007-100895246	NA	TRUE
cg18278184	0.190537	0.455439	8.38613	3.0773e-15	1.66299e-13	23.549	0.536272	0.345736	-0.190537	10	70847430	R	II	SRGN	TSS1500	opensea	TSS1500-opensea		NA	NA
cg08610862	0.156012	0.603173	8.38564	3.08749e-15	1.66825e-13	23.5457	0.66936	0.513348	-0.156012	1	197888469	F	II	LHX9	Body	shore	Body-shore	chr1:197887088-197887791	NA	NA
cg07898087	-0.150874	0.554407	-8.38554	3.08949e-15	1.66901e-13	23.5451	0.4904	0.641274	0.150874	4	17060364	F	II		IGR	opensea	IGR-opensea		NA	TRUE		rs55716191
cg19463193	-0.157255	0.56692	-8.38053	3.19517e-15	1.71896e-13	23.5118	0.500205	0.65746	0.157255	15	68564546	R	II		IGR	opensea	IGR-opensea		TRUE	TRUE
cg08177968	-0.152936	0.646562	-8.3801	3.20428e-15	1.72361e-13	23.509	0.58168	0.734616	0.152936	16	59788728	F	II	LOC644649	Body	shore	Body-shore	chr16:59788792-59789072	NA	NA
cg00589520	-0.154383	0.460344	-8.37519	3.31171e-15	1.77451e-13	23.4765	0.394848	0.549231	0.154383	7	23513039	F	II		IGR	shore	IGR-shore	chr7:23513534-23514412	NA	NA
cg06542302	-0.151615	0.629863	-8.37508	3.31397e-15	1.77493e-13	23.4758	0.565541	0.717156	0.151615	12	132924218	F	II		IGR	shore	IGR-shore	chr12:132922117-132922443	NA	NA
cg00347856	-0.161612	0.680218	-8.37398	3.33871e-15	1.78606e-13	23.4684	0.611655	0.773268	0.161612	7	53879253	R	II		IGR	opensea	IGR-opensea		NA	NA
cg24860560	-0.171898	0.609027	-8.37175	3.38888e-15	1.80967e-13	23.4537	0.536101	0.707999	0.171898	8	143057294	F	I		IGR	shelf	IGR-shelf	chr8:143054784-143055048	NA	NA
cg11944110	-0.150313	0.458269	-8.3707	3.4129e-15	1.82034e-13	23.4467	0.3945	0.544813	0.150313	12	117581067	F	I		IGR	opensea	IGR-opensea		TRUE	NA
cg07350919	-0.179969	0.598647	-8.37013	3.42584e-15	1.82564e-13	23.443	0.522297	0.702265	0.179969	5	168174935	R	I	SLIT3	Body	opensea	Body-opensea		NA	NA	low-CpG:168107175-168107525
cg11407681	-0.159041	0.618593	-8.3698	3.43337e-15	1.82909e-13	23.4408	0.551121	0.710162	0.159041	1	166039918	R	II	FAM78B	Body	opensea	Body-opensea		NA	NA
cg08765631	-0.155275	0.586087	-8.36856	3.46224e-15	1.84284e-13	23.4326	0.520213	0.675488	0.155275	4	16731545	R	II	LDB2	Body	opensea	Body-opensea		NA	TRUE
cg01129246	-0.160661	0.666396	-8.36738	3.48972e-15	1.8561e-13	23.4248	0.598237	0.758898	0.160661	4	43032307	R	II	GRXCR1	Body	opensea	Body-opensea		NA	NA
cg27577720	-0.160914	0.625378	-8.36729	3.4918e-15	1.85693e-13	23.4242	0.557112	0.718025	0.160914	12	128245658	R	II		IGR	island	IGR-island	chr12:128245592-128245836	NA	NA
cg20694572	-0.16586	0.568847	-8.36551	3.53363e-15	1.8764e-13	23.4124	0.498482	0.664342	0.16586	1	152331529	R	II	FLG2	5'UTR	opensea	5'UTR-opensea		NA	NA
cg26170133	-0.1576	0.619219	-8.36422	3.5642e-15	1.89069e-13	23.4039	0.552358	0.709958	0.1576	8	49959180	F	II		IGR	opensea	IGR-opensea		NA	NA
cg22952849	-0.173984	0.657824	-8.35983	3.67078e-15	1.94208e-13	23.3748	0.584013	0.757996	0.173984	10	131665896	F	I	EBF3	Body	shore	Body-shore	chr10:131666016-131666315	NA	NA
cg22902194	-0.168649	0.631464	-8.35918	3.68675e-15	1.9491e-13	23.3705	0.559916	0.728565	0.168649	5	3539154	R	I		IGR	shelf	IGR-shelf	chr5:3535630-3536355	NA	NA
cg26157270	-0.153518	0.685721	-8.35873	3.69774e-15	1.95434e-13	23.3676	0.620592	0.77411	0.153518	2	80532937	R	II	CTNNA2	Body	shore	Body-shore	chr2:80531367-80531719	NA	NA			rs74368920
cg23545828	-0.153542	0.553716	-8.35132	3.88579e-15	2.04324e-13	23.3186	0.488577	0.64212	0.153542	10	125454530	F	II	GPR26	3'UTR	opensea	3'UTR-opensea		NA	NA
cg04682087	-0.188709	0.734757	-8.3491	3.94398e-15	2.07112e-13	23.3039	0.654699	0.843408	0.188709	2	875946	F	I		IGR	opensea	IGR-opensea		NA	NA		rs36100556
cg01149929	-0.187161	0.607007	-8.34407	4.07906e-15	2.13522e-13	23.2707	0.527605	0.714767	0.187161	5	15750836	R	II	FBXL7	Body	opensea	Body-opensea		NA	TRUE
cg00225623	0.201182	0.293288	8.34324	4.10176e-15	2.14523e-13	23.2652	0.378638	0.177456	-0.201182	13	24845891	R	II	SPATA13	Body	opensea	Body-opensea		TRUE	TRUE
cg10052782	-0.169289	0.653072	-8.34109	4.16111e-15	2.17374e-13	23.251	0.581253	0.750542	0.169289	16	27063429	F	II		IGR	opensea	IGR-opensea		NA	NA
cg05940691	-0.24403	0.614893	-8.34047	4.17859e-15	2.18161e-13	23.2469	0.511365	0.755395	0.24403	1	241912764	F	I	WDR64	Body	opensea	Body-opensea		NA	NA
cg00844246	-0.176792	0.79041	-8.33958	4.20339e-15	2.19297e-13	23.2411	0.715407	0.892199	0.176792	10	134928055	F	I	GPR123	Body	shore	Body-shore	chr10:134925815-134926878	NA	NA
cg03627350	-0.16871	0.737001	-8.33869	4.22862e-15	2.20422e-13	23.2351	0.665427	0.834137	0.16871	10	134694425	R	I		IGR	shore	IGR-shore	chr10:134692851-134693252	NA	NA			rs34283423
cg24582475	-0.155057	0.641587	-8.33803	4.24722e-15	2.21295e-13	23.2308	0.575805	0.730862	0.155057	1	247615433	R	II	OR2B11	TSS200	shore	TSS200-shore	chr1:247614695-247614944	NA	NA
cg01558403	-0.162644	0.504987	-8.33769	4.25705e-15	2.21776e-13	23.2285	0.435986	0.59863	0.162644	5	40309379	R	II		IGR	opensea	IGR-opensea		NA	TRUE
cg08038219	-0.167095	0.570795	-8.33573	4.31314e-15	2.24341e-13	23.2156	0.499906	0.667001	0.167095	20	62031924	F	II		IGR	island	IGR-island	chr20:62031417-62032423	NA	NA
cg23603027	-0.18313	0.704201	-8.33524	4.32742e-15	2.24954e-13	23.2123	0.626509	0.80964	0.18313	2	466712	R	I		IGR	shore	IGR-shore	chr2:467849-468659	NA	NA
cg14842771	-0.164104	0.701536	-8.3345	4.34885e-15	2.25808e-13	23.2075	0.631917	0.79602	0.164104	7	142558879	F	II	EPHB6	5'UTR	opensea	5'UTR-opensea		NA	NA		rs8177125
cg18423210	-0.18348	0.800645	-8.33377	4.37015e-15	2.26783e-13	23.2026	0.722806	0.906285	0.18348	19	17756507	F	I	UNC13A	Body	shore	Body-shore	chr19:17758055-17758337	NA	NA
cg17470497	-0.157726	0.608495	-8.33324	4.38543e-15	2.27478e-13	23.1992	0.541581	0.699306	0.157726	1	248401161	R	II	OR2M4	TSS1500	opensea	TSS1500-opensea		NA	NA
cg26783057	0.189594	0.408415	8.3331	4.38976e-15	2.27604e-13	23.1982	0.488849	0.299255	-0.189594	10	118891670	F	I	VAX1	3'UTR	shore	3'UTR-shore	chr10:118892161-118892639	NA	NA		rs74159040
cg11917579	-0.166019	0.673865	-8.33214	4.41789e-15	2.28898e-13	23.1919	0.603433	0.769452	0.166019	10	2815429	R	II		IGR	island	IGR-island	chr10:2815003-2815469	NA	NA
cg02869444	-0.153551	0.532071	-8.33081	4.45724e-15	2.30605e-13	23.1832	0.466928	0.620479	0.153551	10	110998760	F	II		IGR	opensea	IGR-opensea		NA	TRUE
cg16859165	-0.155191	0.700697	-8.32927	4.50352e-15	2.32766e-13	23.173	0.634858	0.790049	0.155191	18	76601647	R	II		IGR	shore	IGR-shore	chr18:76601754-76601963	NA	NA
cg04741211	0.168887	0.450014	8.32821	4.53548e-15	2.34216e-13	23.166	0.521663	0.352776	-0.168887	2	42399049	F	II	EML4	Body	shelf	Body-shelf	chr2:42396301-42396933	NA	NA
cg09531376	-0.165456	0.702324	-8.32532	4.62401e-15	2.38242e-13	23.1469	0.632131	0.797587	0.165456	11	133234073	R	II	OPCML	Body	shelf	Body-shelf	chr11:133230884-133231645	NA	NA
cg16577588	-0.15532	0.66136	-8.32266	4.70678e-15	2.42057e-13	23.1294	0.595467	0.750787	0.15532	1	158079311	R	II		IGR	shelf	IGR-shelf	chr1:158083270-158083540	NA	NA
cg19961228	-0.197265	0.724527	-8.32217	4.72232e-15	2.42717e-13	23.1261	0.640839	0.838104	0.197265	10	133326951	F	I		IGR	opensea	IGR-opensea		NA	NA		rs4751406
cg08390979	-0.153749	0.522825	-8.32206	4.72578e-15	2.42861e-13	23.1254	0.457599	0.611347	0.153749	16	6094220	F	II	A2BP1	5'UTR	opensea	5'UTR-opensea		NA	TRUE
cg24006005	-0.153113	0.692232	-8.32175	4.7355e-15	2.43233e-13	23.1234	0.627275	0.780388	0.153113	5	163894343	R	II		IGR	opensea	IGR-opensea		NA	NA
cg06430753	-0.162679	0.564683	-8.32137	4.74777e-15	2.43782e-13	23.1208	0.495668	0.658347	0.162679	5	958808	F	II		IGR	island	IGR-island	chr5:958785-959172	TRUE	NA
cg10024799	-0.167963	0.573996	-8.32112	4.75546e-15	2.44142e-13	23.1192	0.502739	0.670702	0.167963	12	2641381	R	II	CACNA1C	Body	opensea	Body-opensea		NA	TRUE
cg27271738	-0.190108	0.682805	-8.31958	4.80483e-15	2.46326e-13	23.109	0.602153	0.792261	0.190108	16	88166905	F	I		IGR	shore	IGR-shore	chr16:88165560-88166034	NA	NA		rs74040320
cg03056513	-0.161623	0.615752	-8.31931	4.81344e-15	2.4669e-13	23.1073	0.547184	0.708807	0.161623	10	133317583	R	II		IGR	shore	IGR-shore	chr10:133318028-133318324	NA	NA
cg15609462	-0.15448	0.726631	-8.31893	4.82575e-15	2.47153e-13	23.1047	0.661095	0.815574	0.15448	15	98646401	R	I		IGR	opensea	IGR-opensea		NA	NA
cg20236424	-0.161688	0.526522	-8.31888	4.82729e-15	2.47196e-13	23.1044	0.457927	0.619615	0.161688	13	101910811	R	I	NALCN	Body	opensea	Body-opensea		NA	NA
cg20518446	-0.16338	0.377876	-8.31808	4.85323e-15	2.48278e-13	23.0991	0.308563	0.471943	0.16338	11	62315034	F	I	AHNAK	TSS1500	island	TSS1500-island	chr11:62314761-62315054	NA	NA
cg19917714	-0.162462	0.662901	-8.31601	4.92069e-15	2.51159e-13	23.0855	0.593978	0.756439	0.162462	1	205011227	F	I	CNTN2	TSS1500	opensea	TSS1500-opensea		NA	NA
cg08944086	-0.218864	0.670299	-8.31547	4.93846e-15	2.51994e-13	23.0819	0.577447	0.796311	0.218864	10	1229080	F	I	ADARB2	3'UTR	shore	3'UTR-shore	chr10:1230813-1231214	NA	NA		rs17156072
cg14353278	-0.164509	0.617608	-8.3143	4.97713e-15	2.53716e-13	23.0742	0.547817	0.712325	0.164509	2	21229231	F	II	APOB	Body	opensea	Body-opensea		NA	NA	low-CpG:21082521-21083452
cg00730694	-0.152377	0.569004	-8.3142	4.98064e-15	2.53828e-13	23.0735	0.50436	0.656736	0.152377	8	139144720	F	II	FAM135B	3'UTR	opensea	3'UTR-opensea		NA	TRUE		rs71532161
cg05829696	-0.165543	0.618158	-8.31419	4.98074e-15	2.53828e-13	23.0735	0.547928	0.713471	0.165543	8	140488084	R	II		IGR	opensea	IGR-opensea		NA	TRUE
cg06020182	-0.152581	0.588199	-8.31323	5.01297e-15	2.55291e-13	23.0672	0.523468	0.676049	0.152581	2	365232	F	II		IGR	opensea	IGR-opensea		NA	NA
cg07402939	-0.163608	0.652643	-8.30943	5.14184e-15	2.61189e-13	23.0421	0.583234	0.746842	0.163608	13	112927331	R	II		IGR	opensea	IGR-opensea		NA	NA
cg00509996	-0.162919	0.590105	-8.30818	5.18493e-15	2.6323e-13	23.0339	0.520988	0.683907	0.162919	4	7595397	R	I	SORCS2	Body	shore	Body-shore	chr4:7593369-7593586	NA	NA
cg11501364	-0.161256	0.65763	-8.30802	5.19027e-15	2.63426e-13	23.0328	0.589219	0.750474	0.161256	13	99851660	F	II	UBAC2	TSS1500	shore	TSS1500-shore	chr13:99852386-99853552	NA	NA
cg23549179	-0.15564	0.629309	-8.307	5.22581e-15	2.65118e-13	23.0261	0.56328	0.71892	0.15564	12	113228545	F	II	RPH3A	TSS1500	opensea	TSS1500-opensea		NA	NA
cg03224812	-0.158287	0.573997	-8.30629	5.2505e-15	2.66259e-13	23.0215	0.506845	0.665132	0.158287	12	3807404	F	II	EFCAB4B	5'UTR	opensea	5'UTR-opensea		TRUE	TRUE
cg24703400	-0.161852	0.620304	-8.30335	5.35466e-15	2.70817e-13	23.0021	0.551639	0.713491	0.161852	2	21880071	R	II		IGR	opensea	IGR-opensea		NA	TRUE
cg20107996	-0.178492	0.71605	-8.3033	5.35639e-15	2.70866e-13	23.0017	0.640326	0.818819	0.178492	4	12886669	R	I		IGR	opensea	IGR-opensea		NA	TRUE
cg03522247	-0.177288	0.730704	-8.30144	5.42344e-15	2.73835e-13	22.9895	0.655491	0.832779	0.177288	12	33205429	F	I		IGR	opensea	IGR-opensea		NA	NA		rs12830581
cg22506490	-0.15936	0.570054	-8.29695	5.58823e-15	2.81092e-13	22.9599	0.502446	0.661807	0.15936	1	177002228	R	II	ASTN1	Body	opensea	Body-opensea		NA	TRUE
cg19486175	-0.156708	0.664421	-8.29536	5.64767e-15	2.83765e-13	22.9495	0.597939	0.754646	0.156708	2	129657517	F	II		IGR	shore	IGR-shore	chr2:129659299-129659568	NA	NA
cg16262963	-0.170583	0.64244	-8.29421	5.69119e-15	2.85554e-13	22.9419	0.570071	0.740655	0.170583	14	104851903	F	I		IGR	opensea	IGR-opensea		NA	NA
cg27437413	-0.159834	0.700282	-8.29382	5.70622e-15	2.86188e-13	22.9393	0.632474	0.792308	0.159834	16	15596215	R	II	C16orf45	1stExon	opensea	1stExon-opensea		TRUE	TRUE
cg03653518	-0.165195	0.648964	-8.292	5.7756e-15	2.89426e-13	22.9274	0.578881	0.744077	0.165195	10	134692406	R	I		IGR	shore	IGR-shore	chr10:134692851-134693252	NA	TRUE
cg21615663	-0.160332	0.649557	-8.29096	5.81582e-15	2.91239e-13	22.9205	0.581538	0.74187	0.160332	16	19727911	F	II	IQCK	5'UTR	shore	5'UTR-shore	chr16:19729194-19729896	NA	NA
cg02140020	-0.174184	0.634473	-8.2887	5.90422e-15	2.95256e-13	22.9056	0.560576	0.734761	0.174184	12	2613914	R	II	CACNA1C	Body	opensea	Body-opensea		NA	NA
cg22055891	-0.15641	0.517906	-8.28795	5.93399e-15	2.96539e-13	22.9006	0.451551	0.607961	0.15641	2	138829973	R	II		IGR	opensea	IGR-opensea		NA	TRUE
cg26465547	-0.174597	0.741169	-8.28646	5.99312e-15	2.99204e-13	22.8909	0.667098	0.841695	0.174597	7	152602179	R	I		IGR	shore	IGR-shore	chr7:152600496-152600950	NA	NA
cg01182863	-0.175596	0.772172	-8.28429	6.08053e-15	3.0298e-13	22.8766	0.697677	0.873273	0.175596	11	1464792	F	I	BRSK2	Body	island	Body-island	chr11:1464295-1464899	NA	NA
cg04927931	0.197606	0.53599	8.28168	6.18702e-15	3.07819e-13	22.8594	0.619823	0.422217	-0.197606	6	100911701	F	I	SIM1	TSS200	shore	TSS200-shore	chr6:100912071-100913337	TRUE	TRUE		rs80193484
cg10143323	-0.162836	0.689447	-8.27811	6.33595e-15	3.14404e-13	22.8359	0.620365	0.783201	0.162836	11	127332027	F	II		IGR	opensea	IGR-opensea		NA	TRUE
cg01963754	-0.235837	0.687795	-8.27784	6.34725e-15	3.14878e-13	22.8342	0.587742	0.82358	0.235837	13	111977248	R	I	C13orf16	Body	shore	Body-shore	chr13:111978588-111979099	NA	NA
cg07493834	-0.153337	0.617568	-8.27138	6.6263e-15	3.27325e-13	22.7917	0.552516	0.705853	0.153337	2	22114272	R	II		IGR	opensea	IGR-opensea		NA	TRUE			rs72795944
cg26536999	-0.17495	0.596553	-8.26987	6.69317e-15	3.30447e-13	22.7818	0.522332	0.697282	0.17495	5	3823510	R	II		IGR	opensea	IGR-opensea		NA	NA
cg21545548	-0.158101	0.626316	-8.2698	6.69638e-15	3.3056e-13	22.7813	0.559244	0.717344	0.158101	6	26296575	F	II		IGR	opensea	IGR-opensea		NA	TRUE
cg09671989	-0.196403	0.712618	-8.26973	6.69965e-15	3.30676e-13	22.7809	0.629295	0.825698	0.196403	16	88330828	R	I		IGR	opensea	IGR-opensea		NA	NA
cg01106649	-0.153434	0.694357	-8.26829	6.76424e-15	3.33271e-13	22.7714	0.629264	0.782698	0.153434	2	127516969	R	II		IGR	opensea	IGR-opensea		NA	TRUE
cg01587049	-0.154601	0.641922	-8.26746	6.80138e-15	3.34963e-13	22.766	0.576334	0.730935	0.154601	14	101492406	R	II	MIR329-2	TSS1500	opensea	TSS1500-opensea		NA	NA
cg07886472	-0.193023	0.763751	-8.26565	6.88422e-15	3.38532e-13	22.754	0.681863	0.874886	0.193023	13	112054947	R	I		IGR	shore	IGR-shore	chr13:112054425-112054644	NA	NA
cg17447867	-0.15103	0.673999	-8.26557	6.88747e-15	3.38602e-13	22.7536	0.609926	0.760956	0.15103	20	47016568	R	II		IGR	shelf	IGR-shelf	chr20:47013682-47013970	NA	NA
cg00101350	-0.150743	0.747785	-8.26545	6.8933e-15	3.38842e-13	22.7527	0.683833	0.834577	0.150743	22	39883192	R	I	MGAT3	5'UTR	shore	5'UTR-shore	chr22:39883515-39885010	NA	NA
cg18323376	-0.168239	0.57488	-8.26305	7.00438e-15	3.43974e-13	22.7369	0.503506	0.671745	0.168239	20	30028241	R	I	DEFB123	TSS200	opensea	TSS200-opensea		NA	NA
cg16252110	-0.241351	0.6987	-8.26229	7.03968e-15	3.45285e-13	22.732	0.596308	0.837659	0.241351	5	2866877	F	I		IGR	island	IGR-island	chr5:2866699-2867005	NA	NA		rs10044519
cg18184033	-0.1505	0.725482	-8.25884	7.20331e-15	3.52495e-13	22.7093	0.661634	0.812134	0.1505	4	16943323	R	II		IGR	opensea	IGR-opensea		NA	TRUE
cg23791718	-0.150021	0.543919	-8.25871	7.2094e-15	3.52649e-13	22.7085	0.480274	0.630295	0.150021	8	60034928	F	II		IGR	shelf	IGR-shelf	chr8:60030134-60032356	NA	NA
cg08375882	-0.152603	0.719303	-8.25737	7.2739e-15	3.55563e-13	22.6997	0.654562	0.807165	0.152603	16	89107658	F	I		IGR	shore	IGR-shore	chr16:89108886-89109130	NA	NA
cg20383637	-0.151629	0.509202	-8.25657	7.31253e-15	3.57257e-13	22.6945	0.444875	0.596504	0.151629	2	2965744	R	II		IGR	opensea	IGR-opensea		NA	NA
cg00818493	-0.150978	0.617797	-8.25647	7.31741e-15	3.57399e-13	22.6938	0.553746	0.704723	0.150978	8	142612885	R	II		IGR	opensea	IGR-opensea		NA	NA
cg01163404	-0.165373	0.654129	-8.25589	7.34578e-15	3.58688e-13	22.69	0.583971	0.749344	0.165373	12	129822259	R	II	TMEM132D	Body	opensea	Body-opensea		NA	TRUE
cg15771735	-0.150889	0.566999	-8.25527	7.37619e-15	3.59978e-13	22.6859	0.502986	0.653874	0.150889	6	57614321	R	II		IGR	opensea	IGR-opensea		NA	TRUE
cg07320595	-0.163737	0.671242	-8.25407	7.43541e-15	3.62573e-13	22.678	0.601778	0.765515	0.163737	5	156485233	F	II	HAVCR1	1stExon	opensea	1stExon-opensea		NA	NA
cg26359646	-0.182125	0.794621	-8.25334	7.47136e-15	3.6408e-13	22.6732	0.717356	0.899481	0.182125	10	132600786	F	I		IGR	opensea	IGR-opensea		NA	NA		rs11017483
cg04131792	-0.151836	0.702968	-8.2528	7.49831e-15	3.65097e-13	22.6697	0.638553	0.790389	0.151836	5	3320943	R	II		IGR	shelf	IGR-shelf	chr5:3324644-3324973	NA	NA
cg06446408	-0.161016	0.624675	-8.25124	7.57683e-15	3.68671e-13	22.6594	0.556365	0.717381	0.161016	16	73266679	R	II		IGR	opensea	IGR-opensea		NA	NA
cg12161887	-0.167818	0.728206	-8.25119	7.5791e-15	3.68732e-13	22.6591	0.657011	0.824829	0.167818	12	132847907	F	I	GALNT9	Body	island	Body-island	chr12:132847640-132847955	NA	NA
cg01758799	-0.159802	0.652493	-8.25099	7.58928e-15	3.69171e-13	22.6578	0.584698	0.744501	0.159802	11	1446346	R	I	BRSK2	Body	opensea	Body-opensea		NA	NA
cg18677812	-0.150776	0.632237	-8.24882	7.69968e-15	3.7359e-13	22.6435	0.568272	0.719048	0.150776	3	38936985	R	II	SCN11A	Body	opensea	Body-opensea		NA	NA
cg12615205	-0.155463	0.679557	-8.24794	7.74477e-15	3.75525e-13	22.6378	0.613603	0.769066	0.155463	1	3495611	F	II	MEGF6	Body	opensea	Body-opensea		NA	NA
cg10063845	-0.152479	0.595061	-8.2468	7.80359e-15	3.78123e-13	22.6303	0.530373	0.682852	0.152479	2	80363347	F	II	CTNNA2	Body	opensea	Body-opensea		NA	TRUE
cg23705108	-0.159703	0.576351	-8.2425	8.02983e-15	3.88302e-13	22.6021	0.508598	0.668301	0.159703	4	27102875	R	II		IGR	opensea	IGR-opensea		NA	NA
cg15852352	-0.171432	0.544625	-8.24216	8.04783e-15	3.89121e-13	22.5999	0.471897	0.643328	0.171432	1	158368889	F	II	OR10T2	1stExon	opensea	1stExon-opensea		NA	NA		rs56704148
cg23613023	-0.151617	0.700794	-8.24204	8.05425e-15	3.89343e-13	22.5991	0.636472	0.788089	0.151617	12	115353932	R	II		IGR	opensea	IGR-opensea		NA	TRUE
cg11245682	-0.176302	0.669091	-8.24202	8.05567e-15	3.89343e-13	22.5989	0.594296	0.770599	0.176302	2	130468678	F	II		IGR	opensea	IGR-opensea		NA	NA
cg12387154	0.185146	0.423272	8.239	8.21872e-15	3.96002e-13	22.5791	0.501819	0.316672	-0.185146	6	32119639	R	I	PRRT1	1stExon	shore	1stExon-shore	chr6:32118101-32118544	NA	NA
cg01311955	-0.15174	0.549123	-8.23868	8.23632e-15	3.96744e-13	22.577	0.484748	0.636489	0.15174	11	132965250	F	II	OPCML	Body	opensea	Body-opensea		NA	TRUE		rs12365292
cg25936482	-0.160044	0.563178	-8.23823	8.26082e-15	3.97818e-13	22.5741	0.495281	0.655325	0.160044	5	15928686	R	II	FBXL7	Body	shore	Body-shore	chr5:15928088-15928518	NA	NA
cg13263472	-0.160407	0.698608	-8.23736	8.30878e-15	3.99903e-13	22.5684	0.630556	0.790963	0.160407	14	102593156	F	I	HSP90AA1	Body	opensea	Body-opensea		NA	TRUE
cg04588514	-0.1581	0.722647	-8.23505	8.43727e-15	4.05665e-13	22.5532	0.655574	0.813675	0.1581	20	57766071	R	II	ZNF831	TSS200	shore	TSS200-shore	chr20:57766396-57767896	NA	NA
cg12114200	-0.203468	0.589944	-8.23158	8.63412e-15	4.14301e-13	22.5305	0.503625	0.707093	0.203468	13	112074876	R	I		IGR	opensea	IGR-opensea		NA	NA
cg05131064	-0.157117	0.729558	-8.22698	8.90145e-15	4.26334e-13	22.5004	0.662902	0.820019	0.157117	11	133228366	R	II	OPCML	Body	shelf	Body-shelf	chr11:133230884-133231645	NA	NA			rs71477440
cg11342941	-0.189376	0.796222	-8.22585	8.96894e-15	4.29281e-13	22.4929	0.715881	0.905257	0.189376	6	161561121	F	I	AGPAT4	Body	opensea	Body-opensea		NA	NA		rs2009830
cg14080475	0.159573	0.214105	8.22517	9.00919e-15	4.31094e-13	22.4885	0.281803	0.12223	-0.159573	9	117150495	F	II	AKNA	5'UTR	opensea	5'UTR-opensea		TRUE	TRUE
cg05353872	-0.164311	0.472482	-8.22456	9.0459e-15	4.32563e-13	22.4845	0.402774	0.567085	0.164311	1	248366399	R	I	OR2M3	1stExon	opensea	1stExon-opensea		NA	NA
cg11694519	0.153595	0.542002	8.22073	9.27876e-15	4.427e-13	22.4594	0.607164	0.453569	-0.153595	11	111783563	F	I	CRYAB	TSS1500	opensea	TSS1500-opensea		NA	TRUE
cg23657718	-0.169068	0.558854	-8.2204	9.29884e-15	4.4354e-13	22.4573	0.487128	0.656196	0.169068	4	1495933	F	I		IGR	shore	IGR-shore	chr4:1494542-1494753	NA	NA		rs78749337
cg05852395	-0.154613	0.552033	-8.21968	9.34346e-15	4.45374e-13	22.4525	0.486439	0.641053	0.154613	17	72589093	R	I	CD300LD	TSS1500	opensea	TSS1500-opensea		NA	NA
cg05944877	-0.168758	0.698959	-8.21966	9.34477e-15	4.45377e-13	22.4524	0.627365	0.796123	0.168758	16	24197863	R	II	PRKCB	Body	opensea	Body-opensea		NA	TRUE
cg08466571	-0.158744	0.573196	-8.2196	9.34865e-15	4.45504e-13	22.452	0.50585	0.664594	0.158744	2	130468655	F	II		IGR	opensea	IGR-opensea		NA	NA
cg01065161	-0.180243	0.656675	-8.21843	9.42163e-15	4.48863e-13	22.4443	0.580208	0.760452	0.180243	10	98130127	F	I	TLL2	Body	opensea	Body-opensea		NA	NA
cg22877570	0.200447	0.378849	8.21719	9.49953e-15	4.52379e-13	22.4362	0.463887	0.26344	-0.200447	3	171175950	F	I	TNIK	Body	shore	Body-shore	chr3:171177829-171178964	NA	NA
cg25832274	-0.156638	0.607549	-8.21683	9.52183e-15	4.53337e-13	22.4339	0.541096	0.697734	0.156638	10	130789492	F	II		IGR	opensea	IGR-opensea		NA	NA
cg06613817	-0.193414	0.785759	-8.21664	9.53418e-15	4.53865e-13	22.4326	0.703705	0.897118	0.193414	1	119910670	F	I	HAO2	TSS1500	opensea	TSS1500-opensea		NA	NA
cg25961432	-0.150977	0.638475	-8.21643	9.54722e-15	4.54366e-13	22.4313	0.574424	0.725401	0.150977	19	48497784	F	II	ELSPBP1	TSS200	opensea	TSS200-opensea		NA	NA		rs12974184
cg19534870	-0.150943	0.706322	-8.21569	9.59444e-15	4.56252e-13	22.4264	0.642286	0.793228	0.150943	10	133448537	F	II		IGR	shore	IGR-shore	chr10:133449492-133449716	NA	NA
cg17256679	-0.150419	0.680352	-8.21352	9.73339e-15	4.62218e-13	22.4122	0.616538	0.766957	0.150419	17	32647709	F	II	CCL8	Body	opensea	Body-opensea		NA	NA		rs3138037
cg13215579	-0.192024	0.73113	-8.21266	9.78901e-15	4.64401e-13	22.4066	0.649666	0.841689	0.192024	14	25900545	F	I		IGR	opensea	IGR-opensea		NA	NA
cg17208869	-0.156461	0.682963	-8.21005	9.95996e-15	4.71643e-13	22.3895	0.616586	0.773047	0.156461	5	41071879	R	II	HEATR7B2	TSS1500	opensea	TSS1500-opensea		NA	NA
cg17550009	-0.162347	0.755283	-8.20773	1.0114e-14	4.78058e-13	22.3743	0.686408	0.848756	0.162347	20	61974165	R	I		IGR	island	IGR-island	chr20:61973861-61974297	NA	NA
cg07258897	-0.153374	0.634542	-8.20725	1.01464e-14	4.79528e-13	22.3712	0.569474	0.722848	0.153374	12	108576009	F	II	WSCD2	5'UTR	opensea	5'UTR-opensea		NA	TRUE
cg00950086	-0.152707	0.653425	-8.20704	1.01606e-14	4.80136e-13	22.3698	0.588641	0.741347	0.152707	10	130124650	R	II		IGR	opensea	IGR-opensea		NA	NA
cg04541368	0.150733	0.577964	8.20684	1.01741e-14	4.80711e-13	22.3685	0.641911	0.491179	-0.150733	5	92909429	F	I	FLJ42709	Body	shore	Body-shore	chr5:92906239-92908875	NA	TRUE
cg17646721	-0.158239	0.685794	-8.20378	1.03823e-14	4.89904e-13	22.3485	0.618663	0.776902	0.158239	2	80197796	F	II	CTNNA2	Body	opensea	Body-opensea		NA	TRUE		rs17261321
cg10767420	-0.206551	0.62811	-8.20152	1.05394e-14	4.96992e-13	22.3337	0.540482	0.747033	0.206551	2	2581557	R	I		IGR	opensea	IGR-opensea		NA	NA
cg07010687	-0.158538	0.57677	-8.20142	1.05459e-14	4.97232e-13	22.3331	0.509511	0.668049	0.158538	5	1217576	F	II	SLC6A19	Body	shore	Body-shore	chr5:1218487-1218704	NA	NA
cg22978025	-0.161424	0.69502	-8.19856	1.07477e-14	5.06153e-13	22.3144	0.626537	0.787961	0.161424	10	2308972	F	I		IGR	opensea	IGR-opensea		NA	NA		rs75394241
cg00350158	-0.158284	0.542695	-8.19751	1.08227e-14	5.09484e-13	22.3075	0.475544	0.633828	0.158284	11	40713713	F	II		IGR	opensea	IGR-opensea		NA	TRUE			rs72896609
cg03420866	-0.175559	0.772556	-8.19621	1.09169e-14	5.13317e-13	22.299	0.698076	0.873635	0.175559	12	129754307	F	I	TMEM132D	Body	opensea	Body-opensea		NA	NA		rs55811510
cg20799165	-0.151576	0.450211	-8.19197	1.12279e-14	5.2636e-13	22.2712	0.385906	0.537482	0.151576	8	136302154	R	II	LOC286094	Body	opensea	Body-opensea		NA	NA
cg19602728	-0.179077	0.464749	-8.1906	1.13299e-14	5.30729e-13	22.2623	0.388777	0.567854	0.179077	4	1496334	F	I		IGR	shore	IGR-shore	chr4:1494542-1494753	NA	NA		rs77734564
cg01667007	-0.190172	0.801752	-8.19007	1.13696e-14	5.3231e-13	22.2589	0.721073	0.911245	0.190172	12	133168332	F	I		IGR	shore	IGR-shore	chr12:133168946-133169191	NA	NA
cg12584111	-0.188557	0.640305	-8.18871	1.14725e-14	5.3671e-13	22.25	0.560311	0.748868	0.188557	7	141943158	F	I	MOXD2	Body	opensea	Body-opensea		NA	NA
cg06221609	-0.161023	0.59626	-8.18846	1.14915e-14	5.37388e-13	22.2483	0.527947	0.68897	0.161023	1	152799138	F	II	LCE1A	TSS1500	opensea	TSS1500-opensea		NA	NA
cg19731065	-0.154563	0.710882	-8.18836	1.1499e-14	5.37601e-13	22.2477	0.64531	0.799873	0.154563	14	97674065	R	II		IGR	opensea	IGR-opensea		NA	NA
cg20011075	-0.198696	0.739541	-8.18831	1.15029e-14	5.37713e-13	22.2474	0.655245	0.853942	0.198696	1	4008090	F	I		IGR	opensea	IGR-opensea		NA	NA
cg21672992	-0.1509	0.573202	-8.18247	1.19561e-14	5.56518e-13	22.2092	0.509184	0.660084	0.1509	15	86584249	F	II		IGR	opensea	IGR-opensea		NA	TRUE
cg08333858	-0.197167	0.769622	-8.17723	1.2378e-14	5.74451e-13	22.175	0.685975	0.883142	0.197167	6	6058413	R	I		IGR	island	IGR-island	chr6:6058355-6058664	NA	NA
cg17185622	-0.160511	0.642564	-8.17428	1.26222e-14	5.84652e-13	22.1557	0.574468	0.734979	0.160511	8	98103016	R	II	PGCP	Body	opensea	Body-opensea		NA	TRUE
cg01406072	-0.160653	0.581648	-8.17398	1.26468e-14	5.85721e-13	22.1538	0.513492	0.674145	0.160653	13	112201036	R	II		IGR	shore	IGR-shore	chr13:112200212-112200893	NA	NA
cg15531536	-0.157228	0.718974	-8.17149	1.28568e-14	5.94375e-13	22.1375	0.652271	0.8095	0.157228	10	131214543	R	II		IGR	opensea	IGR-opensea		NA	NA
cg08214060	-0.15213	0.587184	-8.16881	1.30869e-14	6.04086e-13	22.12	0.522644	0.674775	0.15213	11	132107534	R	II	NTM	Body	opensea	Body-opensea		NA	NA
cg09309085	-0.152397	0.662335	-8.16745	1.32055e-14	6.09057e-13	22.1111	0.597681	0.750078	0.152397	20	40706193	F	II	PTPRT	3'UTR	opensea	3'UTR-opensea		NA	NA		rs1884039
cg08571738	-0.166678	0.583277	-8.16715	1.32312e-14	6.10121e-13	22.1092	0.512565	0.679243	0.166678	2	2605398	F	II		IGR	opensea	IGR-opensea		NA	NA
cg00206063	-0.169531	0.634174	-8.16426	1.34863e-14	6.21111e-13	22.0904	0.562252	0.731783	0.169531	10	3805252	R	II		IGR	opensea	IGR-opensea		NA	NA
cg14245619	-0.160748	0.590928	-8.16214	1.36766e-14	6.2937e-13	22.0765	0.522732	0.68348	0.160748	20	62037718	F	II	KCNQ2	3'UTR	island	3'UTR-island	chr20:62037458-62037719	NA	NA		rs6122440
cg01422767	-0.160107	0.581566	-8.15558	1.42829e-14	6.54844e-13	22.0338	0.513642	0.673749	0.160107	7	1369374	R	II		IGR	shore	IGR-shore	chr7:1370386-1370863	NA	NA
cg24185447	-0.183743	0.546526	-8.15542	1.4298e-14	6.55287e-13	22.0327	0.468575	0.652318	0.183743	5	15935879	R	II	FBXL7	Body	shore	Body-shore	chr5:15936641-15937316	NA	NA
cg14215310	-0.187338	0.622107	-8.15512	1.43257e-14	6.56224e-13	22.0308	0.54263	0.729969	0.187338	8	1414188	R	I		IGR	opensea	IGR-opensea		NA	NA
cg05563475	-0.153809	0.614304	-8.15333	1.44963e-14	6.63112e-13	22.0191	0.549052	0.702861	0.153809	5	3289014	R	II		IGR	opensea	IGR-opensea		NA	NA
cg04414975	-0.161769	0.624123	-8.15169	1.46543e-14	6.69746e-13	22.0084	0.555494	0.717263	0.161769	12	130333815	R	II	TMEM132D	Body	opensea	Body-opensea		NA	NA
cg17316078	-0.155325	0.653213	-8.15162	1.46616e-14	6.69992e-13	22.0079	0.587318	0.742643	0.155325	12	127221700	F	II		IGR	opensea	IGR-opensea		NA	NA
cg23049458	0.178512	0.481416	8.15091	1.473e-14	6.72437e-13	22.0033	0.557148	0.378637	-0.178512	1	62660624	R	I	L1TD1	5'UTR	island	5'UTR-island	chr1:62660555-62660946	NA	NA
cg26024530	-0.157475	0.723659	-8.15057	1.4763e-14	6.73688e-13	22.0011	0.656852	0.814327	0.157475	10	130281732	F	I		IGR	opensea	IGR-opensea		NA	NA
cg11152263	-0.160913	0.567108	-8.14921	1.48964e-14	6.79175e-13	21.9922	0.498842	0.659755	0.160913	7	569642	F	II		IGR	shore	IGR-shore	chr7:569812-570042	NA	NA		rs34042795	rs62433874
cg23833543	-0.16852	0.678996	-8.14888	1.4929e-14	6.80575e-13	21.9901	0.607502	0.776023	0.16852	8	144268531	R	II		IGR	shore	IGR-shore	chr8:144267329-144267824	NA	NA
cg26416241	-0.152946	0.590817	-8.14713	1.51019e-14	6.87675e-13	21.9787	0.525931	0.678877	0.152946	11	131557414	R	I	NTM	Body	shelf	Body-shelf	chr11:131560356-131560559	NA	NA
cg21418534	-0.184325	0.717929	-8.14309	1.55109e-14	7.04785e-13	21.9524	0.63973	0.824055	0.184325	13	112800020	R	I		IGR	opensea	IGR-opensea		NA	NA
cg20042908	-0.209887	0.762266	-8.14231	1.55905e-14	7.07957e-13	21.9473	0.673223	0.88311	0.209887	11	133852938	F	I		IGR	opensea	IGR-opensea		NA	NA		rs71477467
cg05718034	-0.178667	0.687969	-8.13854	1.59829e-14	7.2386e-13	21.9228	0.612171	0.790838	0.178667	1	7122667	R	I	CAMTA1	Body	island	Body-island	chr1:7122519-7122727	NA	NA
cg16665866	-0.201851	0.742139	-8.13407	1.64617e-14	7.43396e-13	21.8937	0.656506	0.858357	0.201851	16	1222626	F	I	CACNA1H	Body	shore	Body-shore	chr16:1221808-1222208	NA	NA
cg08903619	-0.171261	0.760937	-8.1315	1.6743e-14	7.54305e-13	21.8769	0.688281	0.859542	0.171261	13	53508092	R	I		IGR	opensea	IGR-opensea		NA	NA
cg07227743	-0.162957	0.67739	-8.12986	1.69253e-14	7.62039e-13	21.8663	0.608257	0.771214	0.162957	7	154474113	R	I	DPP6	Body	opensea	Body-opensea		NA	NA
cg00571339	-0.168016	0.558712	-8.12976	1.69359e-14	7.62424e-13	21.8656	0.487432	0.655448	0.168016	2	7567411	R	I		IGR	shelf	IGR-shelf	chr2:7571071-7571642	TRUE	NA
cg12200950	-0.152221	0.578421	-8.12695	1.72527e-14	7.7523e-13	21.8474	0.513842	0.666064	0.152221	19	34174777	R	II	CHST8	5'UTR	shore	5'UTR-shore	chr19:34175344-34175768	NA	NA
cg24527751	-0.151924	0.654915	-8.12562	1.74052e-14	7.81303e-13	21.8387	0.590462	0.742386	0.151924	2	171877888	R	II	TLK1	Body	opensea	Body-opensea		NA	TRUE
cg18737789	-0.153075	0.710942	-8.12523	1.74494e-14	7.82897e-13	21.8362	0.646001	0.799076	0.153075	11	40613630	F	II		IGR	opensea	IGR-opensea		NA	TRUE
cg26247168	-0.169284	0.604148	-8.12211	1.78126e-14	7.977e-13	21.8158	0.53233	0.701614	0.169284	11	119994722	F	I	TRIM29	Body	opensea	Body-opensea		NA	NA		rs586407
cg03145062	-0.156664	0.747414	-8.11973	1.80937e-14	8.08886e-13	21.8004	0.680951	0.837615	0.156664	17	50188449	R	II	CA10	Body	opensea	Body-opensea		NA	TRUE
cg09138028	-0.156532	0.627628	-8.11879	1.8206e-14	8.13303e-13	21.7943	0.561221	0.717753	0.156532	1	38802860	F	II		IGR	opensea	IGR-opensea		NA	TRUE
cg05283646	-0.174249	0.76772	-8.11638	1.84974e-14	8.25401e-13	21.7786	0.693796	0.868045	0.174249	8	1105957	R	I		IGR	island	IGR-island	chr8:1105614-1106066	NA	NA
cg05875421	0.151992	0.526794	8.11624	1.85141e-14	8.25757e-13	21.7777	0.591276	0.439283	-0.151992	14	91709951	F	II	GPR68	5'UTR	opensea	5'UTR-opensea		TRUE	TRUE
cg07486474	-0.242305	0.667922	-8.11612	1.8529e-14	8.26196e-13	21.7769	0.565126	0.807431	0.242305	4	628649	R	I	PDE6B	Body	opensea	Body-opensea		NA	NA
cg20741105	0.15937	0.512858	8.11553	1.86018e-14	8.28928e-13	21.7731	0.58047	0.421099	-0.15937	7	43686889	R	II	C7orf44	Body	opensea	Body-opensea		NA	TRUE
cg13303464	-0.153184	0.590359	-8.11549	1.86058e-14	8.29008e-13	21.7729	0.525372	0.678556	0.153184	10	130844209	F	I		IGR	opensea	IGR-opensea		NA	NA		rs36025489
cg20075700	-0.151908	0.647515	-8.11512	1.86519e-14	8.30607e-13	21.7704	0.583069	0.734977	0.151908	22	49376401	F	II		IGR	island	IGR-island	chr22:49376395-49376660	NA	NA
cg10453337	-0.166355	0.580738	-8.11154	1.90968e-14	8.48783e-13	21.7472	0.510163	0.676518	0.166355	5	7502014	F	II	ADCY2	Body	opensea	Body-opensea		NA	TRUE
cg08910550	-0.152832	0.668617	-8.11104	1.91591e-14	8.5124e-13	21.7439	0.603779	0.756611	0.152832	7	154542060	R	II	DPP6	Body	island	Body-island	chr7:154542059-154542348	NA	NA
cg00485748	-0.156148	0.546985	-8.10939	1.93686e-14	8.59488e-13	21.7332	0.48074	0.636888	0.156148	20	44662007	R	II	SLC12A5	Body	shore	Body-shore	chr20:44660342-44660948	NA	NA
cg26237595	-0.160521	0.739758	-8.10864	1.94652e-14	8.63192e-13	21.7283	0.671658	0.832179	0.160521	11	132955642	F	II	OPCML	Body	shelf	Body-shelf	chr11:132951692-132952260	NA	NA
cg15914908	-0.15401	0.627518	-8.10828	1.95113e-14	8.64861e-13	21.726	0.56218	0.716191	0.15401	12	133012468	F	II		IGR	shore	IGR-shore	chr12:133010683-133010929	NA	NA		rs11829996
cg07699149	-0.164917	0.764357	-8.10399	2.00693e-14	8.88067e-13	21.6982	0.694392	0.859309	0.164917	8	10987869	F	II	XKR6	Body	opensea	Body-opensea		NA	NA
cg10120897	-0.201947	0.773483	-8.10232	2.02914e-14	8.96685e-13	21.6873	0.687809	0.889756	0.201947	16	88498132	F	I	ZNF469	Body	island	Body-island	chr16:88498100-88498825	TRUE	NA		rs62047114
cg01117452	-0.154827	0.717006	-8.10108	2.04573e-14	9.0346e-13	21.6793	0.651322	0.806148	0.154827	14	72703626	F	I	RGS6	Body	opensea	Body-opensea		NA	NA
cg17824277	-0.152631	0.687315	-8.09965	2.06507e-14	9.11334e-13	21.67	0.622562	0.775193	0.152631	1	13838127	F	I		IGR	shore	IGR-shore	chr1:13839505-13840613	NA	TRUE
cg15128312	-0.15103	0.612608	-8.09887	2.07578e-14	9.15276e-13	21.6649	0.548535	0.699565	0.15103	19	58627859	F	II	ZSCAN18	Body	shore	Body-shore	chr19:58629309-58630241	NA	NA
cg22115892	-0.170273	0.732363	-8.09849	2.08088e-14	9.17413e-13	21.6625	0.660126	0.830399	0.170273	4	177198411	F	I		IGR	opensea	IGR-opensea		NA	TRUE
cg20536041	0.159922	0.416722	8.09729	2.09747e-14	9.23708e-13	21.6546	0.484567	0.324645	-0.159922	2	45029004	R	I		IGR	island	IGR-island	chr2:45028955-45029318	NA	NA
cg04372674	0.154658	0.408883	8.0967	2.10565e-14	9.2697e-13	21.6508	0.474495	0.319837	-0.154658	7	30951381	R	II	AQP1	TSS200	opensea	TSS200-opensea		NA	NA
cg26718232	-0.16438	0.754601	-8.09415	2.14117e-14	9.40885e-13	21.6343	0.684864	0.849244	0.16438	5	2633613	F	I		IGR	opensea	IGR-opensea		NA	NA		rs68185979
cg03299095	-0.160325	0.853787	-8.09223	2.16836e-14	9.51906e-13	21.6218	0.78577	0.946095	0.160325	15	25434533	R	I	SNORD115-11	TSS200	opensea	TSS200-opensea		NA	NA
cg10194573	-0.153693	0.589778	-8.09179	2.17476e-14	9.54259e-13	21.6189	0.524575	0.678268	0.153693	1	152730426	F	II	KPRP	TSS200	shelf	TSS200-shelf	chr1:152732958-152733338	NA	NA
cg21962324	-0.15402	0.67405	-8.09031	2.19604e-14	9.62999e-13	21.6093	0.608708	0.762729	0.15402	5	2547252	R	II		IGR	opensea	IGR-opensea		NA	NA
cg01804934	0.16314	0.354575	8.09018	2.19787e-14	9.63569e-13	21.6085	0.423787	0.260646	-0.16314	6	33041229	F	II	HLA-DPA1	Body	opensea	Body-opensea		NA	NA
cg05193110	-0.197654	0.724234	-8.08823	2.2262e-14	9.74333e-13	21.5959	0.64038	0.838035	0.197654	14	73137893	F	I	DPF3	Body	opensea	Body-opensea		NA	NA		rs17855716
cg10946576	-0.202617	0.692174	-8.0871	2.24284e-14	9.80897e-13	21.5885	0.606216	0.808833	0.202617	20	62079799	F	I	KCNQ2	Body	island	Body-island	chr20:62079615-62079912	NA	NA
cg18620300	-0.156835	0.582933	-8.08501	2.27385e-14	9.93137e-13	21.575	0.516397	0.673232	0.156835	5	15757078	F	II	FBXL7	Body	opensea	Body-opensea		NA	TRUE			rs58989236
cg06269631	-0.160256	0.707193	-8.08203	2.31874e-14	1.01121e-12	21.5557	0.639206	0.799462	0.160256	8	1132112	R	II		IGR	shore	IGR-shore	chr8:1132761-1132983	NA	NA
cg21755806	-0.156052	0.812985	-8.08118	2.33176e-14	1.01633e-12	21.5502	0.746781	0.902833	0.156052	8	1475257	F	I	DLGAP2	5'UTR	opensea	5'UTR-opensea		NA	NA
cg07981869	-0.166426	0.645918	-8.07983	2.35252e-14	1.02452e-12	21.5414	0.575313	0.741739	0.166426	19	34174665	F	I	CHST8	5'UTR	shore	5'UTR-shore	chr19:34175344-34175768	NA	NA			rs73926584
cg11249129	-0.150894	0.672362	-8.07939	2.35945e-14	1.02716e-12	21.5385	0.608346	0.75924	0.150894	4	4405844	R	II	D4S234E	Body	opensea	Body-opensea		NA	NA
cg02442572	-0.173958	0.685935	-8.07417	2.44164e-14	1.05872e-12	21.5047	0.612134	0.786093	0.173958	7	1303351	F	II		IGR	opensea	IGR-opensea		NA	NA
cg26732943	-0.154717	0.6684	-8.07374	2.44851e-14	1.06158e-12	21.502	0.602762	0.757479	0.154717	20	61986065	R	II	CHRNA4	Body	shelf	Body-shelf	chr20:61980564-61982373	NA	NA
cg17919152	-0.202981	0.659583	-8.06892	2.52738e-14	1.09262e-12	21.4707	0.57347	0.776451	0.202981	13	112858755	F	I		IGR	opensea	IGR-opensea		NA	NA
cg05369347	-0.156174	0.808868	-8.06633	2.57059e-14	1.1093e-12	21.454	0.742612	0.898786	0.156174	13	112057814	F	I		IGR	shelf	IGR-shelf	chr13:112054425-112054644	NA	NA
cg21167716	-0.172907	0.829047	-8.06531	2.58786e-14	1.11622e-12	21.4474	0.755692	0.928599	0.172907	12	132896743	F	I	GALNT9	Body	shore	Body-shore	chr12:132896299-132896569	TRUE	NA
cg04418647	-0.19287	0.790442	-8.06303	2.62698e-14	1.13161e-12	21.4326	0.708618	0.901488	0.19287	8	50653901	R	I		IGR	opensea	IGR-opensea		NA	NA
cg11977941	-0.170756	0.731331	-8.06264	2.63376e-14	1.13425e-12	21.43	0.658889	0.829645	0.170756	1	158746611	F	I	OR6N2	1stExon	opensea	1stExon-opensea		NA	NA			rs77219835
cg12805552	-0.158257	0.674363	-8.06188	2.64685e-14	1.13908e-12	21.4251	0.607224	0.765481	0.158257	10	1547717	F	II	ADARB2	Body	opensea	Body-opensea		NA	NA
cg00160828	-0.165726	0.625001	-8.06109	2.66063e-14	1.14432e-12	21.42	0.554693	0.720419	0.165726	8	2549270	F	I		IGR	opensea	IGR-opensea		NA	NA
cg02478172	-0.172405	0.775585	-8.05977	2.68379e-14	1.15318e-12	21.4115	0.702443	0.874848	0.172405	7	157468082	F	I	PTPRN2	Body	opensea	Body-opensea		NA	NA
cg25200152	0.161896	0.598294	8.0582	2.7115e-14	1.16412e-12	21.4013	0.666978	0.505082	-0.161896	1	147790458	R	I		IGR	shore	IGR-shore	chr1:147789652-147790094	NA	NA
cg26965639	-0.152348	0.598972	-8.05756	2.72299e-14	1.16835e-12	21.3972	0.53434	0.686688	0.152348	7	142606734	F	II	TRPV5	Body	opensea	Body-opensea		NA	NA
cg08019384	-0.168975	0.579181	-8.05701	2.73281e-14	1.17215e-12	21.3936	0.507494	0.676469	0.168975	7	3920439	F	II	SDK1	Body	opensea	Body-opensea		NA	NA
cg23796130	-0.150596	0.571833	-8.05688	2.73505e-14	1.17297e-12	21.3928	0.507944	0.65854	0.150596	7	41931493	F	II		IGR	opensea	IGR-opensea		NA	TRUE
cg01043336	-0.156783	0.723078	-8.05525	2.76455e-14	1.18407e-12	21.3822	0.656564	0.813347	0.156783	5	2371956	F	II		IGR	opensea	IGR-opensea		NA	NA		rs57547440
cg02947498	-0.154201	0.575606	-8.05225	2.81936e-14	1.20383e-12	21.3629	0.510188	0.664389	0.154201	14	90139566	R	II		IGR	opensea	IGR-opensea		NA	TRUE
cg16617795	-0.169826	0.752166	-8.0513	2.83712e-14	1.21069e-12	21.3567	0.680119	0.849945	0.169826	1	5895056	R	I		IGR	opensea	IGR-opensea		NA	NA
cg13480658	-0.152857	0.774812	-8.05122	2.83863e-14	1.2112e-12	21.3561	0.709963	0.862821	0.152857	1	4795012	F	I	AJAP1	Body	opensea	Body-opensea		NA	NA
cg09166502	-0.156734	0.672147	-8.03991	3.05703e-14	1.29428e-12	21.283	0.605654	0.762388	0.156734	5	3537990	R	II		IGR	shore	IGR-shore	chr5:3535630-3536355	NA	NA			rs6868770
cg22092126	-0.150205	0.617001	-8.03728	3.11001e-14	1.31501e-12	21.2661	0.553277	0.703482	0.150205	2	100371023	R	II	AFF3	Body	opensea	Body-opensea		NA	TRUE
cg05971966	0.166953	0.542586	8.03705	3.11486e-14	1.3166e-12	21.2645	0.613414	0.446461	-0.166953	5	40681137	F	I	PTGER4	Body	island	Body-island	chr5:40679502-40682081	TRUE	NA
cg20770989	-0.156574	0.666647	-8.03694	3.11702e-14	1.3172e-12	21.2639	0.600221	0.756795	0.156574	11	56113543	F	II	OR8K1	1stExon	opensea	1stExon-opensea		NA	NA		rs10896271
cg06163994	-0.168878	0.589624	-8.03686	3.11875e-14	1.31778e-12	21.2633	0.517979	0.686857	0.168878	8	132854760	F	II		IGR	opensea	IGR-opensea		NA	TRUE
cg16641358	-0.161962	0.505965	-8.0359	3.13824e-14	1.32585e-12	21.2572	0.437253	0.599216	0.161962	5	15930438	F	II	FBXL7	Body	shore	Body-shore	chr5:15928088-15928518	NA	TRUE
cg01292613	-0.159207	0.64296	-8.03509	3.15495e-14	1.3326e-12	21.2519	0.575418	0.734625	0.159207	19	56459108	F	II	NLRP8	TSS200	opensea	TSS200-opensea		NA	NA
cg02704181	-0.181193	0.580491	-8.03334	3.19131e-14	1.34701e-12	21.2406	0.503622	0.684815	0.181193	5	15572568	R	II	FBXL7	Body	opensea	Body-opensea		NA	TRUE
cg18496841	-0.188241	0.715588	-8.033	3.1985e-14	1.34957e-12	21.2384	0.635728	0.823969	0.188241	8	1495025	R	I	DLGAP2	5'UTR	shore	5'UTR-shore	chr8:1495105-1495333	NA	NA
cg01481609	-0.156123	0.612806	-8.03077	3.24551e-14	1.36829e-12	21.224	0.546572	0.702695	0.156123	10	134920351	F	I	GPR123	Body	shore	Body-shore	chr10:134918755-134918975	NA	NA		rs12359671
cg06937491	-0.184201	0.702822	-8.02982	3.26578e-14	1.37555e-12	21.2179	0.624676	0.808877	0.184201	12	1943722	R	I	LRTM2	Body	opensea	Body-opensea		NA	NA
cg11719576	-0.189059	0.634397	-8.02886	3.28634e-14	1.3834e-12	21.2117	0.55419	0.743249	0.189059	1	158153771	R	II	CD1D	Body	shelf	Body-shelf	chr1:158150620-158151503	NA	NA
cg19611193	0.159931	0.50692	8.02851	3.29397e-14	1.38612e-12	21.2094	0.57477	0.414839	-0.159931	6	25137864	F	II	CMAH	Body	shelf	Body-shelf	chr6:25139920-25140246	NA	TRUE
cg20480723	-0.159895	0.66683	-8.02778	3.30967e-14	1.39159e-12	21.2047	0.598996	0.758891	0.159895	17	415149	F	I	VPS53	3'UTR	opensea	3'UTR-opensea		TRUE	TRUE		rs77747256
cg05904338	-0.160535	0.606924	-8.02666	3.33404e-14	1.40118e-12	21.1975	0.538818	0.699353	0.160535	2	23546218	R	II		IGR	opensea	IGR-opensea		NA	NA
cg10948615	-0.15587	0.621015	-8.02492	3.37231e-14	1.4148e-12	21.1862	0.554888	0.710759	0.15587	2	21664657	F	II		IGR	opensea	IGR-opensea		NA	TRUE		rs1544858
cg16705697	-0.150195	0.616151	-8.02343	3.4054e-14	1.42718e-12	21.1766	0.552432	0.702627	0.150195	11	134731585	F	I		IGR	opensea	IGR-opensea		NA	NA
cg02778678	-0.179168	0.73011	-8.02137	3.45143e-14	1.44396e-12	21.1633	0.654099	0.833267	0.179168	20	62037503	F	I		IGR	island	IGR-island	chr20:62037458-62037719	NA	NA
cg25220990	-0.150316	0.420186	-8.0153	3.59133e-14	1.49658e-12	21.1241	0.356416	0.506731	0.150316	5	4206669	R	II		IGR	opensea	IGR-opensea		NA	TRUE
cg17782974	0.163757	0.445652	8.01495	3.59945e-14	1.49945e-12	21.1219	0.515125	0.351368	-0.163757	10	104406990	R	II	TRIM8	Body	shelf	Body-shelf	chr10:104401821-104404968	NA	NA
cg23519572	-0.192253	0.769838	-8.0142	3.61722e-14	1.50546e-12	21.1171	0.688276	0.880529	0.192253	13	114808934	F	I	RASA3	Body	shore	Body-shore	chr13:114806911-114807181	TRUE	NA
cg07403258	-0.179905	0.695506	-8.01244	3.65904e-14	1.52093e-12	21.1057	0.619183	0.799088	0.179905	13	112200864	F	I		IGR	island	IGR-island	chr13:112200212-112200893	NA	NA
cg09210956	-0.197441	0.719517	-8.01159	3.67942e-14	1.52852e-12	21.1002	0.635755	0.833195	0.197441	2	1358730	R	I	SNTG2	Body	opensea	Body-opensea		NA	NA
cg26643476	-0.150988	0.525452	-8.01071	3.70079e-14	1.53663e-12	21.0945	0.461396	0.612384	0.150988	12	123215684	F	II	GPR81	TSS1500	opensea	TSS1500-opensea		NA	NA
cg10424264	-0.160954	0.655997	-8.00932	3.7344e-14	1.54886e-12	21.0856	0.587713	0.748667	0.160954	5	180056301	F	I	FLT4	Body	shore	Body-shore	chr5:180055849-180056126	NA	NA
cg01642084	-0.153548	0.759796	-8.00668	3.79962e-14	1.5723e-12	21.0685	0.694654	0.848202	0.153548	2	105118579	F	I	LOC150568	Body	opensea	Body-opensea		NA	NA		rs1439670
cg13035219	-0.1923	0.513941	-8.00389	3.86956e-14	1.59866e-12	21.0506	0.432359	0.624659	0.1923	7	1403804	F	I		IGR	opensea	IGR-opensea		NA	NA		rs77139642
cg18305128	-0.160481	0.52981	-8.00381	3.87147e-14	1.59927e-12	21.0501	0.461728	0.622209	0.160481	5	3286296	F	II		IGR	opensea	IGR-opensea		NA	TRUE		rs4866545
cg20676475	-0.150967	0.506367	-8.0032	3.88695e-14	1.60365e-12	21.0461	0.442321	0.593288	0.150967	1	152552494	R	II	LCE3D	5'UTR	opensea	5'UTR-opensea		NA	NA
cg24412662	-0.1579	0.649797	-8.00285	3.89571e-14	1.60634e-12	21.0439	0.582809	0.740709	0.1579	1	2866667	R	II		IGR	opensea	IGR-opensea		NA	NA
cg09954251	-0.170887	0.667627	-8.00129	3.93577e-14	1.62082e-12	21.0338	0.59513	0.766017	0.170887	8	1278972	R	I		IGR	opensea	IGR-opensea		NA	NA
cg25225379	-0.213814	0.601899	-7.99987	3.97242e-14	1.63386e-12	21.0247	0.51119	0.725004	0.213814	8	143509263	F	I		IGR	shore	IGR-shore	chr8:143509372-143509630	NA	NA
cg15549700	-0.205797	0.670746	-7.99968	3.97731e-14	1.63568e-12	21.0235	0.583438	0.789236	0.205797	1	4722690	R	I	AJAP1	Body	shelf	Body-shelf	chr1:4726576-4726867	NA	NA
cg18949521	-0.155117	0.67077	-7.99923	3.98916e-14	1.64018e-12	21.0205	0.604962	0.76008	0.155117	6	29324300	F	II	OR5V1	TSS1500	opensea	TSS1500-opensea		NA	NA		rs75580481
cg20715048	-0.174632	0.661267	-7.99665	4.0569e-14	1.66556e-12	21.0039	0.587181	0.761813	0.174632	10	44680954	F	I		IGR	opensea	IGR-opensea		NA	TRUE
cg15160263	0.150355	0.399239	7.99426	4.12073e-14	1.68869e-12	20.9885	0.463026	0.312671	-0.150355	5	76923943	R	I		IGR	island	IGR-island	chr5:76923887-76924502	NA	NA
cg26126181	-0.19391	0.755849	-7.99376	4.13413e-14	1.69399e-12	20.9853	0.673584	0.867494	0.19391	5	6347990	R	I		IGR	opensea	IGR-opensea		NA	NA			rs34035449
cg01824948	-0.17238	0.740741	-7.99329	4.14689e-14	1.69884e-12	20.9823	0.66761	0.839989	0.17238	14	102057263	R	I		IGR	shelf	IGR-shelf	chr14:102053868-102054163	NA	NA
cg19384540	-0.15924	0.644657	-7.99253	4.1676e-14	1.70616e-12	20.9774	0.5771	0.73634	0.15924	19	30934550	F	II	ZNF536	Body	shore	Body-shore	chr19:30934822-30936626	NA	NA		rs61742740
cg26369259	-0.15701	0.721527	-7.99127	4.20195e-14	1.71866e-12	20.9693	0.654917	0.811927	0.15701	17	31340636	R	II	ACCN1	3'UTR	opensea	3'UTR-opensea		NA	NA
cg00377087	-0.179126	0.820658	-7.99122	4.20335e-14	1.71903e-12	20.969	0.744665	0.923791	0.179126	13	112901213	R	I		IGR	opensea	IGR-opensea		NA	NA
cg12405684	-0.168348	0.738131	-7.98879	4.27042e-14	1.74448e-12	20.9533	0.66671	0.835059	0.168348	11	1414627	R	I	BRSK2	Body	shelf	Body-shelf	chr11:1410119-1412346	NA	NA
cg07130639	-0.163593	0.771811	-7.98814	4.28865e-14	1.75015e-12	20.9491	0.702408	0.866001	0.163593	16	89145892	F	I		IGR	shore	IGR-shore	chr16:89146936-89147176	NA	NA
cg19250709	-0.162748	0.558144	-7.9878	4.29816e-14	1.75343e-12	20.947	0.489099	0.651847	0.162748	1	152783489	F	II	LCE1B	TSS1500	opensea	TSS1500-opensea		NA	NA
cg20542619	-0.20601	0.639283	-7.98763	4.30301e-14	1.75521e-12	20.9458	0.551885	0.757895	0.20601	18	77289104	F	I	NFATC1	3'UTR	island	3'UTR-island	chr18:77289018-77289464	NA	NA		rs1804953
cg03225476	-0.186047	0.645867	-7.98652	4.33433e-14	1.76679e-12	20.9387	0.566938	0.752985	0.186047	12	132680972	R	I	GALNT9	3'UTR	shore	3'UTR-shore	chr12:132682572-132682895	NA	NA
cg17628556	-0.179296	0.704628	-7.98587	4.35275e-14	1.77303e-12	20.9345	0.628563	0.807859	0.179296	7	56671052	R	I		IGR	opensea	IGR-opensea		NA	NA
cg00647046	-0.172563	0.72236	-7.98475	4.38456e-14	1.78404e-12	20.9273	0.649151	0.821715	0.172563	10	134734612	F	I		IGR	shore	IGR-shore	chr10:134735972-134736254	NA	NA		rs12263313
cg13485248	-0.162242	0.675653	-7.98277	4.44173e-14	1.80526e-12	20.9146	0.606823	0.769066	0.162242	2	2893732	F	II		IGR	opensea	IGR-opensea		NA	NA
cg14996220	0.151442	0.326285	7.97929	4.54367e-14	1.84192e-12	20.8922	0.390533	0.239091	-0.151442	12	85673270	F	I	ALX1	TSS1500	shore	TSS1500-shore	chr12:85673878-85674700	NA	NA
cg12485572	-0.179882	0.65904	-7.97524	4.66508e-14	1.88435e-12	20.8662	0.582726	0.762608	0.179882	8	115599097	R	II		IGR	opensea	IGR-opensea		NA	TRUE
cg06263372	-0.153956	0.596506	-7.97418	4.6975e-14	1.89681e-12	20.8593	0.531191	0.685147	0.153956	18	34850864	R	I	BRUNOL4	Body	shelf	Body-shelf	chr18:34854247-34855163	NA	NA
cg02303399	-0.153426	0.62511	-7.97413	4.69898e-14	1.89719e-12	20.859	0.56002	0.713446	0.153426	1	153175248	F	II	LELP1	TSS1500	opensea	TSS1500-opensea		NA	NA
cg12808290	-0.159174	0.632895	-7.97333	4.72354e-14	1.90647e-12	20.8539	0.565366	0.72454	0.159174	12	127206290	F	II		IGR	opensea	IGR-opensea		NA	NA			rs77537858
cg02987523	-0.153893	0.570856	-7.97211	4.76151e-14	1.92115e-12	20.846	0.505568	0.659461	0.153893	13	103978230	R	II		IGR	opensea	IGR-opensea		NA	TRUE
cg03654329	-0.176765	0.603095	-7.97015	4.82255e-14	1.94274e-12	20.8334	0.528104	0.704869	0.176765	1	2899954	R	I		IGR	opensea	IGR-opensea		NA	NA
cg12251828	-0.159467	0.573394	-7.97	4.82729e-14	1.94443e-12	20.8325	0.505741	0.665208	0.159467	7	142560197	F	II	EPHB6	5'UTR	opensea	5'UTR-opensea		NA	TRUE
cg03774288	-0.152616	0.675822	-7.96874	4.86721e-14	1.95941e-12	20.8243	0.611076	0.763692	0.152616	10	131647543	F	II	EBF3	Body	opensea	Body-opensea		NA	NA
cg18902148	-0.176729	0.67838	-7.96835	4.87946e-14	1.9639e-12	20.8219	0.603405	0.780133	0.176729	11	134682046	F	I		IGR	opensea	IGR-opensea		NA	NA
cg09148417	-0.15578	0.665125	-7.96738	4.91059e-14	1.97533e-12	20.8156	0.599037	0.754817	0.15578	5	3513521	R	II		IGR	opensea	IGR-opensea		NA	NA
cg25340966	0.155752	0.463029	7.96715	4.91785e-14	1.97759e-12	20.8141	0.529106	0.373354	-0.155752	1	119532195	R	I	TBX15	TSS200	island	TSS200-island	chr1:119531991-119532196	NA	TRUE
cg16178603	0.155476	0.445886	7.96633	4.94424e-14	1.98621e-12	20.8089	0.511845	0.356369	-0.155476	2	66667101	R	I	MEIS1	Body	opensea	Body-opensea		NA	NA
cg09066883	-0.161495	0.670534	-7.96437	5.00788e-14	2.00953e-12	20.7963	0.60202	0.763516	0.161495	7	157932951	R	I	PTPRN2	Body	opensea	Body-opensea		NA	NA
cg00485202	-0.159918	0.765038	-7.96351	5.03585e-14	2.01963e-12	20.7908	0.697194	0.857112	0.159918	15	100532781	R	I	ADAMTS17	Body	shore	Body-shore	chr15:100533145-100533372	NA	NA
cg22946562	-0.156804	0.539817	-7.96251	5.06866e-14	2.03076e-12	20.7844	0.473294	0.630098	0.156804	2	1880012	R	II	MYT1L	Body	opensea	Body-opensea		NA	NA
cg06358671	-0.191883	0.76443	-7.95677	5.26208e-14	2.09985e-12	20.7474	0.683025	0.874908	0.191883	4	5976157	F	I	C4orf50	Body	opensea	Body-opensea		NA	NA		rs78104477
cg18045100	-0.197719	0.385348	-7.95587	5.29271e-14	2.11137e-12	20.7417	0.301467	0.499186	0.197719	5	3764541	F	I		IGR	opensea	IGR-opensea		NA	NA
cg27128311	-0.154965	0.727067	-7.95578	5.29594e-14	2.1122e-12	20.7411	0.661324	0.816289	0.154965	16	1041333	F	I		IGR	island	IGR-island	chr16:1040965-1041365	NA	NA		rs73487676
cg14747065	-0.161675	0.796987	-7.95373	5.3671e-14	2.13892e-12	20.7279	0.728398	0.890073	0.161675	8	1136200	R	I		IGR	shore	IGR-shore	chr8:1137207-1138672	NA	NA
cg06184785	-0.162804	0.666861	-7.95325	5.38398e-14	2.14446e-12	20.7248	0.597793	0.760597	0.162804	15	90456924	R	II	C15orf38	TSS1500	shore	TSS1500-shore	chr15:90455562-90456263	NA	TRUE
cg13172906	-0.182044	0.574001	-7.94799	5.57132e-14	2.21004e-12	20.6911	0.49677	0.678814	0.182044	8	143694295	R	I	ARC	1stExon	shore	1stExon-shore	chr8:143694430-143696166	NA	NA
cg07851738	-0.153437	0.555089	-7.94792	5.57384e-14	2.21056e-12	20.6907	0.489994	0.643431	0.153437	8	131896788	F	II	ADCY8	Body	opensea	Body-opensea		NA	TRUE
cg06120979	-0.154374	0.721563	-7.94551	5.66199e-14	2.23987e-12	20.6752	0.656071	0.810445	0.154374	10	130506833	R	I		IGR	shore	IGR-shore	chr10:130508443-130508658	NA	NA
cg26321366	-0.151791	0.69225	-7.9447	5.69185e-14	2.25117e-12	20.67	0.627854	0.779645	0.151791	8	1496347	R	I	DLGAP2	5'UTR	shore	5'UTR-shore	chr8:1496731-1497884	NA	NA
cg21312148	-0.161848	0.508938	-7.94231	5.78114e-14	2.28073e-12	20.6547	0.440275	0.602124	0.161848	1	152636074	R	II	LCE2D	5'UTR	opensea	5'UTR-opensea		NA	NA
cg04946506	-0.154789	0.677102	-7.94182	5.79957e-14	2.28632e-12	20.6515	0.611434	0.766222	0.154789	14	104646441	R	II	KIF26A	3'UTR	island	3'UTR-island	chr14:104645957-104646478	NA	NA
cg07574896	-0.161965	0.704205	-7.94182	5.79976e-14	2.28632e-12	20.6515	0.635493	0.797458	0.161965	6	401453	R	I	IRF4	Body	opensea	Body-opensea		NA	NA
cg21289437	-0.157047	0.660227	-7.94117	5.82429e-14	2.29449e-12	20.6473	0.593601	0.750648	0.157047	13	112692270	R	II		IGR	shore	IGR-shore	chr13:112691292-112691533	NA	NA
cg26150142	-0.172367	0.628734	-7.93866	5.92029e-14	2.32798e-12	20.6312	0.555609	0.727976	0.172367	1	248102842	R	II	OR2L13	5'UTR	shelf	5'UTR-shelf	chr1:248100325-248100726	NA	NA		rs74666063
cg13538648	-0.171147	0.676563	-7.93782	5.95245e-14	2.33884e-12	20.6259	0.603956	0.775102	0.171147	7	1225105	F	I		IGR	opensea	IGR-opensea		NA	NA		rs76782767	rs79779727
cg00601648	-0.159514	0.599033	-7.93676	5.99378e-14	2.35303e-12	20.619	0.53136	0.690874	0.159514	8	131974587	R	II	ADCY8	Body	opensea	Body-opensea		NA	TRUE
cg00697301	-0.16363	0.573954	-7.93499	6.06307e-14	2.37635e-12	20.6077	0.504535	0.668165	0.16363	12	19936477	F	I		IGR	opensea	IGR-opensea		NA	NA
cg05988964	-0.162431	0.562764	-7.93429	6.09092e-14	2.38571e-12	20.6032	0.493854	0.656285	0.162431	8	140629559	F	II	KCNK9	3'UTR	shore	3'UTR-shore	chr8:140631096-140631332	NA	NA			rs77134718
cg18647449	-0.161008	0.656009	-7.93267	6.15543e-14	2.40862e-12	20.5928	0.587703	0.748711	0.161008	10	134730222	R	I		IGR	shore	IGR-shore	chr10:134731433-134732013	NA	NA
cg09542210	0.15085	0.393914	7.93082	6.22973e-14	2.43479e-12	20.581	0.457911	0.30706	-0.15085	3	157821536	F	II	SHOX2	Body	island	Body-island	chr3:157821232-157821604	NA	NA
cg11803843	-0.167092	0.788365	-7.93009	6.25943e-14	2.44481e-12	20.5763	0.717478	0.884569	0.167092	10	134834817	R	I		IGR	island	IGR-island	chr10:134834676-134835899	NA	NA
cg17777731	-0.153003	0.643943	-7.92591	6.43165e-14	2.50556e-12	20.5495	0.579033	0.732036	0.153003	6	32976131	R	II	HLA-DOA	Body	shore	Body-shore	chr6:32975684-32975926	NA	NA
cg04579966	0.215192	0.233049	7.92551	6.44834e-14	2.51135e-12	20.547	0.324343	0.109151	-0.215192	13	24846221	R	I	SPATA13	Body	opensea	Body-opensea		TRUE	NA
cg03114253	-0.159275	0.632636	-7.92352	6.53254e-14	2.54102e-12	20.5342	0.565065	0.72434	0.159275	1	158122905	R	II		IGR	shelf	IGR-shelf	chr1:158119488-158119704	NA	NA
cg18064715	-0.156188	0.755116	-7.92317	6.54736e-14	2.54623e-12	20.5319	0.688855	0.845043	0.156188	8	1401404	R	I		IGR	shelf	IGR-shelf	chr8:1404884-1405094	NA	NA
cg08279008	0.178427	0.28448	7.92188	6.60241e-14	2.56598e-12	20.5237	0.360176	0.181749	-0.178427	2	86263224	F	II	POLR1A	Body	opensea	Body-opensea		TRUE	NA
cg02109189	-0.179611	0.730305	-7.92174	6.60837e-14	2.56802e-12	20.5228	0.654106	0.833718	0.179611	13	112611279	R	I		IGR	island	IGR-island	chr13:112610658-112611433	NA	NA
cg21291759	-0.174499	0.69222	-7.92046	6.66344e-14	2.5869e-12	20.5146	0.61819	0.792689	0.174499	1	18406786	F	I		IGR	opensea	IGR-opensea		NA	NA		rs76238899
cg15594444	-0.157907	0.590417	-7.91928	6.71475e-14	2.6047e-12	20.5071	0.523426	0.681333	0.157907	1	59893192	R	II	FGGY	Body	opensea	Body-opensea		NA	TRUE
cg18219713	-0.151774	0.587877	-7.91815	6.76438e-14	2.62271e-12	20.4998	0.523488	0.675262	0.151774	8	50837079	F	II	SNTG1	5'UTR	opensea	5'UTR-opensea		NA	TRUE
cg11100465	-0.168622	0.625024	-7.91747	6.79415e-14	2.63283e-12	20.4955	0.553488	0.72211	0.168622	3	14615134	R	I		IGR	shore	IGR-shore	chr3:14615366-14615957	NA	NA
cg08900316	-0.164084	0.581399	-7.91488	6.90946e-14	2.67436e-12	20.4789	0.511787	0.675871	0.164084	2	46301083	F	II	PRKCE	Body	opensea	Body-opensea		TRUE	TRUE
cg20134355	-0.167404	0.819393	-7.91413	6.94325e-14	2.68628e-12	20.4741	0.748373	0.915776	0.167404	18	44140411	F	I	LOXHD1	TSS1500	island	TSS1500-island	chr18:44140362-44140575	NA	NA
cg15517113	-0.192612	0.696973	-7.91394	6.95168e-14	2.68868e-12	20.4729	0.615259	0.807871	0.192612	2	620265	R	I		IGR	shore	IGR-shore	chr2:620639-621993	NA	NA
cg01271726	-0.179374	0.699507	-7.91317	6.9866e-14	2.70073e-12	20.4679	0.623409	0.802783	0.179374	6	26323586	R	II		IGR	opensea	IGR-opensea		NA	NA
cg02495552	-0.172166	0.55581	-7.91253	7.01573e-14	2.71025e-12	20.4638	0.48277	0.654936	0.172166	12	132221669	R	I	SFRS8	Body	shelf	Body-shelf	chr12:132219327-132219539	TRUE	TRUE
cg13492164	-0.154672	0.690493	-7.91244	7.01981e-14	2.71154e-12	20.4633	0.624874	0.779547	0.154672	14	78709782	R	II		IGR	opensea	IGR-opensea		NA	NA
cg18122501	-0.171239	0.799775	-7.91218	7.03154e-14	2.71549e-12	20.4616	0.727128	0.898367	0.171239	7	157353164	F	I	PTPRN2	Body	island	Body-island	chr7:157352995-157353232	NA	NA
cg24504927	0.206964	0.384188	7.91042	7.11221e-14	2.74311e-12	20.4504	0.471991	0.265027	-0.206964	12	85667353	F	I		IGR	opensea	IGR-opensea		NA	TRUE
cg23205818	-0.189462	0.727402	-7.90971	7.14506e-14	2.7546e-12	20.4458	0.647024	0.836486	0.189462	14	73029132	R	I	RGS6	Body	opensea	Body-opensea		NA	NA
cg23337170	-0.152136	0.787493	-7.90906	7.17517e-14	2.76532e-12	20.4417	0.72295	0.875086	0.152136	14	98012817	R	I		IGR	opensea	IGR-opensea		NA	NA
cg24833737	-0.216663	0.592807	-7.90662	7.28986e-14	2.80623e-12	20.426	0.500889	0.717552	0.216663	8	142632451	F	I		IGR	shore	IGR-shore	chr8:142630127-142630468	NA	NA
cg19851481	-0.151775	0.723754	-7.90394	7.41781e-14	2.85061e-12	20.4089	0.659365	0.81114	0.151775	5	3346821	F	II		IGR	opensea	IGR-opensea		NA	NA
cg17336615	-0.160828	0.65618	-7.90333	7.44714e-14	2.86097e-12	20.405	0.587949	0.748778	0.160828	6	401429	F	II	IRF4	Body	opensea	Body-opensea		NA	NA		rs41301855
cg18646828	-0.152978	0.601389	-7.90264	7.48078e-14	2.87297e-12	20.4006	0.536489	0.689467	0.152978	14	101459547	F	II	SNORD114-31	TSS200	opensea	TSS200-opensea		NA	NA		rs76137386
cg22672716	-0.157776	0.70083	-7.90086	7.5673e-14	2.90249e-12	20.3892	0.633895	0.791671	0.157776	1	4230760	R	II		IGR	opensea	IGR-opensea		NA	NA
cg11784799	-0.20025	0.728223	-7.89986	7.61647e-14	2.91793e-12	20.3828	0.643269	0.843518	0.20025	8	143262091	F	I		IGR	opensea	IGR-opensea		NA	NA
cg22450878	-0.154377	0.687146	-7.89877	7.67068e-14	2.93745e-12	20.3758	0.621653	0.77603	0.154377	5	8843071	R	II		IGR	opensea	IGR-opensea		TRUE	NA
cg13546977	-0.153869	0.710886	-7.89675	7.77189e-14	2.97274e-12	20.3629	0.645608	0.799477	0.153869	14	101198475	R	I	DLK1	Body	shelf	Body-shelf	chr14:101200617-101200929	NA	NA
cg23557906	-0.1713	0.738713	-7.89627	7.79602e-14	2.9806e-12	20.3599	0.66604	0.83734	0.1713	2	467112	F	I		IGR	shore	IGR-shore	chr2:467849-468659	NA	NA		rs2724860
cg25493276	-0.151761	0.478398	-7.89353	7.93563e-14	3.0299e-12	20.3424	0.414015	0.565776	0.151761	5	3855077	F	II		IGR	shore	IGR-shore	chr5:3854536-3854796	NA	NA
cg09291131	-0.214671	0.697698	-7.89259	7.98432e-14	3.04688e-12	20.3363	0.606626	0.821297	0.214671	14	101521809	R	I	MIR453	TSS1500	opensea	TSS1500-opensea		NA	TRUE
cg14557064	-0.176751	0.452546	-7.88982	8.12909e-14	3.09557e-12	20.3186	0.377561	0.554312	0.176751	5	1752840	F	I		IGR	opensea	IGR-opensea		NA	NA		rs75960188
cg09319815	-0.150191	0.826795	-7.88833	8.20772e-14	3.12353e-12	20.3091	0.763077	0.913269	0.150191	2	242794941	R	I	PDCD1	Body	island	Body-island	chr2:242794853-242795083	NA	NA
cg22937607	-0.161124	0.686248	-7.88595	8.33545e-14	3.16713e-12	20.2939	0.617892	0.779016	0.161124	12	108751417	F	I		IGR	opensea	IGR-opensea		NA	TRUE
cg16413687	0.170938	0.407786	7.88346	8.47059e-14	3.21103e-12	20.278	0.480305	0.309367	-0.170938	12	85672623	R	I	ALX1	TSS1500	shore	TSS1500-shore	chr12:85673878-85674700	NA	NA
cg14555045	-0.155075	0.707607	-7.88231	8.53437e-14	3.23317e-12	20.2707	0.641818	0.796893	0.155075	12	128318117	F	I		IGR	opensea	IGR-opensea		NA	NA
cg10643236	-0.157905	0.659402	-7.88137	8.5865e-14	3.25121e-12	20.2646	0.592412	0.750317	0.157905	6	29274727	R	II	OR14J1	1stExon	opensea	1stExon-opensea		NA	NA
cg11074070	-0.164831	0.638147	-7.88078	8.61935e-14	3.26228e-12	20.2609	0.568218	0.733049	0.164831	2	80557293	R	II	CTNNA2	Body	opensea	Body-opensea		NA	TRUE
cg22626683	-0.156127	0.468177	-7.87829	8.75894e-14	3.30886e-12	20.245	0.401942	0.558068	0.156127	1	172903051	R	II		IGR	opensea	IGR-opensea		TRUE	TRUE
cg05023415	-0.170017	0.688193	-7.87657	8.85729e-14	3.34216e-12	20.234	0.616065	0.786082	0.170017	5	15939534	R	II	FBXL7	3'UTR	shelf	3'UTR-shelf	chr5:15936641-15937316	TRUE	TRUE
cg06605454	-0.152701	0.601692	-7.87572	8.90629e-14	3.35889e-12	20.2286	0.53691	0.689611	0.152701	5	2914593	F	II		IGR	opensea	IGR-opensea		NA	NA
cg04837438	-0.213492	0.627111	-7.87332	9.04554e-14	3.40748e-12	20.2133	0.536538	0.75003	0.213492	2	95403063	F	I		IGR	shore	IGR-shore	chr2:95401380-95401636	NA	NA			rs59546686
cg05203206	-0.154908	0.740579	-7.87304	9.06191e-14	3.41282e-12	20.2115	0.67486	0.829768	0.154908	20	5281174	R	II		IGR	shore	IGR-shore	chr20:5282835-5283062	NA	NA
cg19660531	-0.169272	0.724206	-7.87103	9.18074e-14	3.45265e-12	20.1987	0.652394	0.821665	0.169272	12	5937409	R	I	ANO2	Body	shore	Body-shore	chr12:5936876-5937085	NA	TRUE
cg11199751	-0.155442	0.689455	-7.86996	9.24434e-14	3.47353e-12	20.1919	0.62351	0.778952	0.155442	10	132239858	F	II		IGR	opensea	IGR-opensea		NA	NA
cg12821876	-0.175484	0.746499	-7.86995	9.24525e-14	3.47353e-12	20.1918	0.672051	0.847535	0.175484	2	496855	F	I		IGR	island	IGR-island	chr2:496823-497038	NA	NA
cg22740895	-0.173337	0.782735	-7.86924	9.28783e-14	3.48673e-12	20.1873	0.709198	0.882536	0.173337	8	2092745	R	I	MYOM2	Body	opensea	Body-opensea		NA	NA
cg14306344	-0.158899	0.709926	-7.86799	9.36297e-14	3.51165e-12	20.1793	0.642514	0.801413	0.158899	11	1427294	F	I	BRSK2	Body	shelf	Body-shelf	chr11:1430939-1431834	NA	NA
cg14623024	-0.177646	0.605786	-7.86773	9.37854e-14	3.51676e-12	20.1777	0.530421	0.708068	0.177646	8	143206951	F	I		IGR	opensea	IGR-opensea		NA	NA
cg08847614	-0.150833	0.671728	-7.86615	9.47512e-14	3.54854e-12	20.1676	0.607739	0.758571	0.150833	1	4079006	R	II		IGR	opensea	IGR-opensea		NA	NA
cg22434835	-0.150761	0.765998	-7.86556	9.51118e-14	3.55946e-12	20.1638	0.702039	0.852799	0.150761	12	108603985	R	I	WSCD2	Body	opensea	Body-opensea		NA	NA
cg01786382	-0.16572	0.530321	-7.86306	9.66639e-14	3.61155e-12	20.1479	0.460015	0.625735	0.16572	5	3305039	R	II		IGR	shore	IGR-shore	chr5:3305587-3306010	NA	NA
cg08096702	-0.154382	0.717719	-7.85992	9.8646e-14	3.67684e-12	20.1279	0.652223	0.806605	0.154382	15	31358323	R	II	MIR211	TSS1500	opensea	TSS1500-opensea		NA	NA
cg27258050	-0.186063	0.551572	-7.85946	9.89435e-14	3.6864e-12	20.1249	0.472636	0.658699	0.186063	10	134623278	R	I		IGR	shore	IGR-shore	chr10:134624054-134624275	NA	NA
cg04851314	-0.151861	0.735602	-7.85837	9.96397e-14	3.70774e-12	20.118	0.671176	0.823037	0.151861	17	51900106	R	I	KIF2B	TSS200	opensea	TSS200-opensea		NA	NA
cg10636760	-0.179254	0.619317	-7.85609	1.01122e-13	3.75593e-12	20.1034	0.54327	0.722524	0.179254	1	2904595	F	I		IGR	opensea	IGR-opensea		NA	NA		rs58605112
cg05481163	-0.152549	0.594594	-7.85511	1.01759e-13	3.77725e-12	20.0972	0.529876	0.682425	0.152549	10	2756728	R	II		IGR	opensea	IGR-opensea		NA	TRUE
cg22551060	-0.182755	0.81411	-7.85436	1.02259e-13	3.79424e-12	20.0924	0.736577	0.919333	0.182755	8	914346	R	I		IGR	shore	IGR-shore	chr8:914817-915894	NA	NA
cg24176288	-0.163074	0.545105	-7.85171	1.0402e-13	3.85364e-12	20.0756	0.475922	0.638996	0.163074	12	2221304	R	I	CACNA1C	Body	shelf	Body-shelf	chr12:2224409-2224645	NA	TRUE
cg15558061	-0.159555	0.787854	-7.84357	1.09642e-13	4.04405e-12	20.0237	0.720163	0.879719	0.159555	6	58399793	R	I		IGR	opensea	IGR-opensea		NA	NA
cg16400631	0.15765	0.466628	7.84016	1.12082e-13	4.12602e-12	20.002	0.533509	0.37586	-0.15765	1	91300215	R	I		IGR	shore	IGR-shore	chr1:91300979-91301891	NA	TRUE
cg06651505	-0.154717	0.687404	-7.83954	1.12531e-13	4.13916e-12	19.9981	0.621767	0.776483	0.154717	5	166802425	R	I	ODZ2	Body	opensea	Body-opensea		NA	NA
cg17289451	-0.167299	0.685423	-7.83731	1.1416e-13	4.19267e-12	19.9839	0.614448	0.781747	0.167299	13	112908248	F	II		IGR	opensea	IGR-opensea		NA	NA
cg04039397	0.150543	0.487132	7.83682	1.14524e-13	4.20388e-12	19.9808	0.550999	0.400456	-0.150543	3	111260783	F	II	CD96	TSS200	opensea	TSS200-opensea		NA	NA
cg02895126	-0.153917	0.588061	-7.8363	1.14907e-13	4.21665e-12	19.9775	0.522763	0.67668	0.153917	6	159420005	R	II	RSPH3	Body	shore	Body-shore	chr6:159420465-159421293	NA	NA
cg12619165	-0.156473	0.629669	-7.83196	1.18168e-13	4.32402e-12	19.9499	0.563286	0.719759	0.156473	8	126964345	R	II		IGR	opensea	IGR-opensea		NA	NA
cg05167429	-0.162576	0.671554	-7.82964	1.19957e-13	4.38547e-12	19.9351	0.602582	0.765159	0.162576	16	33854086	R	I		IGR	shore	IGR-shore	chr16:33852582-33853710	NA	NA
cg17665357	-0.185272	0.79416	-7.82882	1.2059e-13	4.40636e-12	19.9299	0.715559	0.900831	0.185272	8	2024249	F	I	MYOM2	Body	opensea	Body-opensea		NA	NA		rs3817697
cg13117164	0.152751	0.369272	7.82529	1.2337e-13	4.49928e-12	19.9074	0.434076	0.281325	-0.152751	4	54960232	R	I		IGR	shore	IGR-shore	chr4:54957979-54958542	NA	TRUE
cg18361418	-0.167002	0.474463	-7.82409	1.24322e-13	4.52898e-12	19.8998	0.403614	0.570616	0.167002	6	28499676	F	I	GPX5	Body	opensea	Body-opensea		NA	NA
cg21817287	-0.15941	0.583333	-7.82283	1.25343e-13	4.56294e-12	19.8918	0.515704	0.675114	0.15941	5	40066956	R	II		IGR	opensea	IGR-opensea		NA	NA
cg02112154	-0.169665	0.70631	-7.82252	1.25589e-13	4.57096e-12	19.8899	0.634331	0.803996	0.169665	10	44197967	R	I		IGR	shore	IGR-shore	chr10:44198302-44198577	NA	NA
cg18947995	-0.153061	0.76913	-7.82237	1.25711e-13	4.57449e-12	19.8889	0.704195	0.857257	0.153061	14	101350739	R	I	MIR136	TSS1500	shore	TSS1500-shore	chr14:101349372-101349860	NA	NA
cg02959486	-0.151504	0.63321	-7.82081	1.26982e-13	4.61515e-12	19.879	0.568935	0.720439	0.151504	7	32466775	R	II		IGR	shore	IGR-shore	chr7:32467434-32467948	NA	NA
cg05137386	-0.165984	0.691925	-7.81541	1.3148e-13	4.76278e-12	19.8447	0.621508	0.787492	0.165984	14	105102977	R	I		IGR	shore	IGR-shore	chr14:105103493-105103769	NA	NA
cg02622133	-0.151896	0.539518	-7.81316	1.33397e-13	4.82881e-12	19.8304	0.475077	0.626973	0.151896	16	1061920	R	I		IGR	shore	IGR-shore	chr16:1060490-1060799	NA	NA
cg07121340	-0.150642	0.72979	-7.81089	1.35361e-13	4.89107e-12	19.816	0.665882	0.816524	0.150642	12	2173987	F	II	CACNA1C	Body	opensea	Body-opensea		NA	TRUE
cg16377959	-0.155911	0.724275	-7.8094	1.36668e-13	4.93387e-12	19.8065	0.658131	0.814041	0.155911	5	3511381	R	II		IGR	opensea	IGR-opensea		NA	TRUE
cg07722840	-0.162435	0.791826	-7.80642	1.3932e-13	5.01906e-12	19.7876	0.722915	0.885349	0.162435	7	1460880	R	I		IGR	island	IGR-island	chr7:1460672-1460989	NA	NA
cg06486618	-0.171434	0.758928	-7.8061	1.39609e-13	5.02843e-12	19.7856	0.686199	0.857633	0.171434	19	524262	F	I		IGR	island	IGR-island	chr19:524156-524369	TRUE	NA
cg12597309	-0.155401	0.479983	-7.80049	1.44741e-13	5.19721e-12	19.75	0.414056	0.569456	0.155401	12	124393772	R	II	DNAH10	Body	opensea	Body-opensea		NA	NA
cg09068128	-0.2232	0.702917	-7.79944	1.4572e-13	5.23078e-12	19.7433	0.608226	0.831426	0.2232	5	178781563	F	I		IGR	opensea	IGR-opensea		NA	NA
cg03241571	-0.150424	0.69577	-7.79702	1.48009e-13	5.30872e-12	19.728	0.631954	0.782378	0.150424	17	34822470	R	II		IGR	shore	IGR-shore	chr17:34819844-34820754	NA	NA
cg17125804	-0.152551	0.816375	-7.79698	1.48048e-13	5.30907e-12	19.7277	0.751657	0.904208	0.152551	12	111748346	R	I	CUX2	Body	island	Body-island	chr12:111748178-111748392	NA	NA
cg14492599	-0.187014	0.671162	-7.79541	1.4955e-13	5.3576e-12	19.7178	0.591823	0.778836	0.187014	17	77174290	F	I	HRNBP3	5'UTR	opensea	5'UTR-opensea		NA	NA
cg08520383	-0.165945	0.704357	-7.79434	1.50581e-13	5.39026e-12	19.711	0.633956	0.799901	0.165945	4	12539867	R	II		IGR	opensea	IGR-opensea		NA	NA
cg12917153	-0.163481	0.509084	-7.79285	1.52032e-13	5.43787e-12	19.7015	0.439729	0.60321	0.163481	7	1641705	F	I		IGR	island	IGR-island	chr7:1641704-1641923	NA	NA
cg25669088	-0.154345	0.691592	-7.79234	1.52532e-13	5.45304e-12	19.6983	0.626112	0.780457	0.154345	8	786658	R	I		IGR	shelf	IGR-shelf	chr8:789923-790798	NA	NA
cg00327669	-0.17402	0.803138	-7.79129	1.53567e-13	5.48353e-12	19.6916	0.729312	0.903331	0.17402	5	1950782	F	I		IGR	island	IGR-island	chr5:1950624-1950922	NA	NA
cg24629380	-0.151035	0.591954	-7.79124	1.53617e-13	5.48475e-12	19.6913	0.527879	0.678914	0.151035	1	116214059	R	I	VANGL1	Body	opensea	Body-opensea		NA	TRUE
cg23056713	-0.168282	0.699454	-7.79065	1.54205e-13	5.50414e-12	19.6876	0.628061	0.796344	0.168282	11	131609432	F	I	NTM	Body	opensea	Body-opensea		NA	TRUE			rs34072743
cg05144884	-0.152741	0.634634	-7.78914	1.55702e-13	5.55262e-12	19.678	0.569835	0.722576	0.152741	16	2770429	F	II	PRSS27	1stExon	island	1stExon-island	chr16:2770137-2770500	NA	NA		rs75834536
cg06999799	-0.161443	0.740922	-7.78802	1.56835e-13	5.58529e-12	19.6709	0.672431	0.833873	0.161443	5	1177305	F	I		IGR	opensea	IGR-opensea		NA	NA
cg00386405	-0.150865	0.567083	-7.78527	1.59629e-13	5.67471e-12	19.6535	0.50308	0.653945	0.150865	19	30863275	R	I	ZNF536	TSS200	shelf	TSS200-shelf	chr19:30865683-30866490	NA	NA
cg21966656	-0.168309	0.775629	-7.78513	1.59775e-13	5.67875e-12	19.6526	0.704225	0.872534	0.168309	8	10897405	F	I	XKR6	Body	opensea	Body-opensea		NA	NA
cg04804542	-0.151438	0.486746	-7.78507	1.59839e-13	5.68046e-12	19.6522	0.422499	0.573937	0.151438	17	77175380	F	II	HRNBP3	5'UTR	shelf	5'UTR-shelf	chr17:77178828-77180229	NA	NA
cg14603420	-0.167971	0.764179	-7.78479	1.60118e-13	5.68816e-12	19.6505	0.692919	0.86089	0.167971	8	1359730	R	I		IGR	opensea	IGR-opensea		NA	NA
cg08387538	-0.228204	0.66134	-7.78349	1.61465e-13	5.73199e-12	19.6422	0.564526	0.79273	0.228204	8	1527995	R	I	DLGAP2	Body	opensea	Body-opensea		NA	NA
cg17922326	-0.150296	0.660487	-7.78344	1.6152e-13	5.73287e-12	19.6419	0.596725	0.747021	0.150296	10	1558808	F	II	ADARB2	Body	opensea	Body-opensea		NA	NA
cg06852942	-0.173384	0.740558	-7.78339	1.6157e-13	5.73408e-12	19.6416	0.667001	0.840386	0.173384	5	476497	R	I	SLC9A3	Body	island	Body-island	chr5:476317-476933	NA	NA
cg03326410	-0.154912	0.579404	-7.7755	1.69976e-13	6.00934e-12	19.5916	0.513684	0.668595	0.154912	6	64151739	R	II		IGR	opensea	IGR-opensea		NA	NA	low-CpG:64209691-64209716
cg16772207	-0.153695	0.695149	-7.77471	1.70833e-13	6.03607e-12	19.5866	0.629945	0.78364	0.153695	20	62795807	F	II	MYT1	TSS200	opensea	TSS200-opensea		NA	NA	low-CpG:62266217-62266896	rs76770383
cg06501113	-0.157802	0.584859	-7.77217	1.73647e-13	6.12376e-12	19.5705	0.517913	0.675715	0.157802	6	6534839	F	I	LOC285780	Body	opensea	Body-opensea		NA	NA
cg27297441	-0.18738	0.479675	-7.77216	1.73654e-13	6.12376e-12	19.5705	0.40018	0.587561	0.18738	10	134918671	F	I	GPR123	Body	shore	Body-shore	chr10:134918755-134918975	NA	NA
cg09517873	-0.150363	0.439375	-7.76778	1.78618e-13	6.28529e-12	19.5427	0.375585	0.525948	0.150363	1	12656315	F	I	DHRS3	Body	shore	Body-shore	chr1:12655926-12656248	TRUE	NA
cg24647506	-0.164124	0.727983	-7.76686	1.79667e-13	6.31909e-12	19.537	0.658355	0.822479	0.164124	10	130366835	R	I		IGR	opensea	IGR-opensea		NA	NA
cg16245054	-0.169268	0.800655	-7.76525	1.81538e-13	6.37868e-12	19.5268	0.728845	0.898113	0.169268	12	132698494	F	I	GALNT9	Body	shore	Body-shore	chr12:132696661-132697724	NA	NA		rs73166857
cg27129656	-0.152881	0.69419	-7.76494	1.81897e-13	6.39069e-12	19.5248	0.629331	0.782213	0.152881	14	101840437	F	I		IGR	opensea	IGR-opensea		NA	NA		rs77081885
cg06482220	-0.157305	0.626752	-7.76391	1.8311e-13	6.43017e-12	19.5183	0.560017	0.717322	0.157305	5	3823385	F	II		IGR	opensea	IGR-opensea		NA	NA
cg12593431	-0.156355	0.632482	-7.76254	1.84719e-13	6.48226e-12	19.5096	0.56615	0.722505	0.156355	13	112240754	F	I		IGR	shore	IGR-shore	chr13:112238672-112238893	NA	NA
cg13390867	0.155532	0.55425	7.76022	1.87491e-13	6.56865e-12	19.495	0.620233	0.464702	-0.155532	9	86717438	R	I		IGR	opensea	IGR-opensea		NA	NA
cg02456218	-0.152069	0.659285	-7.75969	1.8813e-13	6.58913e-12	19.4916	0.594771	0.74684	0.152069	5	180476573	F	I	BTNL9	Body	shelf	Body-shelf	chr5:180479585-180480959	NA	NA
cg04106390	-0.158535	0.692091	-7.75958	1.88271e-13	6.59342e-12	19.4909	0.624833	0.783369	0.158535	16	1224897	R	I	CACNA1H	Body	shelf	Body-shelf	chr16:1227260-1227476	TRUE	TRUE
cg26010877	-0.190186	0.724462	-7.75885	1.89152e-13	6.62107e-12	19.4863	0.643777	0.833963	0.190186	10	131213990	F	I		IGR	opensea	IGR-opensea		NA	NA		rs76660250
cg19518426	-0.15871	0.539662	-7.75846	1.89625e-13	6.63527e-12	19.4838	0.47233	0.631041	0.15871	5	2866779	F	II		IGR	island	IGR-island	chr5:2866699-2867005	NA	NA		rs74734560
cg11349423	-0.182687	0.76624	-7.75651	1.9201e-13	6.71067e-12	19.4715	0.688736	0.871423	0.182687	11	133232657	F	I	OPCML	Body	shore	Body-shore	chr11:133230884-133231645	NA	NA
cg20458740	-0.165632	0.792852	-7.75534	1.93457e-13	6.75717e-12	19.4641	0.722584	0.888215	0.165632	7	63652783	R	I		IGR	island	IGR-island	chr7:63652630-63652962	NA	NA
cg05943574	-0.173222	0.5987	-7.75095	1.98976e-13	6.93063e-12	19.4364	0.525212	0.698434	0.173222	1	248685382	R	I	OR2G6	1stExon	opensea	1stExon-opensea		NA	NA
cg16452248	-0.165754	0.70894	-7.74793	2.02871e-13	7.05542e-12	19.4173	0.63862	0.804375	0.165754	16	613526	F	I	C16orf11	Body	shore	Body-shore	chr16:614792-615095	NA	NA
cg24452128	0.172232	0.487329	7.74466	2.07163e-13	7.18455e-12	19.3966	0.560397	0.388165	-0.172232	6	10390919	R	I		IGR	island	IGR-island	chr6:10390888-10391098	NA	TRUE
cg13707623	-0.151252	0.746301	-7.74212	2.10568e-13	7.29212e-12	19.3806	0.682134	0.833386	0.151252	20	57766574	F	I	ZNF831	1stExon	island	1stExon-island	chr20:57766396-57767896	NA	NA
cg27000831	-0.152706	0.539876	-7.74181	2.10992e-13	7.30468e-12	19.3786	0.475091	0.627797	0.152706	17	32645748	F	II	CCL8	TSS1500	opensea	TSS1500-opensea		NA	NA
cg01280841	0.158367	0.432711	7.7397	2.13857e-13	7.39748e-12	19.3653	0.499897	0.34153	-0.158367	7	100181701	R	II	LRCH4	Body	shore	Body-shore	chr7:100183527-100184625	NA	TRUE
cg10677372	-0.167802	0.817769	-7.73939	2.1429e-13	7.41073e-12	19.3633	0.746581	0.914383	0.167802	7	154003270	R	I	DPP6	Body	shore	Body-shore	chr7:154001964-154002281	NA	NA
cg10244594	-0.176241	0.683994	-7.73786	2.16397e-13	7.47601e-12	19.3537	0.609226	0.785466	0.176241	12	13376594	R	I		IGR	opensea	IGR-opensea		TRUE	TRUE
cg26402417	-0.182772	0.450011	-7.73696	2.1765e-13	7.51355e-12	19.348	0.372471	0.555243	0.182772	11	94841384	F	I	ENDOD1	Body	opensea	Body-opensea		TRUE	TRUE			rs76121051
cg00282510	0.150816	0.447365	7.7364	2.18426e-13	7.53744e-12	19.3445	0.511348	0.360532	-0.150816	9	100611516	F	II		IGR	island	IGR-island	chr9:100610696-100611517	NA	NA
cg15167871	-0.207172	0.685064	-7.7285	2.29762e-13	7.8856e-12	19.2946	0.597173	0.804345	0.207172	10	132891371	F	I	TCERG1L	3'UTR	shelf	3'UTR-shelf	chr10:132893428-132893688	NA	NA
cg23081534	-0.181021	0.761929	-7.72837	2.29956e-13	7.89075e-12	19.2938	0.685132	0.866153	0.181021	3	169540079	F	I	LRRIQ4	1stExon	opensea	1stExon-opensea		NA	NA
cg23433118	-0.174799	0.801509	-7.7268	2.32276e-13	7.96429e-12	19.2839	0.727352	0.902152	0.174799	12	133017800	F	I		IGR	shore	IGR-shore	chr12:133018850-133019141	NA	NA
cg25075794	0.153214	0.429281	7.72242	2.38881e-13	8.16671e-12	19.2563	0.494281	0.341067	-0.153214	7	30951392	R	II	AQP1	TSS200	opensea	TSS200-opensea		NA	NA
cg04696181	-0.203491	0.715234	-7.72124	2.40683e-13	8.22049e-12	19.2489	0.628904	0.832395	0.203491	5	3386790	F	I		IGR	opensea	IGR-opensea		NA	NA		rs76378508
cg05705018	-0.160414	0.668804	-7.71211	2.55165e-13	8.66505e-12	19.1913	0.60075	0.761164	0.160414	11	133232497	R	I	OPCML	Body	shore	Body-shore	chr11:133230884-133231645	NA	NA
cg03180404	-0.155354	0.728849	-7.70737	2.63009e-13	8.91044e-12	19.1615	0.662942	0.818296	0.155354	11	126907483	F	II		IGR	opensea	IGR-opensea		NA	TRUE
cg26864905	-0.205021	0.586893	-7.70593	2.65441e-13	8.98608e-12	19.1524	0.499915	0.704935	0.205021	6	137366369	R	I	IL20RA	TSS200	shore	TSS200-shore	chr6:137365299-137366126	NA	NA
cg02448597	0.165384	0.393562	7.70283	2.70748e-13	9.14171e-12	19.1329	0.463725	0.298341	-0.165384	6	32160605	F	II	GPSM3	5'UTR	shelf	5'UTR-shelf	chr6:32163292-32164383	NA	NA	low-CpG:32268390-32268693
cg03296575	-0.151509	0.69424	-7.70252	2.71285e-13	9.15726e-12	19.131	0.629963	0.781472	0.151509	16	3211656	R	II		IGR	shelf	IGR-shelf	chr16:3207597-3209413	NA	NA
cg17491339	-0.154244	0.598122	-7.70227	2.71719e-13	9.17019e-12	19.1294	0.532686	0.686929	0.154244	2	980050	F	II	SNTG2	Body	opensea	Body-opensea		NA	TRUE		rs11890062
cg08399733	-0.155879	0.803808	-7.70206	2.72086e-13	9.18174e-12	19.1281	0.737678	0.893557	0.155879	19	2278773	R	I	C19orf35	Body	island	Body-island	chr19:2278605-2278848	NA	NA
cg10175249	-0.169273	0.770734	-7.70078	2.74317e-13	9.25355e-12	19.12	0.698921	0.868194	0.169273	10	130546259	R	I		IGR	opensea	IGR-opensea		NA	NA
cg15963070	-0.159023	0.612831	-7.70068	2.74497e-13	9.25615e-12	19.1194	0.545366	0.704389	0.159023	2	80341377	F	II	CTNNA2	Body	opensea	Body-opensea		NA	TRUE
cg24795748	-0.154573	0.731228	-7.70055	2.74721e-13	9.26109e-12	19.1186	0.665652	0.820225	0.154573	21	47404165	F	I	COL6A1	Body	island	Body-island	chr21:47404108-47404312	NA	NA
cg14147184	-0.151878	0.544445	-7.70038	2.75013e-13	9.27008e-12	19.1175	0.480012	0.631889	0.151878	9	137997399	R	I	OLFM1	Body	island	Body-island	chr9:137997370-137997588	NA	NA			rs76033076
cg17033333	-0.208543	0.655048	-7.70001	2.75664e-13	9.28943e-12	19.1152	0.566575	0.775118	0.208543	5	2261042	R	I		IGR	opensea	IGR-opensea		NA	NA
cg13782905	-0.167739	0.764164	-7.69627	2.82328e-13	9.48474e-12	19.0917	0.693002	0.860741	0.167739	9	141016367	F	I	CACNA1B	Body	shore	Body-shore	chr9:141014643-141014870	NA	NA
cg21648009	-0.162837	0.709533	-7.69447	2.85594e-13	9.58194e-12	19.0803	0.640451	0.803288	0.162837	17	77175465	F	II	HRNBP3	5'UTR	shelf	5'UTR-shelf	chr17:77178828-77180229	NA	NA		rs72856460
cg15043113	-0.1653	0.539003	-7.6942	2.86089e-13	9.59646e-12	19.0786	0.468876	0.634176	0.1653	5	3790687	R	II		IGR	opensea	IGR-opensea		NA	TRUE
cg20375320	-0.161067	0.645651	-7.69046	2.93003e-13	9.80864e-12	19.0551	0.577319	0.738386	0.161067	12	2420738	F	I	CACNA1C	Body	opensea	Body-opensea		TRUE	TRUE
cg26923862	-0.187914	0.760572	-7.68558	3.02278e-13	1.00798e-11	19.0244	0.680851	0.868764	0.187914	16	1041256	R	I		IGR	island	IGR-island	chr16:1040965-1041365	NA	NA
cg23219336	-0.150709	0.631018	-7.6833	3.06695e-13	1.02101e-11	19.0101	0.567081	0.717789	0.150709	1	153175262	R	II	LELP1	TSS1500	opensea	TSS1500-opensea		NA	NA
cg25981920	-0.152711	0.683216	-7.68222	3.0881e-13	1.02713e-11	19.0033	0.618429	0.77114	0.152711	8	144203483	F	II		IGR	opensea	IGR-opensea		NA	NA
cg21757970	-0.175352	0.636196	-7.68153	3.10175e-13	1.03117e-11	18.999	0.561805	0.737157	0.175352	5	4867543	F	I		IGR	shore	IGR-shore	chr5:4866317-4866630	NA	NA		rs73738516
cg16919708	-0.163454	0.451209	-7.68029	3.12634e-13	1.03855e-11	18.9912	0.381865	0.545319	0.163454	11	133023150	F	I	OPCML	Body	opensea	Body-opensea		NA	NA
cg12886862	-0.184685	0.728756	-7.67992	3.13376e-13	1.04037e-11	18.9889	0.650405	0.83509	0.184685	10	2487150	F	I		IGR	opensea	IGR-opensea		NA	NA		rs76320229
cg05896377	-0.158111	0.619662	-7.67987	3.13483e-13	1.04063e-11	18.9885	0.552585	0.710696	0.158111	7	3920297	R	II	SDK1	Body	opensea	Body-opensea		NA	NA
cg05671385	0.172353	0.296486	7.67854	3.1616e-13	1.04855e-11	18.9802	0.369606	0.197252	-0.172353	11	104915759	F	II	CASP1	Body	opensea	Body-opensea		NA	NA
cg06411129	-0.17398	0.765513	-7.67784	3.17567e-13	1.05302e-11	18.9758	0.691703	0.865684	0.17398	12	132695392	R	I	GALNT9	Body	shore	Body-shore	chr12:132696661-132697724	NA	NA
cg17102042	-0.151766	0.715057	-7.67764	3.17977e-13	1.05428e-11	18.9745	0.650671	0.802437	0.151766	7	157423211	F	II	PTPRN2	Body	opensea	Body-opensea		NA	NA
cg01736164	-0.213856	0.635042	-7.67676	3.19766e-13	1.05943e-11	18.969	0.544315	0.758171	0.213856	14	97924317	F	I		IGR	opensea	IGR-opensea		NA	TRUE
cg05136737	-0.161377	0.666093	-7.67489	3.23587e-13	1.07042e-11	18.9573	0.597631	0.759007	0.161377	1	244924918	R	II		IGR	opensea	IGR-opensea		NA	NA
cg06316219	-0.177553	0.80558	-7.67028	3.33238e-13	1.09787e-11	18.9283	0.730254	0.907807	0.177553	1	2834040	R	I		IGR	opensea	IGR-opensea		NA	NA
cg17703048	-0.163385	0.787173	-7.67019	3.33428e-13	1.09824e-11	18.9278	0.717858	0.881243	0.163385	11	133852993	R	I		IGR	opensea	IGR-opensea		NA	NA
cg16121641	-0.156301	0.670826	-7.66945	3.35018e-13	1.10328e-11	18.9231	0.604516	0.760817	0.156301	7	37705587	F	II		IGR	opensea	IGR-opensea		NA	TRUE
cg08721876	-0.160308	0.676289	-7.6667	3.40937e-13	1.12113e-11	18.9058	0.60828	0.768588	0.160308	5	4116507	F	II		IGR	opensea	IGR-opensea		NA	NA
cg16402270	-0.150454	0.763115	-7.66619	3.4203e-13	1.12411e-11	18.9027	0.699287	0.84974	0.150454	10	133274184	R	I		IGR	opensea	IGR-opensea		NA	NA
cg22912497	-0.159655	0.770294	-7.65931	3.5737e-13	1.16947e-11	18.8595	0.702561	0.862216	0.159655	19	38974117	F	I	RYR1	Body	island	Body-island	chr19:38973939-38974156	NA	NA
cg10268509	-0.180536	0.637606	-7.65872	3.58698e-13	1.17322e-11	18.8558	0.561015	0.741552	0.180536	16	89120300	R	I		IGR	shore	IGR-shore	chr16:89118801-89119152	NA	NA
cg17906803	-0.15292	0.698311	-7.65566	3.65764e-13	1.19373e-11	18.8366	0.633436	0.786356	0.15292	1	19587393	F	II		IGR	opensea	IGR-opensea		TRUE	TRUE
cg13056990	-0.181339	0.582931	-7.65068	3.77538e-13	1.2286e-11	18.8054	0.505999	0.687338	0.181339	1	4736099	R	I	AJAP1	Body	opensea	Body-opensea		NA	NA
cg19509988	-0.152637	0.577627	-7.64958	3.8018e-13	1.23619e-11	18.7985	0.512872	0.665509	0.152637	7	157460657	F	II	PTPRN2	Body	opensea	Body-opensea		NA	NA
cg02866152	-0.151711	0.583265	-7.64947	3.80453e-13	1.23686e-11	18.7978	0.518902	0.670613	0.151711	20	62795846	F	II	MYT1	5'UTR	opensea	5'UTR-opensea		NA	NA	low-CpG:62266217-62266896
cg22539356	-0.172581	0.714198	-7.64919	3.8114e-13	1.2388e-11	18.7961	0.640982	0.813563	0.172581	15	87667434	R	I		IGR	opensea	IGR-opensea		NA	NA		rs74028915
cg10810394	-0.160638	0.51228	-7.64869	3.82351e-13	1.24247e-11	18.7929	0.44413	0.604769	0.160638	19	12886980	F	I	HOOK2	TSS1500	shore	TSS1500-shore	chr19:12885756-12886519	NA	NA
cg08699646	0.182508	0.391298	7.64676	3.87058e-13	1.25544e-11	18.7809	0.468726	0.286218	-0.182508	16	58019359	F	I	TEPP	Body	island	Body-island	chr16:58018400-58019471	TRUE	TRUE		rs9934227
cg09364122	-0.154487	0.712587	-7.64673	3.87152e-13	1.25558e-11	18.7806	0.647048	0.801534	0.154487	1	942198	R	I		IGR	opensea	IGR-opensea		TRUE	NA
cg14802502	-0.212363	0.58725	-7.64565	3.89817e-13	1.26331e-11	18.7739	0.497156	0.709519	0.212363	5	2338616	F	I		IGR	opensea	IGR-opensea		NA	NA
cg02044349	-0.157832	0.82745	-7.64555	3.90052e-13	1.26396e-11	18.7733	0.760491	0.918323	0.157832	13	112902015	F	I		IGR	opensea	IGR-opensea		NA	NA			rs77336046
cg19132462	-0.15073	0.480518	-7.64451	3.9264e-13	1.27155e-11	18.7668	0.416572	0.567302	0.15073	11	10476608	R	II	AMPD3	TSS200	shelf	TSS200-shelf	chr11:10472000-10472857	TRUE	NA
cg27310093	-0.154502	0.728453	-7.64406	3.93771e-13	1.27475e-11	18.7639	0.662907	0.817408	0.154502	6	55010127	R	II		IGR	opensea	IGR-opensea		NA	TRUE
cg19088635	-0.157157	0.724689	-7.64135	4.00619e-13	1.29379e-11	18.747	0.658016	0.815173	0.157157	13	114065008	F	I		IGR	shore	IGR-shore	chr13:114066946-114067488	TRUE	TRUE		rs10571731
cg15008984	-0.15125	0.534264	-7.63939	4.05646e-13	1.30867e-11	18.7347	0.470097	0.621347	0.15125	7	142568715	F	II	EPHB6	3'UTR	opensea	3'UTR-opensea		NA	NA		rs67853558
cg27391921	-0.157069	0.662674	-7.63921	4.06116e-13	1.30989e-11	18.7335	0.596039	0.753108	0.157069	17	31340794	R	II	ACCN1	3'UTR	opensea	3'UTR-opensea		NA	NA
cg08456666	-0.151527	0.793161	-7.63805	4.09119e-13	1.31864e-11	18.7263	0.728877	0.880404	0.151527	16	87647531	F	I	JPH3	Body	shore	Body-shore	chr16:87648086-87648688	NA	NA
cg26869615	-0.153115	0.688248	-7.63727	4.1113e-13	1.32417e-11	18.7215	0.62329	0.776406	0.153115	11	20044639	R	II	NAV2	Body	opensea	Body-opensea		NA	NA
cg10682299	0.153909	0.479398	7.63509	4.16866e-13	1.34109e-11	18.7078	0.544693	0.390784	-0.153909	4	111550154	R	II	PITX2	Body	island	Body-island	chr4:111549879-111550203	NA	TRUE
cg14574910	-0.20586	0.782912	-7.6348	4.17652e-13	1.34326e-11	18.706	0.695577	0.901438	0.20586	5	2155809	F	I		IGR	opensea	IGR-opensea		NA	NA
cg01520122	-0.171452	0.64387	-7.63458	4.18229e-13	1.34487e-11	18.7046	0.571132	0.742585	0.171452	17	32595801	F	II	CCL7	TSS1500	opensea	TSS1500-opensea		NA	NA		rs36231836
cg11951974	-0.169135	0.756058	-7.63391	4.20017e-13	1.34954e-11	18.7004	0.684303	0.853438	0.169135	4	8608486	R	I	CPZ	Body	opensea	Body-opensea		NA	NA
cg04930921	-0.158552	0.728751	-7.63318	4.21979e-13	1.35475e-11	18.6958	0.661487	0.820038	0.158552	4	3447796	F	I	HGFAC	Body	shore	Body-shore	chr4:3449650-3449995	NA	NA
cg16135695	-0.174083	0.729406	-7.62946	4.32055e-13	1.38316e-11	18.6726	0.655553	0.829636	0.174083	10	1889970	R	I		IGR	opensea	IGR-opensea		NA	NA
cg12702981	0.179865	0.477277	7.62839	4.3501e-13	1.39102e-11	18.6659	0.553584	0.373719	-0.179865	3	119528656	R	I	NR1I2	Body	shore	Body-shore	chr3:119528920-119529159	NA	NA
cg14464551	-0.192554	0.74134	-7.62651	4.40221e-13	1.40581e-11	18.6541	0.65965	0.852205	0.192554	10	130828619	F	I		IGR	opensea	IGR-opensea		NA	NA
cg18805469	-0.150872	0.565085	-7.62554	4.42955e-13	1.41366e-11	18.648	0.501078	0.651951	0.150872	1	152944810	F	II	SPRR4	3'UTR	opensea	3'UTR-opensea		NA	NA
cg18155853	-0.200043	0.739002	-7.62464	4.45496e-13	1.42077e-11	18.6424	0.654135	0.854178	0.200043	3	169540504	R	I	LRRIQ4	1stExon	opensea	1stExon-opensea		NA	NA
cg22514112	-0.210199	0.706219	-7.62219	4.52459e-13	1.44093e-11	18.6271	0.617044	0.827243	0.210199	5	1859764	F	I		IGR	shore	IGR-shore	chr5:1856773-1858444	NA	NA		rs4975704
cg11354603	-0.182994	0.563674	-7.62079	4.56512e-13	1.45256e-11	18.6183	0.48604	0.669034	0.182994	5	4230769	F	I		IGR	opensea	IGR-opensea		NA	TRUE
cg21936464	-0.154256	0.640012	-7.61699	4.67663e-13	1.48476e-11	18.5946	0.57457	0.728826	0.154256	1	153177032	F	II	LELP1	5'UTR	opensea	5'UTR-opensea		NA	NA		rs5016436
cg02936263	-0.154122	0.627263	-7.61656	4.68933e-13	1.48803e-11	18.5919	0.561878	0.716	0.154122	17	32596886	F	II	CCL7	TSS1500	opensea	TSS1500-opensea		NA	NA		rs3091319	rs36231513
cg24390913	0.152101	0.382356	7.61382	4.77146e-13	1.51035e-11	18.5748	0.446884	0.294783	-0.152101	10	118899788	F	I		IGR	island	IGR-island	chr10:118899247-118900329	NA	NA
cg06126225	-0.169512	0.727987	-7.61	4.88867e-13	1.54311e-11	18.5509	0.656073	0.825585	0.169512	12	128318160	R	I		IGR	opensea	IGR-opensea		NA	NA
cg11006960	-0.16293	0.591829	-7.60929	4.91056e-13	1.54894e-11	18.5465	0.522708	0.685637	0.16293	5	3180918	R	II		IGR	opensea	IGR-opensea		NA	TRUE
cg06457736	-0.152141	0.413271	-7.60638	5.00205e-13	1.57422e-11	18.5283	0.348727	0.500867	0.152141	3	11178683	F	II	HRH1	TSS200	opensea	TSS200-opensea		NA	TRUE		rs11707701
cg02913918	-0.160227	0.663281	-7.6049	5.04913e-13	1.58751e-11	18.5191	0.595306	0.755533	0.160227	1	181767609	F	II	CACNA1E	Body	island	Body-island	chr1:181767493-181767893	NA	NA
cg21063722	0.177328	0.544482	7.60413	5.07377e-13	1.59442e-11	18.5143	0.619712	0.442385	-0.177328	6	100911709	F	I	SIM1	TSS200	shore	TSS200-shore	chr6:100912071-100913337	TRUE	TRUE			rs80193484
cg03691144	-0.151989	0.768321	-7.59379	5.41752e-13	1.69197e-11	18.4498	0.703841	0.855829	0.151989	13	112238872	F	I		IGR	island	IGR-island	chr13:112238672-112238893	NA	NA
cg11658970	-0.153619	0.652874	-7.59052	5.53092e-13	1.7253e-11	18.4294	0.587702	0.741321	0.153619	6	159734674	R	I		IGR	shelf	IGR-shelf	chr6:159736690-159736973	NA	NA
cg14715697	-0.241359	0.621899	-7.58909	5.58116e-13	1.73931e-11	18.4204	0.519504	0.760863	0.241359	17	77127487	F	I	HRNBP3	5'UTR	island	5'UTR-island	chr17:77127405-77127606	NA	NA
cg27046920	-0.176265	0.797906	-7.58622	5.68344e-13	1.76815e-11	18.4026	0.723127	0.899392	0.176265	5	538702	F	I		IGR	shore	IGR-shore	chr5:537303-537522	NA	NA
cg19740859	-0.170832	0.705954	-7.58592	5.69442e-13	1.77094e-11	18.4007	0.63348	0.804312	0.170832	2	2193641	R	I	MYT1L	5'UTR	island	5'UTR-island	chr2:2193510-2193716	NA	NA
cg01507200	-0.15318	0.650841	-7.58353	5.78097e-13	1.79568e-11	18.3858	0.585856	0.739036	0.15318	1	247877066	R	II	OR6F1	TSS1500	opensea	TSS1500-opensea		NA	NA
cg15244965	-0.16597	0.617427	-7.57791	5.99015e-13	1.85236e-11	18.3508	0.547015	0.712986	0.16597	8	3429480	F	I	CSMD1	Body	opensea	Body-opensea		NA	NA		rs73658201
cg22471075	-0.184578	0.518325	-7.5735	6.15953e-13	1.90034e-11	18.3234	0.440019	0.624597	0.184578	22	49765229	F	I		IGR	island	IGR-island	chr22:49764995-49765272	NA	NA
cg01972576	-0.178307	0.65875	-7.56948	6.31823e-13	1.94497e-11	18.2983	0.583105	0.761412	0.178307	8	143916273	R	I	GML	5'UTR	island	5'UTR-island	chr8:143916135-143916405	NA	NA			rs66944369
cg01703246	-0.170277	0.685695	-7.56814	6.37207e-13	1.96071e-11	18.29	0.613456	0.783733	0.170277	8	2127431	F	I		IGR	shelf	IGR-shelf	chr8:2129863-2130356	NA	NA
cg09729500	-0.150097	0.715967	-7.56319	6.57453e-13	2.01784e-11	18.2592	0.65229	0.802387	0.150097	10	2932386	F	I		IGR	island	IGR-island	chr10:2932075-2932447	NA	NA
cg05887869	-0.165472	0.558975	-7.56189	6.62872e-13	2.03256e-11	18.2511	0.488775	0.654247	0.165472	5	9738648	R	II	LOC285692	Body	opensea	Body-opensea		NA	TRUE
cg26338723	-0.161085	0.765073	-7.56051	6.68683e-13	2.04847e-11	18.2425	0.696734	0.857819	0.161085	10	117884983	R	I	GFRA1	Body	island	Body-island	chr10:117884813-117885029	NA	NA		rs77406058
cg16898334	-0.151753	0.722048	-7.55543	6.90494e-13	2.10844e-11	18.2109	0.657668	0.809421	0.151753	1	181767774	F	II	CACNA1E	Body	island	Body-island	chr1:181767493-181767893	NA	NA		rs35105143
cg13035743	0.155132	0.590406	7.5549	6.92791e-13	2.11441e-11	18.2076	0.65622	0.501088	-0.155132	6	32119685	R	II	PRRT1	1stExon	shore	1stExon-shore	chr6:32118101-32118544	NA	TRUE	high-CpG:32227661-32227701
cg08184936	-0.16492	0.80648	-7.55472	6.93563e-13	2.11641e-11	18.2065	0.736514	0.901434	0.16492	11	50219952	F	I		IGR	opensea	IGR-opensea		NA	NA
cg24495585	0.178449	0.470915	7.55316	7.00461e-13	2.13583e-11	18.1968	0.54662	0.368171	-0.178449	4	56659985	F	I		IGR	island	IGR-island	chr4:56659626-56660144	NA	NA
cg07281377	-0.168209	0.793275	-7.55198	7.05697e-13	2.15016e-11	18.1894	0.721914	0.890123	0.168209	16	1113891	F	I		IGR	shore	IGR-shore	chr16:1115827-1116468	NA	NA		rs74001147
cg02394701	-0.172157	0.594543	-7.55153	7.07689e-13	2.1555e-11	18.1867	0.521507	0.693664	0.172157	7	49560538	R	II		IGR	opensea	IGR-opensea		NA	TRUE
cg25370753	-0.190099	0.69897	-7.5492	7.18187e-13	2.18453e-11	18.1722	0.618322	0.808421	0.190099	1	181767736	F	I	CACNA1E	Body	island	Body-island	chr1:181767493-181767893	NA	NA		rs35105143
cg00124045	-0.153024	0.668669	-7.54887	7.19659e-13	2.18771e-11	18.1702	0.60375	0.756774	0.153024	10	134735893	F	I		IGR	shore	IGR-shore	chr10:134735972-134736254	NA	NA		rs11146039
cg07057191	-0.167206	0.711042	-7.54819	7.22773e-13	2.19593e-11	18.1659	0.640106	0.807312	0.167206	11	125200198	R	I	PKNOX2	5'UTR	opensea	5'UTR-opensea		NA	NA
cg16674248	-0.160755	0.529215	-7.54768	7.25106e-13	2.20186e-11	18.1627	0.461016	0.621771	0.160755	22	46664402	F	I	TTC38	Body	shore	Body-shore	chr22:46663605-46664126	NA	TRUE		rs9627359
cg15559674	0.151156	0.452664	7.54492	7.37832e-13	2.23617e-11	18.1456	0.51679	0.365634	-0.151156	6	149803426	R	II	ZC3H12D	5'UTR	opensea	5'UTR-opensea		NA	NA
cg26014281	-0.165732	0.616038	-7.54456	7.39504e-13	2.24029e-11	18.1434	0.545728	0.71146	0.165732	7	157227226	F	II		IGR	opensea	IGR-opensea		NA	NA		rs9632535
cg05165559	-0.151471	0.578481	-7.54381	7.43035e-13	2.24967e-11	18.1387	0.51422	0.665692	0.151471	20	62037758	F	II	KCNQ2	3'UTR	shore	3'UTR-shore	chr20:62037929-62038677	NA	NA
cg17928147	0.161706	0.418117	7.54299	7.46846e-13	2.25979e-11	18.1336	0.486719	0.325014	-0.161706	19	13125281	R	I	NFIX	Body	shore	Body-shore	chr19:13120986-13124368	TRUE	TRUE
cg01095157	-0.157896	0.635735	-7.54197	7.51686e-13	2.27261e-11	18.1273	0.568749	0.726644	0.157896	2	171784674	R	II	GORASP2	TSS1500	shore	TSS1500-shore	chr2:171785474-171786399	NA	NA
cg08023442	-0.151918	0.628059	-7.54191	7.51954e-13	2.27304e-11	18.1269	0.563609	0.715527	0.151918	3	34767621	F	II		IGR	opensea	IGR-opensea		NA	TRUE		rs75934276
cg08655148	-0.158422	0.743211	-7.54151	7.53868e-13	2.27826e-11	18.1244	0.676002	0.834424	0.158422	1	22915653	F	I	EPHA8	Body	opensea	Body-opensea		NA	NA		rs56044578
cg11757040	-0.157669	0.617866	-7.53827	7.6941e-13	2.32133e-11	18.1043	0.550976	0.708645	0.157669	14	73209188	F	I	DPF3	Body	opensea	Body-opensea		NA	TRUE		rs73302114
cg24135583	-0.178044	0.682023	-7.53684	7.76414e-13	2.33914e-11	18.0954	0.60649	0.784533	0.178044	7	157353191	F	I	PTPRN2	Body	island	Body-island	chr7:157352995-157353232	NA	NA
cg26986989	-0.151689	0.393022	-7.5361	7.80038e-13	2.34927e-11	18.0908	0.328669	0.480358	0.151689	5	2338998	R	II		IGR	opensea	IGR-opensea		NA	NA
cg13402298	-0.152006	0.734424	-7.53591	7.80942e-13	2.35151e-11	18.0897	0.669937	0.821942	0.152006	1	2850682	R	II		IGR	island	IGR-island	chr1:2850665-2850873	NA	NA
cg12979234	-0.154303	0.601623	-7.53416	7.89613e-13	2.37493e-11	18.0788	0.536162	0.690464	0.154303	7	44083518	F	II	DBNL	TSS1500	shore	TSS1500-shore	chr7:44084106-44084747	NA	NA
cg19284767	-0.150702	0.731592	-7.53191	8.00902e-13	2.40568e-11	18.0648	0.667658	0.818359	0.150702	2	466735	R	II		IGR	shore	IGR-shore	chr2:467849-468659	NA	NA
cg10009968	-0.193448	0.75881	-7.53044	8.08363e-13	2.42506e-11	18.0557	0.676741	0.870189	0.193448	7	3033408	R	I	CARD11	5'UTR	opensea	5'UTR-opensea		NA	NA
cg02489094	-0.1502	0.63042	-7.52894	8.16032e-13	2.44562e-11	18.0464	0.566698	0.716898	0.1502	7	132172336	F	II	PLXNA4	Body	opensea	Body-opensea		NA	NA		rs156927	rs76970952
cg14541582	-0.166295	0.59068	-7.52863	8.17652e-13	2.44946e-11	18.0445	0.520131	0.686426	0.166295	5	601475	F	I		IGR	shore	IGR-shore	chr5:602124-602553	NA	NA		rs3749615
cg12629448	-0.159389	0.752136	-7.52751	8.23406e-13	2.46506e-11	18.0376	0.684517	0.843906	0.159389	1	152733025	F	I	KPRP	Body	island	Body-island	chr1:152732958-152733338	NA	NA
cg26938676	-0.151278	0.534236	-7.52661	8.28118e-13	2.47731e-11	18.032	0.470058	0.621336	0.151278	14	73204126	F	II	DPF3	Body	opensea	Body-opensea		NA	TRUE
cg23988801	-0.185811	0.679737	-7.52502	8.36446e-13	2.50015e-11	18.0221	0.600908	0.786719	0.185811	5	3768181	R	I		IGR	opensea	IGR-opensea		NA	NA		rs76863248
cg19997179	-0.163107	0.776631	-7.52301	8.47065e-13	2.52874e-11	18.0097	0.707434	0.870541	0.163107	2	620310	F	I		IGR	shore	IGR-shore	chr2:620639-621993	NA	NA
cg02892357	-0.161474	0.59968	-7.52266	8.48973e-13	2.53402e-11	18.0075	0.531176	0.69265	0.161474	21	45789379	R	I	TRPM2	Body	shore	Body-shore	chr21:45789090-45789373	TRUE	TRUE			rs67883505
cg23363930	-0.173445	0.686192	-7.52031	8.61588e-13	2.56785e-11	17.9929	0.61261	0.786055	0.173445	5	4116560	R	II		IGR	opensea	IGR-opensea		NA	NA
cg14533651	-0.151124	0.775548	-7.51823	8.7298e-13	2.59708e-11	17.98	0.711435	0.862558	0.151124	12	13715927	F	I	GRIN2B	Body	island	Body-island	chr12:13715849-13717034	NA	NA		rs1805246
cg26065488	0.161519	0.483033	7.51694	8.80093e-13	2.61651e-11	17.972	0.551556	0.390037	-0.161519	3	171176016	F	II	TNIK	Body	shore	Body-shore	chr3:171177829-171178964	NA	NA		rs1565568
cg13831106	-0.172033	0.705883	-7.51557	8.87713e-13	2.63721e-11	17.9635	0.632899	0.804932	0.172033	2	2119853	F	I	MYT1L	5'UTR	opensea	5'UTR-opensea		NA	NA
cg14968543	0.160956	0.362309	7.51402	8.96411e-13	2.66042e-11	17.9539	0.430593	0.269637	-0.160956	8	99986964	R	II		IGR	island	IGR-island	chr8:99985733-99986983	NA	NA
cg15866393	-0.150586	0.569043	-7.51311	9.01555e-13	2.67354e-11	17.9483	0.505158	0.655743	0.150586	12	132900480	R	I	GALNT9	Body	island	Body-island	chr12:132900224-132901089	NA	NA
cg04844231	-0.156665	0.636047	-7.51291	9.02719e-13	2.67627e-11	17.947	0.569583	0.726248	0.156665	8	85711159	R	II	RALYL	Body	opensea	Body-opensea		NA	NA
cg02192678	-0.153058	0.511532	-7.51117	9.12611e-13	2.70182e-11	17.9363	0.446598	0.599656	0.153058	8	1495185	R	I	DLGAP2	5'UTR	island	5'UTR-island	chr8:1495105-1495333	NA	NA
cg07810282	-0.180011	0.761001	-7.51048	9.16609e-13	2.71254e-11	17.932	0.684632	0.864643	0.180011	10	133058601	R	I	TCERG1L	Body	island	Body-island	chr10:133058338-133058609	NA	NA
cg03248767	-0.173523	0.765922	-7.50882	9.26201e-13	2.73733e-11	17.9218	0.692306	0.865829	0.173523	17	9676174	R	I	DHRS7C	Body	shore	Body-shore	chr17:9674854-9675265	NA	NA
cg14032033	-0.15689	0.659523	-7.50594	9.43174e-13	2.78384e-11	17.9039	0.592964	0.749854	0.15689	1	241371615	F	II	RGS7	Body	opensea	Body-opensea		NA	TRUE		rs10926432
cg22764535	-0.160772	0.666341	-7.50367	9.56729e-13	2.8197e-11	17.8898	0.598134	0.758906	0.160772	2	242833494	R	II		IGR	shore	IGR-shore	chr2:242832999-242833229	NA	TRUE
cg15328241	-0.150863	0.670718	-7.50236	9.64632e-13	2.84183e-11	17.8817	0.606715	0.757578	0.150863	2	80547585	F	II	CTNNA2	Body	shore	Body-shore	chr2:80549578-80549798	NA	NA
cg10888111	-0.1834	0.758526	-7.50198	9.66957e-13	2.84798e-11	17.8794	0.68072	0.86412	0.1834	2	1637068	R	I	PXDN	3'UTR	opensea	3'UTR-opensea		NA	TRUE
cg16679007	-0.154144	0.55184	-7.50192	9.67274e-13	2.84845e-11	17.879	0.486445	0.64059	0.154144	5	15551384	R	II	FBXL7	Body	opensea	Body-opensea		NA	TRUE
cg15912086	-0.167942	0.723402	-7.50168	9.68784e-13	2.85173e-11	17.8775	0.652154	0.820096	0.167942	12	128318241	F	I		IGR	opensea	IGR-opensea		NA	NA
cg18202928	-0.164792	0.560306	-7.50154	9.6963e-13	2.85375e-11	17.8767	0.490394	0.655186	0.164792	5	15692835	R	II	FBXL7	Body	opensea	Body-opensea		NA	TRUE
cg27369096	-0.170573	0.795249	-7.49998	9.79143e-13	2.8787e-11	17.867	0.722884	0.893457	0.170573	5	2169769	F	I		IGR	opensea	IGR-opensea		NA	NA
cg16772023	-0.162335	0.733655	-7.49933	9.83143e-13	2.88905e-11	17.863	0.664785	0.827121	0.162335	10	1308866	F	I	ADARB2	Body	opensea	Body-opensea		NA	NA		rs59841331
cg07949720	-0.173436	0.843299	-7.49776	9.92938e-13	2.91379e-11	17.8533	0.76972	0.943156	0.173436	13	112856747	R	I		IGR	opensea	IGR-opensea		NA	NA
cg01439568	-0.150567	0.627624	-7.49191	1.0301e-12	3.01229e-11	17.8171	0.563747	0.714314	0.150567	3	51429919	R	I	RBM15B	1stExon	shore	1stExon-shore	chr3:51430384-51430737	NA	NA
cg19707128	-0.179131	0.731499	-7.48963	1.04492e-12	3.05193e-11	17.803	0.655504	0.834635	0.179131	2	127635279	R	I		IGR	opensea	IGR-opensea		NA	NA
cg09192940	-0.189087	0.620204	-7.48909	1.04852e-12	3.06169e-11	17.7997	0.539985	0.729072	0.189087	16	318694	R	I	RGS11	3'UTR	island	3'UTR-island	chr16:318617-318901	NA	NA
cg26371345	0.152636	0.285366	7.48809	1.05508e-12	3.0786e-11	17.7935	0.350121	0.197485	-0.152636	6	44090748	R	II	MRPL14	5'UTR	shelf	5'UTR-shelf	chr6:44094708-44096134	NA	TRUE
cg26550235	0.173728	0.406545	7.48738	1.05979e-12	3.09035e-11	17.7891	0.480247	0.30652	-0.173728	1	19277202	F	II	IFFO2	Body	opensea	Body-opensea		NA	NA
cg19741167	0.161927	0.324736	7.48429	1.08056e-12	3.14658e-11	17.77	0.393432	0.231505	-0.161927	2	86263270	R	II	POLR1A	Body	opensea	Body-opensea		TRUE	NA
cg23864180	-0.199436	0.617042	-7.47986	1.11107e-12	3.22918e-11	17.7426	0.532432	0.731868	0.199436	10	1256353	R	I	ADARB2	Body	shelf	Body-shelf	chr10:1252141-1252505	NA	NA
cg22377166	-0.15917	0.75912	-7.47898	1.11719e-12	3.24433e-11	17.7372	0.691593	0.850763	0.15917	1	166765935	R	I		IGR	opensea	IGR-opensea		NA	NA		rs487934
cg21041775	0.171106	0.368086	7.47604	1.13799e-12	3.29863e-11	17.7191	0.440676	0.26957	-0.171106	12	54425418	F	I	HOXC4	5'UTR	shore	5'UTR-shore	chr12:54427025-54428709	TRUE	NA
cg04641474	-0.176015	0.772098	-7.47587	1.13922e-12	3.30112e-11	17.718	0.697425	0.87344	0.176015	5	1864666	R	I		IGR	opensea	IGR-opensea		NA	NA
cg11311032	-0.155329	0.742095	-7.47307	1.15937e-12	3.3528e-11	17.7007	0.676198	0.831527	0.155329	6	83268113	R	II		IGR	opensea	IGR-opensea		NA	NA	low-CpG:83324832-83324834
cg04542290	-0.154677	0.708819	-7.47145	1.17126e-12	3.3839e-11	17.6907	0.643199	0.797876	0.154677	5	5033782	F	II	LOC340094	TSS1500	opensea	TSS1500-opensea		NA	NA
cg26654519	-0.15017	0.557633	-7.47024	1.18015e-12	3.40631e-11	17.6833	0.493925	0.644094	0.15017	8	142517494	R	II	FLJ43860	TSS200	opensea	TSS200-opensea		TRUE	NA
cg03547078	-0.161232	0.604308	-7.46882	1.19074e-12	3.43415e-11	17.6745	0.535907	0.697139	0.161232	1	1855303	R	I		IGR	shelf	IGR-shelf	chr1:1859246-1859523	NA	NA
cg13927088	-0.157797	0.557586	-7.46861	1.19228e-12	3.43805e-11	17.6732	0.490641	0.648438	0.157797	1	152691125	R	II	C1orf68	TSS1500	opensea	TSS1500-opensea		NA	NA
cg24704396	-0.156016	0.736882	-7.46539	1.21661e-12	3.50063e-11	17.6533	0.670694	0.826709	0.156016	10	134617238	R	I		IGR	shelf	IGR-shelf	chr10:134621072-134621372	NA	NA
cg12913587	-0.151108	0.686442	-7.46494	1.22005e-12	3.50885e-11	17.6505	0.622336	0.773444	0.151108	5	1232923	R	I	SLC6A18	Body	shore	Body-shore	chr5:1232352-1232594	NA	NA
cg10692363	-0.161799	0.680403	-7.46155	1.24624e-12	3.57676e-11	17.6296	0.611761	0.77356	0.161799	10	80327890	F	I		IGR	opensea	IGR-opensea		NA	TRUE
cg10150530	0.175674	0.395834	7.45992	1.25904e-12	3.60918e-11	17.6196	0.470363	0.294688	-0.175674	12	25205468	F	II	LRMP	1stExon	opensea	1stExon-opensea		NA	NA	low-CpG:25096707-25096795
cg25000021	-0.168071	0.699229	-7.45816	1.27298e-12	3.64423e-11	17.6087	0.627926	0.795997	0.168071	2	2735969	F	I		IGR	opensea	IGR-opensea		NA	NA
cg19813015	-0.172591	0.824237	-7.45809	1.2735e-12	3.64484e-11	17.6083	0.751016	0.923607	0.172591	14	104896001	F	I		IGR	island	IGR-island	chr14:104895904-104897609	NA	NA
cg00428193	-0.153533	0.803101	-7.4561	1.28947e-12	3.68528e-11	17.5961	0.737966	0.891498	0.153533	19	57335015	R	I	PEG3	Body	opensea	Body-opensea		NA	NA
cg00531137	0.154414	0.397086	7.45561	1.29346e-12	3.6952e-11	17.593	0.462595	0.308181	-0.154414	16	57643932	F	II		IGR	opensea	IGR-opensea		NA	TRUE		rs11865370
cg09763347	-0.156493	0.637917	-7.45479	1.30016e-12	3.71228e-11	17.588	0.571526	0.72802	0.156493	8	133574010	F	II	HPYR1	TSS1500	opensea	TSS1500-opensea		NA	NA
cg06434454	-0.188784	0.655873	-7.45437	1.30355e-12	3.72138e-11	17.5854	0.575783	0.764567	0.188784	5	5146320	R	I	ADAMTS16	Body	opensea	Body-opensea		NA	NA
cg20384387	-0.214843	0.766249	-7.45394	1.30706e-12	3.73024e-11	17.5827	0.675103	0.889946	0.214843	8	143217692	F	I		IGR	opensea	IGR-opensea		NA	NA
cg08725319	-0.168221	0.783677	-7.45301	1.31466e-12	3.74903e-11	17.577	0.712311	0.880532	0.168221	7	157334751	R	I	PTPRN2	Body	opensea	Body-opensea		NA	NA
cg16301599	-0.168219	0.80224	-7.44542	1.3787e-12	3.91699e-11	17.5302	0.730875	0.899093	0.168219	17	77206389	R	I	HRNBP3	5'UTR	opensea	5'UTR-opensea		NA	NA
cg27664085	-0.157599	0.416924	-7.44529	1.37981e-12	3.91983e-11	17.5294	0.350064	0.507663	0.157599	15	89157815	F	I		IGR	opensea	IGR-opensea		TRUE	NA
cg13248778	0.192769	0.400431	7.44508	1.38157e-12	3.92454e-11	17.5282	0.482212	0.289442	-0.192769	7	128337725	F	I		IGR	opensea	IGR-opensea		TRUE	NA
cg09349604	0.165531	0.408838	7.44444	1.38712e-12	3.93861e-11	17.5242	0.479063	0.313532	-0.165531	4	41880747	F	II		IGR	shore	IGR-shore	chr4:41881177-41881418	NA	NA
cg26842802	0.158587	0.351313	7.44409	1.39021e-12	3.94629e-11	17.522	0.418592	0.260005	-0.158587	2	202125212	R	II	CASP8	5'UTR	opensea	5'UTR-opensea		NA	NA
cg12600174	0.165288	0.497928	7.444	1.391e-12	3.94758e-11	17.5215	0.568051	0.402763	-0.165288	7	27205230	F	I	HOXA9	TSS200	island	TSS200-island	chr7:27203915-27206462	TRUE	NA
cg00230837	-0.154242	0.553266	-7.44385	1.3923e-12	3.95066e-11	17.5206	0.48783	0.642072	0.154242	5	9714909	F	II	LOC285692	Body	opensea	Body-opensea		NA	TRUE
cg23349726	-0.157756	0.674064	-7.43782	1.44582e-12	4.0874e-11	17.4834	0.607137	0.764894	0.157756	2	21320297	R	II		IGR	opensea	IGR-opensea		NA	TRUE
cg26233084	-0.159156	0.490117	-7.43689	1.45424e-12	4.10831e-11	17.4777	0.422596	0.581753	0.159156	5	15510258	F	II	FBXL7	Body	opensea	Body-opensea		NA	TRUE
cg01371233	-0.186173	0.689246	-7.43327	1.48747e-12	4.19331e-11	17.4555	0.610263	0.796436	0.186173	16	30456325	F	II	SEPHS2	1stExon	shore	1stExon-shore	chr16:30456730-30457071	NA	NA
cg13449257	-0.151576	0.568626	-7.4319	1.50032e-12	4.22556e-11	17.447	0.504321	0.655897	0.151576	9	137355128	R	I		IGR	shore	IGR-shore	chr9:137356381-137358802	NA	NA
cg24113266	-0.154384	0.811793	-7.43123	1.50655e-12	4.24112e-11	17.443	0.746297	0.900681	0.154384	7	98122011	F	I		IGR	opensea	IGR-opensea		NA	NA
cg19872222	-0.152372	0.617939	-7.42852	1.53233e-12	4.3056e-11	17.4263	0.553296	0.705668	0.152372	12	115843552	F	II		IGR	opensea	IGR-opensea		NA	TRUE		rs7975091
cg10589396	-0.191963	0.733936	-7.42761	1.5411e-12	4.32522e-11	17.4206	0.652497	0.84446	0.191963	10	132891341	F	I	TCERG1L	3'UTR	shelf	3'UTR-shelf	chr10:132893428-132893688	NA	NA
cg24098131	-0.161811	0.777893	-7.42532	1.56331e-12	4.38209e-11	17.4066	0.709246	0.871057	0.161811	10	130844121	F	I		IGR	opensea	IGR-opensea		NA	NA
cg13387854	-0.15285	0.560615	-7.4253	1.56343e-12	4.38209e-11	17.4065	0.495769	0.648619	0.15285	5	2225323	F	II		IGR	opensea	IGR-opensea		NA	NA
cg23498518	-0.187632	0.64425	-7.42432	1.57305e-12	4.40632e-11	17.4005	0.564649	0.752281	0.187632	7	53104336	F	I	POM121L12	3'UTR	shore	3'UTR-shore	chr7:53103275-53103801	NA	NA
cg22511877	-0.199476	0.675993	-7.42424	1.57385e-12	4.40822e-11	17.4	0.591367	0.790843	0.199476	2	1942942	F	I	MYT1L	Body	shore	Body-shore	chr2:1941068-1941560	NA	NA		rs7565890
cg12942932	-0.15346	0.690095	-7.42393	1.57685e-12	4.41387e-11	17.3981	0.624991	0.778451	0.15346	2	881987	F	II		IGR	opensea	IGR-opensea		NA	NA
cg04214938	-0.161662	0.489634	-7.41961	1.62e-12	4.51886e-11	17.3715	0.42105	0.582712	0.161662	2	119496171	F	I		IGR	opensea	IGR-opensea		TRUE	TRUE
cg21726372	0.152617	0.467278	7.41835	1.63276e-12	4.55116e-11	17.3638	0.532024	0.379407	-0.152617	4	111540884	F	I	PITX2	Body	shore	Body-shore	chr4:111542062-111544464	NA	NA
cg19787694	-0.160155	0.602186	-7.41722	1.64433e-12	4.58001e-11	17.3568	0.534242	0.694397	0.160155	19	846117	R	I	PRTN3	Body	island	Body-island	chr19:846011-846435	NA	NA
cg19370451	-0.15939	0.673786	-7.41595	1.65746e-12	4.60996e-11	17.349	0.606166	0.765556	0.15939	1	152386561	F	II	CRNN	5'UTR	opensea	5'UTR-opensea		NA	NA
cg10538533	-0.158066	0.673598	-7.4145	1.67248e-12	4.64585e-11	17.3401	0.606539	0.764605	0.158066	12	53074328	F	II	KRT1	TSS200	opensea	TSS200-opensea		NA	NA
cg19021412	-0.187216	0.589442	-7.41254	1.69316e-12	4.69857e-11	17.3281	0.510017	0.697233	0.187216	5	2103257	R	I		IGR	opensea	IGR-opensea		NA	NA
cg10875499	-0.171748	0.744138	-7.40968	1.7236e-12	4.77716e-11	17.3105	0.671275	0.843023	0.171748	7	1428900	F	I		IGR	opensea	IGR-opensea		NA	NA		rs80096876
cg08364970	-0.186894	0.729191	-7.40774	1.74458e-12	4.82901e-11	17.2986	0.649902	0.836796	0.186894	16	88476144	R	I		IGR	opensea	IGR-opensea		TRUE	NA
cg18833880	-0.169484	0.817077	-7.4075	1.74719e-12	4.83512e-11	17.2971	0.745174	0.914659	0.169484	10	131650741	R	I	EBF3	Body	opensea	Body-opensea		NA	NA
cg25866634	-0.152117	0.754124	-7.40748	1.74746e-12	4.83549e-11	17.297	0.689589	0.841707	0.152117	10	131641580	F	I	EBF3	Body	shelf	Body-shelf	chr10:131638564-131638840	NA	NA
cg18744355	-0.181013	0.63809	-7.40724	1.75005e-12	4.8423e-11	17.2955	0.561296	0.742309	0.181013	2	1906949	R	I	MYT1L	Body	opensea	Body-opensea		NA	NA			rs79671489
cg18791991	-0.159532	0.717118	-7.40692	1.75354e-12	4.85083e-11	17.2936	0.649438	0.80897	0.159532	12	133056941	F	I		IGR	island	IGR-island	chr12:133056769-133057105	NA	NA
cg07354506	0.153186	0.253717	7.40346	1.79175e-12	4.94515e-11	17.2724	0.318705	0.165519	-0.153186	5	139048148	R	II	CXXC5	5'UTR	island	5'UTR-island	chr5:139047905-139048235	NA	TRUE
cg18282849	0.167668	0.34933	7.40186	1.80975e-12	4.98946e-11	17.2625	0.420462	0.252793	-0.167668	11	86085694	F	I	CCDC81	TSS200	island	TSS200-island	chr11:86085693-86086006	NA	TRUE		rs56300487
cg05672569	-0.192921	0.679966	-7.40006	1.83014e-12	5.03874e-11	17.2515	0.598121	0.791042	0.192921	7	157332545	R	I	PTPRN2	3'UTR	opensea	3'UTR-opensea		NA	NA
cg06271630	-0.160473	0.749859	-7.39962	1.83515e-12	5.05063e-11	17.2488	0.68178	0.842252	0.160473	10	3329765	R	II		IGR	opensea	IGR-opensea		NA	NA
cg19575753	-0.15793	0.566063	-7.3979	1.85493e-12	5.09729e-11	17.2383	0.499062	0.656992	0.15793	5	1948995	R	II		IGR	island	IGR-island	chr5:1948994-1949227	NA	NA
cg08822417	-0.182551	0.680658	-7.39767	1.85757e-12	5.10415e-11	17.2369	0.603212	0.785763	0.182551	10	1669312	F	I	ADARB2	Body	opensea	Body-opensea		NA	NA		rs17294019	rs77280241
cg00627045	-0.153071	0.749915	-7.39576	1.87984e-12	5.15787e-11	17.2251	0.684976	0.838047	0.153071	17	11461244	F	I	SHISA6	Body	island	Body-island	chr17:11461071-11461437	NA	NA
cg08219814	-0.153381	0.79975	-7.39392	1.90156e-12	5.21467e-11	17.2138	0.734679	0.888061	0.153381	8	1327367	F	I		IGR	island	IGR-island	chr8:1327331-1327547	NA	NA
cg02724025	-0.151927	0.808072	-7.39069	1.94014e-12	5.314e-11	17.1941	0.743619	0.895546	0.151927	16	64984700	R	I	CDH11	Body	island	Body-island	chr16:64984681-64984908	NA	NA
cg22457668	-0.18446	0.712178	-7.39025	1.9455e-12	5.32747e-11	17.1914	0.633922	0.818382	0.18446	8	1318052	R	I		IGR	shelf	IGR-shelf	chr8:1321232-1321638	NA	NA
cg19495969	-0.162175	0.658151	-7.38864	1.9651e-12	5.37626e-11	17.1815	0.58935	0.751525	0.162175	11	126443490	F	I	KIRREL3	Body	opensea	Body-opensea		NA	TRUE
cg14520280	-0.155607	0.703193	-7.3885	1.96687e-12	5.38027e-11	17.1806	0.637177	0.792785	0.155607	1	242767727	F	II		IGR	opensea	IGR-opensea		NA	NA		rs4658835
cg05813818	-0.159896	0.681903	-7.38639	1.99285e-12	5.44433e-11	17.1677	0.614068	0.773964	0.159896	16	875966	R	I		IGR	shore	IGR-shore	chr16:874280-874895	NA	NA
cg19457237	-0.171446	0.679643	-7.3846	2.01521e-12	5.49791e-11	17.1567	0.606908	0.778354	0.171446	12	34500585	F	I		IGR	island	IGR-island	chr12:34500550-34500814	NA	NA		rs12369042
cg11902424	-0.154945	0.551703	-7.38432	2.01868e-12	5.50612e-11	17.155	0.485969	0.640914	0.154945	5	2252995	F	II		IGR	opensea	IGR-opensea		NA	NA			rs35145328
cg18093771	-0.161436	0.631085	-7.38378	2.02553e-12	5.52204e-11	17.1517	0.562597	0.724033	0.161436	10	1256339	R	I	ADARB2	Body	shelf	Body-shelf	chr10:1252141-1252505	NA	NA
cg19671331	-0.151304	0.745325	-7.37974	2.07707e-12	5.65001e-11	17.127	0.681136	0.832439	0.151304	8	143509438	R	I		IGR	island	IGR-island	chr8:143509372-143509630	NA	NA
cg14197503	-0.160737	0.54509	-7.37963	2.07847e-12	5.65296e-11	17.1263	0.476898	0.637636	0.160737	10	2777072	F	I		IGR	opensea	IGR-opensea		NA	NA
cg14644941	-0.158553	0.772298	-7.3757	2.12995e-12	5.77511e-11	17.1022	0.705033	0.863586	0.158553	7	62859227	F	I	LOC100287834	Body	shore	Body-shore	chr7:62858468-62858826	NA	NA
cg27097992	-0.191409	0.72766	-7.37327	2.16235e-12	5.8502e-11	17.0874	0.646456	0.837865	0.191409	14	104800950	R	I		IGR	island	IGR-island	chr14:104800444-104800977	NA	NA		rs76732330
cg22453826	-0.157093	0.647655	-7.37142	2.18743e-12	5.91094e-11	17.0761	0.58101	0.738103	0.157093	6	169399683	F	I		IGR	opensea	IGR-opensea		NA	NA
cg25628701	-0.173759	0.663378	-7.37119	2.19055e-12	5.91849e-11	17.0747	0.589662	0.763421	0.173759	5	178835943	F	I		IGR	opensea	IGR-opensea		NA	NA		rs688178
cg02965283	-0.156147	0.643604	-7.37043	2.20089e-12	5.94286e-11	17.07	0.57736	0.733507	0.156147	2	39952015	F	II		IGR	opensea	IGR-opensea		NA	TRUE		rs2716724
cg27344430	-0.174899	0.788439	-7.36917	2.2182e-12	5.98377e-11	17.0623	0.71424	0.889138	0.174899	5	41587931	F	I		IGR	opensea	IGR-opensea		NA	NA
cg25516542	-0.150074	0.547034	-7.36668	2.25279e-12	6.06936e-11	17.0471	0.483366	0.633441	0.150074	5	2141773	R	II		IGR	opensea	IGR-opensea		NA	NA
cg07623037	-0.170802	0.730819	-7.3648	2.27934e-12	6.13492e-11	17.0356	0.658358	0.829159	0.170802	5	2704354	R	I		IGR	opensea	IGR-opensea		NA	NA
cg13355574	-0.194308	0.770427	-7.35945	2.35634e-12	6.32605e-11	17.0029	0.687993	0.882301	0.194308	10	134729942	F	I		IGR	island	IGR-island	chr10:134729798-134730022	NA	NA
cg21449256	-0.170826	0.793146	-7.35571	2.41176e-12	6.45712e-11	16.98	0.720674	0.8915	0.170826	8	1336144	R	I		IGR	opensea	IGR-opensea		NA	NA
cg19247310	-0.152869	0.609061	-7.35515	2.42014e-12	6.47668e-11	16.9766	0.544208	0.697077	0.152869	11	59132298	R	II	OR5AN1	1stExon	opensea	1stExon-opensea		NA	NA
cg04727521	-0.16631	0.64395	-7.3549	2.4239e-12	6.48576e-11	16.9751	0.573394	0.739704	0.16631	16	1154951	F	I		IGR	island	IGR-island	chr16:1154940-1155319	NA	NA
cg26068160	-0.170763	0.668137	-7.35306	2.4517e-12	6.55336e-11	16.9639	0.595692	0.766455	0.170763	13	112895546	R	II		IGR	island	IGR-island	chr13:112895427-112895708	NA	NA
cg09642857	-0.156061	0.636147	-7.35202	2.46756e-12	6.59183e-11	16.9575	0.569939	0.726001	0.156061	12	133026813	F	I		IGR	shelf	IGR-shelf	chr12:133022649-133022863	NA	NA
cg05694761	-0.152622	0.731983	-7.35191	2.46926e-12	6.59394e-11	16.9568	0.667234	0.819857	0.152622	16	11922606	R	II	BCAR4	Body	opensea	Body-opensea		NA	NA
cg14106234	-0.17062	0.625688	-7.3517	2.47247e-12	6.60165e-11	16.9556	0.553303	0.723924	0.17062	10	3805326	F	I		IGR	opensea	IGR-opensea		NA	NA
cg23214628	-0.152795	0.53701	-7.351	2.48327e-12	6.6279e-11	16.9513	0.472187	0.624983	0.152795	7	75989305	F	I	YWHAG	TSS1500	shore	TSS1500-shore	chr7:75987606-75988977	NA	NA
cg19664328	-0.1638	0.651857	-7.35051	2.49078e-12	6.64698e-11	16.9483	0.582366	0.746166	0.1638	5	178854502	F	I		IGR	opensea	IGR-opensea		NA	NA		rs77545820
cg20555674	0.160379	0.501683	7.35037	2.49299e-12	6.65175e-11	16.9474	0.569723	0.409344	-0.160379	17	37321631	R	II	ARL5C	Body	island	Body-island	chr17:37321482-37322099	NA	NA
cg08700893	-0.180367	0.741031	-7.34978	2.5021e-12	6.67323e-11	16.9438	0.664512	0.844879	0.180367	2	875896	R	I		IGR	opensea	IGR-opensea		NA	NA
cg21661864	-0.165833	0.760634	-7.34943	2.50754e-12	6.68675e-11	16.9417	0.69028	0.856113	0.165833	2	240599807	F	I		IGR	opensea	IGR-opensea		NA	NA
cg08040429	-0.169897	0.822147	-7.34604	2.56091e-12	6.81343e-11	16.921	0.750069	0.919966	0.169897	22	48027764	R	I		IGR	island	IGR-island	chr22:48027586-48027828	NA	NA
cg16091055	-0.150638	0.781721	-7.3451	2.57591e-12	6.85182e-11	16.9152	0.717814	0.868452	0.150638	14	25736583	R	I		IGR	opensea	IGR-opensea		NA	NA
cg11901695	-0.15872	0.746137	-7.3384	2.68518e-12	7.11153e-11	16.8744	0.678801	0.837521	0.15872	2	1291450	R	I	SNTG2	Body	opensea	Body-opensea		NA	NA
cg18751133	-0.15862	0.54274	-7.33746	2.70095e-12	7.15013e-11	16.8686	0.475447	0.634067	0.15862	6	99842351	F	I	COQ3	TSS1500	shore	TSS1500-shore	chr6:99841661-99842146	NA	NA
cg06502570	-0.190726	0.69569	-7.33722	2.70492e-12	7.15972e-11	16.8672	0.614776	0.805502	0.190726	20	59832924	R	I	CDH4	Body	shelf	Body-shelf	chr20:59826977-59828978	NA	NA
cg24351427	-0.150255	0.667846	-7.33318	2.77345e-12	7.32486e-11	16.8426	0.604101	0.754356	0.150255	1	185670109	R	II		IGR	opensea	IGR-opensea		NA	TRUE
cg15262505	-0.15718	0.612315	-7.33148	2.80298e-12	7.39256e-11	16.8321	0.545633	0.702812	0.15718	7	1428806	R	I		IGR	opensea	IGR-opensea		NA	NA
cg23168425	-0.180574	0.579317	-7.3306	2.81826e-12	7.42796e-11	16.8268	0.50271	0.683284	0.180574	7	157561848	F	I	PTPRN2	Body	shore	Body-shore	chr7:157560974-157561195	NA	NA		rs75511357
cg27243490	-0.158043	0.674523	-7.3303	2.82355e-12	7.44136e-11	16.8249	0.607474	0.765517	0.158043	2	1204826	F	I	SNTG2	Body	opensea	Body-opensea		NA	NA
cg03013917	-0.180447	0.718907	-7.32891	2.84791e-12	7.49899e-11	16.8165	0.642354	0.822801	0.180447	10	77021867	F	I		IGR	opensea	IGR-opensea		NA	NA
cg07083862	-0.153552	0.595517	-7.32845	2.85607e-12	7.51773e-11	16.8137	0.530374	0.683926	0.153552	2	1417248	F	II	TPO	1stExon	opensea	1stExon-opensea		NA	NA		rs28909986
cg02493524	-0.150473	0.618382	-7.32385	2.9386e-12	7.71694e-11	16.7857	0.554545	0.705018	0.150473	5	3768103	R	II		IGR	opensea	IGR-opensea		NA	NA
cg27272853	-0.197201	0.660429	-7.32343	2.94628e-12	7.73428e-11	16.7831	0.576768	0.773969	0.197201	16	891260	R	I		IGR	shelf	IGR-shelf	chr16:894644-895057	NA	NA
cg10236778	-0.150609	0.709698	-7.32144	2.9828e-12	7.81875e-11	16.771	0.645803	0.796412	0.150609	2	858127	F	I		IGR	opensea	IGR-opensea		NA	NA		rs4274632
cg23040685	-0.155188	0.659309	-7.32085	2.99371e-12	7.84509e-11	16.7674	0.593472	0.74866	0.155188	2	1093532	R	I	SNTG2	Body	opensea	Body-opensea		NA	NA
cg22263031	-0.169606	0.716949	-7.31866	3.0346e-12	7.93954e-11	16.754	0.644995	0.814601	0.169606	15	97323948	F	I		IGR	opensea	IGR-opensea		NA	NA		rs73464922
cg24751154	-0.222565	0.682472	-7.30963	3.20886e-12	8.35422e-11	16.6991	0.58805	0.810616	0.222565	5	3191887	R	I		IGR	shelf	IGR-shelf	chr5:3188099-3188375	NA	NA
cg17975443	0.150032	0.432288	7.30639	3.27391e-12	8.50149e-11	16.6794	0.495938	0.345907	-0.150032	17	59534998	R	II	TBX4	Body	island	Body-island	chr17:59531723-59535254	NA	TRUE		rs3744447
cg07838495	-0.152482	0.756422	-7.30352	3.33252e-12	8.63873e-11	16.6619	0.691732	0.844214	0.152482	17	8287763	R	I	RPL26	TSS1500	shore	TSS1500-shore	chr17:8286376-8287336	NA	TRUE
cg12937133	-0.159364	0.696536	-7.30257	3.35209e-12	8.68248e-11	16.6562	0.628927	0.788291	0.159364	4	3825672	F	I		IGR	opensea	IGR-opensea		NA	NA
cg05626376	-0.16992	0.633778	-7.29889	3.42928e-12	8.86218e-11	16.6338	0.561691	0.731611	0.16992	6	31938847	F	I	STK19	TSS200	shore	TSS200-shore	chr6:31939730-31940559	NA	NA		rs35529997
cg26238975	-0.19144	0.61973	-7.29869	3.43353e-12	8.87252e-11	16.6326	0.538513	0.729953	0.19144	14	101520662	F	I	MIR134	TSS1500	opensea	TSS1500-opensea		NA	NA
cg27416863	-0.208093	0.694736	-7.29192	3.58024e-12	9.21925e-11	16.5914	0.606454	0.814548	0.208093	7	1370727	F	I		IGR	island	IGR-island	chr7:1370386-1370863	NA	NA		rs6971183
cg14384303	-0.150919	0.703967	-7.29109	3.59853e-12	9.25974e-11	16.5864	0.639941	0.79086	0.150919	9	137186686	R	I		IGR	opensea	IGR-opensea		NA	TRUE
cg15790037	0.180557	0.30333	7.28857	3.65508e-12	9.38648e-11	16.5711	0.37993	0.199372	-0.180557	17	37321490	F	I	ARL5C	Body	island	Body-island	chr17:37321482-37322099	NA	NA		rs520054
cg23523659	-0.150249	0.82223	-7.28835	3.65988e-12	9.39747e-11	16.5698	0.758487	0.908737	0.150249	10	2125911	R	I		IGR	opensea	IGR-opensea		NA	NA
cg16783478	-0.186236	0.772192	-7.28817	3.66412e-12	9.40569e-11	16.5687	0.693182	0.879419	0.186236	16	9943657	R	I	GRIN2A	Body	opensea	Body-opensea		NA	NA
cg06172942	0.152203	0.318403	7.28724	3.68521e-12	9.45511e-11	16.563	0.382974	0.230771	-0.152203	3	50378529	F	II	RASSF1	TSS200	island	TSS200-island	chr3:50377803-50378540	TRUE	NA
cg10178270	-0.183193	0.780048	-7.28094	3.83122e-12	9.78307e-11	16.5248	0.702329	0.885523	0.183193	2	1913552	F	I	MYT1L	Body	opensea	Body-opensea		NA	NA
cg20707230	-0.187903	0.709137	-7.279	3.8774e-12	9.88841e-11	16.513	0.62942	0.817324	0.187903	5	1950701	F	I		IGR	island	IGR-island	chr5:1950624-1950922	NA	NA		rs6863595
cg15003570	-0.163243	0.745543	-7.2784	3.89177e-12	9.92222e-11	16.5094	0.676288	0.839531	0.163243	10	133529939	R	I		IGR	opensea	IGR-opensea		NA	NA
cg09959150	-0.150613	0.774581	-7.27641	3.93976e-12	1.00361e-10	16.4973	0.710684	0.861298	0.150613	8	709624	R	I		IGR	opensea	IGR-opensea		NA	NA
cg21590968	-0.155154	0.66876	-7.27539	3.96481e-12	1.00934e-10	16.4911	0.602937	0.758091	0.155154	2	240399122	F	II		IGR	opensea	IGR-opensea		NA	NA
cg12731799	-0.159845	0.586299	-7.26341	4.2686e-12	1.07853e-10	16.4185	0.518486	0.678331	0.159845	11	126603252	R	I	KIRREL3	Body	opensea	Body-opensea		NA	TRUE
cg25941985	-0.157069	0.840865	-7.26079	4.33811e-12	1.09418e-10	16.4026	0.77423	0.931298	0.157069	4	1562020	F	I		IGR	opensea	IGR-opensea		NA	NA
cg11112911	-0.158583	0.627855	-7.26011	4.35632e-12	1.09823e-10	16.3985	0.560577	0.71916	0.158583	12	132966038	F	I		IGR	island	IGR-island	chr12:132965817-132966082	NA	NA		rs71452511
cg21239940	-0.154041	0.596172	-7.25951	4.37239e-12	1.10166e-10	16.3949	0.530821	0.684862	0.154041	8	68870412	F	II	PREX2	Body	opensea	Body-opensea		NA	TRUE
cg10787000	-0.153595	0.823366	-7.2595	4.37266e-12	1.10166e-10	16.3948	0.758204	0.911799	0.153595	8	1311396	F	I		IGR	island	IGR-island	chr8:1311387-1311626	NA	NA
cg00040312	0.187139	0.403837	7.25885	4.39009e-12	1.10559e-10	16.3909	0.483229	0.29609	-0.187139	12	54424679	F	I	HOXC4	5'UTR	island	5'UTR-island	chr12:54424610-54425173	NA	NA
cg03661567	-0.157119	0.609203	-7.25136	4.59745e-12	1.1533e-10	16.3455	0.542546	0.699666	0.157119	16	50978181	R	I		IGR	opensea	IGR-opensea		NA	NA
cg06106737	-0.162264	0.843666	-7.24008	4.92759e-12	1.22715e-10	16.2773	0.774827	0.937091	0.162264	12	133012655	F	I		IGR	shore	IGR-shore	chr12:133010683-133010929	NA	NA			rs73484580
cg18332213	-0.158405	0.736171	-7.2384	4.97882e-12	1.2382e-10	16.2672	0.668969	0.827374	0.158405	6	169682412	F	I		IGR	opensea	IGR-opensea		NA	NA		rs9717604
cg10856724	-0.160216	0.813691	-7.2378	4.99718e-12	1.24259e-10	16.2635	0.745721	0.905937	0.160216	12	34555212	F	I		IGR	opensea	IGR-opensea		NA	NA		rs12829284
cg05974921	-0.157587	0.690457	-7.23766	5.00145e-12	1.2434e-10	16.2627	0.623602	0.781189	0.157587	5	4629593	F	II		IGR	opensea	IGR-opensea		NA	NA		rs35994291
cg15486123	-0.164766	0.570737	-7.23677	5.02886e-12	1.24943e-10	16.2573	0.500836	0.665603	0.164766	1	152881815	F	II	IVL	5'UTR	opensea	5'UTR-opensea		NA	NA
cg09077096	-0.192087	0.665048	-7.23526	5.07595e-12	1.26001e-10	16.2482	0.583557	0.775643	0.192087	7	3033798	R	II	CARD11	5'UTR	opensea	5'UTR-opensea		NA	NA
cg18668836	-0.168293	0.768186	-7.23461	5.09609e-12	1.26474e-10	16.2443	0.696789	0.865082	0.168293	2	113103184	R	II		IGR	opensea	IGR-opensea		NA	NA
cg02237540	-0.161127	0.729864	-7.23382	5.12115e-12	1.27053e-10	16.2395	0.661507	0.822634	0.161127	4	619865	R	I	PDE6B	1stExon	island	1stExon-island	chr4:619513-619912	NA	NA
cg07563611	-0.150847	0.589002	-7.23267	5.15719e-12	1.27823e-10	16.2326	0.525006	0.675853	0.150847	16	70794856	R	I	VAC14	Body	shore	Body-shore	chr16:70796405-70796628	TRUE	TRUE
cg08540929	-0.163125	0.780221	-7.22846	5.29257e-12	1.30891e-10	16.2071	0.711017	0.874142	0.163125	5	1193937	R	I		IGR	island	IGR-island	chr5:1193723-1193983	NA	NA			rs62331274
cg00584686	-0.154507	0.684697	-7.22604	5.37187e-12	1.32579e-10	16.1925	0.619149	0.773656	0.154507	2	1161942	R	II	SNTG2	Body	shore	Body-shore	chr2:1163016-1163820	NA	NA
cg20826162	-0.171057	0.784962	-7.22497	5.40703e-12	1.33374e-10	16.186	0.712393	0.88345	0.171057	1	3511710	F	I	MEGF6	Body	island	Body-island	chr1:3511709-3512118	NA	NA		rs55901423
cg26301389	0.176425	0.264163	7.22446	5.42403e-12	1.33729e-10	16.183	0.33901	0.162585	-0.176425	5	139048106	F	I	CXXC5	5'UTR	island	5'UTR-island	chr5:139047905-139048235	NA	TRUE
cg25416582	-0.156552	0.586474	-7.21946	5.59301e-12	1.3751e-10	16.1528	0.520058	0.67661	0.156552	5	2095032	F	I		IGR	opensea	IGR-opensea		NA	NA		rs34023217
cg07500347	-0.160942	0.669614	-7.21642	5.69832e-12	1.39851e-10	16.1345	0.601336	0.762278	0.160942	16	875881	R	I		IGR	shore	IGR-shore	chr16:874280-874895	NA	NA
cg06224587	-0.153036	0.564056	-7.21523	5.7404e-12	1.40788e-10	16.1272	0.499132	0.652168	0.153036	4	6540449	F	I		IGR	opensea	IGR-opensea		NA	NA
cg27125824	-0.15198	0.779874	-7.20693	6.03981e-12	1.47629e-10	16.0772	0.715397	0.867377	0.15198	10	135023541	F	I	KNDC1	Body	shelf	Body-shelf	chr10:135020618-135020932	NA	NA		rs9418943
cg09417355	-0.157596	0.504237	-7.20682	6.04397e-12	1.47721e-10	16.0766	0.437378	0.594974	0.157596	1	152814273	R	II	LCE6A	TSS1500	opensea	TSS1500-opensea		NA	NA
cg15824094	-0.170987	0.677954	-7.20335	6.17404e-12	1.50563e-10	16.0556	0.605414	0.776401	0.170987	1	2429005	R	I	PLCH2	Body	opensea	Body-opensea		NA	NA
cg05138776	-0.160813	0.646785	-7.20206	6.22304e-12	1.51635e-10	16.0479	0.578561	0.739374	0.160813	5	1872998	F	II		IGR	shore	IGR-shore	chr5:1874907-1879032	NA	NA		rs263203
cg11005831	-0.166589	0.657458	-7.2001	6.29836e-12	1.53253e-10	16.036	0.586784	0.753373	0.166589	5	15928441	F	I	FBXL7	Body	island	Body-island	chr5:15928088-15928518	NA	NA
cg06074146	-0.172686	0.666507	-7.19897	6.342e-12	1.54179e-10	16.0293	0.593246	0.765932	0.172686	13	21298449	R	II		IGR	shelf	IGR-shelf	chr13:21295611-21296438	NA	NA
cg15991708	-0.153956	0.784593	-7.19865	6.35431e-12	1.54458e-10	16.0274	0.719278	0.873234	0.153956	10	131671760	F	I	EBF3	Body	opensea	Body-opensea		NA	NA
cg06809074	-0.175785	0.770261	-7.19753	6.398e-12	1.55362e-10	16.0206	0.695686	0.87147	0.175785	8	976415	R	I		IGR	island	IGR-island	chr8:976015-976416	NA	NA
cg03436967	-0.150378	0.693493	-7.19735	6.40526e-12	1.55528e-10	16.0195	0.629696	0.780074	0.150378	7	147207052	F	II	MIR548I4	Body	opensea	Body-opensea		NA	TRUE
cg01837362	-0.151509	0.343469	-7.1969	6.42297e-12	1.55895e-10	16.0168	0.279192	0.430701	0.151509	12	34492938	R	I		IGR	shore	IGR-shore	chr12:34493973-34496968	NA	NA
cg10145449	-0.155179	0.771454	-7.19389	6.54235e-12	1.58494e-10	15.9987	0.705621	0.8608	0.155179	8	145101671	R	I	SPATC1	Body	island	Body-island	chr8:145101631-145101834	NA	NA
cg25356393	-0.150678	0.581597	-7.184	6.9507e-12	1.67453e-10	15.9392	0.517673	0.668351	0.150678	20	62052156	F	I	KCNQ2	Body	island	Body-island	chr20:62051941-62052286	NA	NA		rs11086165
cg07734975	-0.169635	0.56608	-7.18239	7.01963e-12	1.68966e-10	15.9295	0.494114	0.663749	0.169635	11	9780844	R	I		IGR	shore	IGR-shore	chr11:9779592-9780470	TRUE	TRUE
cg05681996	-0.154041	0.652367	-7.18184	7.04307e-12	1.69474e-10	15.9262	0.587016	0.741057	0.154041	8	140376014	F	II		IGR	opensea	IGR-opensea		NA	TRUE
cg11401293	-0.192502	0.687393	-7.17945	7.14669e-12	1.71609e-10	15.9118	0.605725	0.798228	0.192502	21	47404268	R	I	COL6A1	Body	island	Body-island	chr21:47404108-47404312	NA	NA
cg03167844	-0.153876	0.79728	-7.17691	7.2588e-12	1.74131e-10	15.8965	0.731999	0.885876	0.153876	2	817733	R	I		IGR	opensea	IGR-opensea		NA	NA
cg22658846	-0.179266	0.780564	-7.17206	7.4773e-12	1.78742e-10	15.8674	0.704512	0.883778	0.179266	8	2019760	F	I	MYOM2	Body	opensea	Body-opensea		NA	NA
cg07643097	-0.150526	0.709736	-7.16994	7.57476e-12	1.80712e-10	15.8547	0.645877	0.796402	0.150526	2	81425934	F	I		IGR	shelf	IGR-shelf	chr2:81421204-81422532	NA	NA
cg17778888	-0.179371	0.773942	-7.16799	7.66552e-12	1.82696e-10	15.843	0.697845	0.877216	0.179371	5	510421	R	I	SLC9A3	Body	shore	Body-shore	chr5:507745-508835	NA	NA
cg01239704	-0.168702	0.75882	-7.16712	7.70607e-12	1.83626e-10	15.8378	0.687249	0.855951	0.168702	7	157605569	R	I	PTPRN2	Body	opensea	Body-opensea		NA	NA
cg16768697	-0.155717	0.599365	-7.16696	7.7139e-12	1.83776e-10	15.8368	0.533303	0.68902	0.155717	7	1787831	R	I		IGR	shore	IGR-shore	chr7:1784027-1786934	NA	NA
cg22686132	-0.160766	0.581794	-7.1667	7.72605e-12	1.83993e-10	15.8352	0.51359	0.674357	0.160766	6	28725957	F	I		IGR	opensea	IGR-opensea		NA	NA
cg07804408	-0.16858	0.575251	-7.16578	7.76952e-12	1.84943e-10	15.8297	0.503732	0.672313	0.16858	5	166524123	R	I		IGR	opensea	IGR-opensea		NA	NA
cg00299737	-0.162422	0.709033	-7.16576	7.77069e-12	1.84958e-10	15.8296	0.640127	0.802549	0.162422	16	49671991	R	I	ZNF423	Body	shore	Body-shore	chr16:49672443-49672725	NA	NA
cg22385595	-0.154627	0.71014	-7.16568	7.77418e-12	1.85017e-10	15.8291	0.64454	0.799168	0.154627	8	1563040	F	II	DLGAP2	Body	opensea	Body-opensea		NA	NA
cg26569914	-0.158452	0.764862	-7.16223	7.93979e-12	1.88671e-10	15.8084	0.69764	0.856092	0.158452	2	240399084	R	I		IGR	opensea	IGR-opensea		NA	NA
cg15899738	-0.168593	0.684724	-7.16134	7.9832e-12	1.89565e-10	15.803	0.613199	0.781793	0.168593	7	3033579	F	II	CARD11	5'UTR	opensea	5'UTR-opensea		NA	NA		rs11275074
cg14355941	-0.150067	0.592635	-7.16079	8.01022e-12	1.90124e-10	15.7997	0.528971	0.679037	0.150067	14	101526485	R	II	MIR496	TSS1500	opensea	TSS1500-opensea		NA	NA
cg18118147	-0.185428	0.664531	-7.16058	8.02029e-12	1.90333e-10	15.7985	0.585865	0.771292	0.185428	19	51128640	F	I	SYT3	Body	island	Body-island	chr19:51128325-51128793	NA	NA		rs16986142
cg02390561	-0.156746	0.825509	-7.15729	8.18292e-12	1.93734e-10	15.7788	0.759011	0.915756	0.156746	12	132846284	R	I	GALNT9	Body	island	Body-island	chr12:132845758-132846356	NA	NA		rs79247684
cg06265811	-0.163834	0.671771	-7.15549	8.27338e-12	1.95657e-10	15.768	0.602266	0.7661	0.163834	11	77896927	F	I	KCTD21	5'UTR	shelf	5'UTR-shelf	chr11:77899564-77899990	TRUE	NA
cg13945749	-0.185833	0.758666	-7.15216	8.44314e-12	1.9924e-10	15.748	0.679828	0.865661	0.185833	5	2866465	R	I		IGR	shore	IGR-shore	chr5:2866699-2867005	NA	NA
cg13973727	-0.169128	0.753334	-7.15092	8.50757e-12	2.00616e-10	15.7405	0.681583	0.850711	0.169128	2	1229277	R	I	SNTG2	Body	opensea	Body-opensea		NA	NA
cg10861897	-0.162723	0.763623	-7.14759	8.68215e-12	2.04239e-10	15.7206	0.694589	0.857312	0.162723	8	49835988	R	I		IGR	island	IGR-island	chr8:49835987-49836231	NA	NA
cg19993573	-0.1512	0.820745	-7.14724	8.70059e-12	2.04632e-10	15.7185	0.756599	0.9078	0.1512	8	1495289	R	I	DLGAP2	5'UTR	island	5'UTR-island	chr8:1495105-1495333	NA	NA
cg19075377	-0.163349	0.778472	-7.13953	9.11907e-12	2.13458e-10	15.6723	0.709172	0.872521	0.163349	13	112770169	F	I		IGR	opensea	IGR-opensea		NA	NA
cg23240355	-0.153834	0.688186	-7.13599	9.31812e-12	2.17722e-10	15.6511	0.622923	0.776757	0.153834	17	10276428	F	I	MYH13	TSS200	opensea	TSS200-opensea		NA	NA
cg19669785	-0.155091	0.726579	-7.13453	9.40114e-12	2.19491e-10	15.6424	0.660782	0.815874	0.155091	14	97081558	R	I		IGR	opensea	IGR-opensea		NA	NA
cg13713739	-0.196915	0.735282	-7.13394	9.43508e-12	2.20212e-10	15.6388	0.651742	0.848657	0.196915	9	132483377	R	I	PRRX2	Body	shore	Body-shore	chr9:132481472-132481745	TRUE	NA
cg24820672	-0.173751	0.526865	-7.13341	9.46567e-12	2.20869e-10	15.6356	0.453153	0.626904	0.173751	13	112984728	F	I		IGR	shore	IGR-shore	chr13:112984966-112985733	NA	NA
cg10880203	-0.158042	0.782236	-7.12801	9.78186e-12	2.27613e-10	15.6034	0.715188	0.873229	0.158042	10	130298586	F	I		IGR	shore	IGR-shore	chr10:130298859-130299159	NA	NA
cg14928057	0.154419	0.317249	7.12104	1.02058e-11	2.36379e-10	15.5617	0.38276	0.228341	-0.154419	17	4891542	R	I	INCA1	3'UTR	shore	3'UTR-shore	chr17:4890282-4890991	NA	NA
cg04401986	0.151988	0.407514	7.11912	1.03261e-11	2.38796e-10	15.5502	0.471994	0.320006	-0.151988	4	81189927	F	I	FGF5	Body	shelf	Body-shelf	chr4:81187494-81187913	NA	NA		rs78757752
cg24640610	-0.155066	0.648774	-7.11758	1.04229e-11	2.40747e-10	15.541	0.582989	0.738055	0.155066	5	15554487	R	II	FBXL7	Body	opensea	Body-opensea		NA	TRUE
cg15305070	-0.181603	0.722436	-7.11527	1.05702e-11	2.43799e-10	15.5272	0.645392	0.826995	0.181603	2	925929	F	I		IGR	opensea	IGR-opensea		NA	NA
cg14556787	-0.163886	0.734869	-7.11305	1.0714e-11	2.46707e-10	15.5139	0.665342	0.829227	0.163886	10	1669329	F	I	ADARB2	Body	opensea	Body-opensea		NA	NA		rs17294019
cg06041466	-0.153906	0.550585	-7.11173	1.08007e-11	2.48497e-10	15.506	0.485292	0.639197	0.153906	1	171106397	R	II	FMO6P	TSS1500	opensea	TSS1500-opensea		NA	TRUE
cg07929646	-0.154341	0.733058	-7.11103	1.08464e-11	2.49389e-10	15.5019	0.66758	0.821921	0.154341	14	107221264	R	I		IGR	island	IGR-island	chr14:107221092-107221298	NA	NA
cg20662737	-0.154942	0.488375	-7.11085	1.08586e-11	2.49639e-10	15.5007	0.422642	0.577584	0.154942	5	4941328	R	I		IGR	opensea	IGR-opensea		NA	NA
cg18447772	0.163044	0.466587	7.10467	1.1274e-11	2.58316e-10	15.4639	0.535757	0.372713	-0.163044	7	27205224	F	I	HOXA9	TSS200	island	TSS200-island	chr7:27203915-27206462	TRUE	NA
cg23639196	-0.162912	0.617801	-7.10206	1.14541e-11	2.61826e-10	15.4483	0.548686	0.711598	0.162912	2	867119	F	I		IGR	shelf	IGR-shelf	chr2:863930-865091	NA	NA
cg16104371	-0.152546	0.542158	-7.10179	1.1473e-11	2.62203e-10	15.4467	0.477442	0.629988	0.152546	4	1538525	F	I		IGR	shelf	IGR-shelf	chr4:1541591-1541868	NA	NA
cg18730194	-0.155669	0.637808	-7.10139	1.15007e-11	2.62774e-10	15.4443	0.571767	0.727436	0.155669	10	2357587	R	II		IGR	shore	IGR-shore	chr10:2357248-2357471	NA	NA
cg04227892	-0.182345	0.560949	-7.10022	1.15824e-11	2.64391e-10	15.4373	0.48359	0.665936	0.182345	5	2169402	F	I		IGR	opensea	IGR-opensea		NA	NA		rs77261235
cg23740652	-0.160269	0.683297	-7.09766	1.17644e-11	2.68087e-10	15.422	0.615304	0.775572	0.160269	7	157561925	F	I	PTPRN2	Body	shore	Body-shore	chr7:157560974-157561195	NA	NA
cg14382249	-0.154918	0.60649	-7.09631	1.18609e-11	2.70012e-10	15.414	0.540767	0.695685	0.154918	2	816777	R	II		IGR	opensea	IGR-opensea		NA	NA
cg12544663	-0.175862	0.824734	-7.09564	1.1909e-11	2.71004e-10	15.41	0.750126	0.925988	0.175862	2	720852	F	I		IGR	opensea	IGR-opensea		NA	NA
cg00514609	0.154755	0.397928	7.09362	1.2056e-11	2.73987e-10	15.398	0.463582	0.308827	-0.154755	11	111783348	F	I	CRYAB	TSS1500	opensea	TSS1500-opensea		NA	TRUE
cg14670938	-0.16399	0.561156	-7.09029	1.23026e-11	2.78922e-10	15.3781	0.491585	0.655574	0.16399	5	1927225	R	I		IGR	shelf	IGR-shelf	chr5:1930754-1931986	NA	NA
cg10357555	-0.150679	0.618613	-7.08629	1.26043e-11	2.85064e-10	15.3543	0.554689	0.705368	0.150679	8	85618021	F	II	RALYL	Body	opensea	Body-opensea		NA	NA
cg07037412	-0.176967	0.768183	-7.08257	1.28924e-11	2.91013e-10	15.3321	0.693106	0.870073	0.176967	16	1234809	R	I	CACNA1H	Body	shore	Body-shore	chr16:1235938-1237262	NA	NA
cg25022271	-0.150179	0.812423	-7.07896	1.31776e-11	2.96652e-10	15.3106	0.74871	0.89889	0.150179	12	130420604	R	I		IGR	opensea	IGR-opensea		NA	NA
cg10860802	-0.171503	0.678352	-7.0769	1.33426e-11	2.99974e-10	15.2983	0.605594	0.777096	0.171503	7	154632602	R	I	DPP6	Body	opensea	Body-opensea		NA	NA
cg26675876	0.189309	0.329452	7.0763	1.33917e-11	3.00946e-10	15.2947	0.409765	0.220456	-0.189309	8	11059176	F	I	XKR6	TSS1500	island	TSS1500-island	chr8:11059011-11059242	TRUE	NA	high-CpG:11096240-11096755
cg21554895	-0.168009	0.578198	-7.07604	1.34123e-11	3.01296e-10	15.2932	0.506921	0.67493	0.168009	13	20703415	R	I		IGR	shore	IGR-shore	chr13:20701817-20702634	NA	NA
cg26714388	-0.154834	0.825244	-7.076	1.34155e-11	3.0135e-10	15.293	0.759556	0.914391	0.154834	12	34488729	F	I		IGR	island	IGR-island	chr12:34488610-34489037	NA	NA
cg09115607	-0.154079	0.551064	-7.07462	1.35286e-11	3.03569e-10	15.2847	0.485697	0.639777	0.154079	5	2442958	F	I		IGR	opensea	IGR-opensea		NA	NA
cg00685614	-0.166752	0.640633	-7.0632	1.44972e-11	3.23151e-10	15.2168	0.56989	0.736641	0.166752	16	89118838	F	I		IGR	island	IGR-island	chr16:89118801-89119152	NA	NA
cg03114573	-0.154623	0.640914	-7.05943	1.48317e-11	3.2967e-10	15.1944	0.575316	0.729939	0.154623	12	45410052	F	II	DBX2	3'UTR	opensea	3'UTR-opensea		NA	NA		rs77385942
cg13671900	-0.165661	0.806832	-7.05865	1.49017e-11	3.31061e-10	15.1898	0.736552	0.902213	0.165661	5	3346810	F	I		IGR	opensea	IGR-opensea		NA	NA
cg19483465	-0.178532	0.585981	-7.05691	1.50591e-11	3.34125e-10	15.1795	0.51024	0.688772	0.178532	12	132896939	F	I	GALNT9	Body	shore	Body-shore	chr12:132896299-132896569	TRUE	NA		rs28455494
cg13071185	-0.16609	0.677511	-7.05664	1.50841e-11	3.34619e-10	15.1778	0.607049	0.773139	0.16609	11	860134	R	I	TSPAN4	5'UTR	shore	5'UTR-shore	chr11:858575-858932	TRUE	TRUE
cg14642259	-0.191646	0.791819	-7.05594	1.5148e-11	3.3585e-10	15.1737	0.710515	0.902161	0.191646	11	47359017	F	I	MYBPC3	Body	shore	Body-shore	chr11:47359953-47360216	NA	NA		rs3729952
cg05369553	-0.150411	0.629339	-7.05513	1.52223e-11	3.37312e-10	15.1689	0.565528	0.715939	0.150411	1	158688926	R	II	OR6K3	TSS1500	opensea	TSS1500-opensea		NA	NA
cg15999188	-0.175045	0.780559	-7.0502	1.56831e-11	3.46606e-10	15.1396	0.706298	0.881343	0.175045	2	3800191	F	I		IGR	opensea	IGR-opensea		NA	NA
cg26787589	-0.159386	0.673328	-7.04775	1.59169e-11	3.51213e-10	15.125	0.60571	0.765096	0.159386	12	126926911	R	II	LOC100128554	TSS200	opensea	TSS200-opensea		NA	NA
cg02767633	-0.188712	0.771738	-7.04705	1.5984e-11	3.525e-10	15.1209	0.691678	0.88039	0.188712	5	2253242	F	I		IGR	opensea	IGR-opensea		NA	NA
cg25267258	-0.18992	0.718301	-7.04675	1.60134e-11	3.53071e-10	15.1191	0.637729	0.827649	0.18992	6	29274620	R	I	OR14J1	1stExon	opensea	1stExon-opensea		NA	NA
cg18746831	-0.180726	0.757363	-7.04626	1.60606e-11	3.5395e-10	15.1162	0.680692	0.861417	0.180726	5	5025803	F	I		IGR	opensea	IGR-opensea		NA	NA		rs733500
cg03592218	-0.150483	0.769661	-7.04316	1.63647e-11	3.60167e-10	15.0978	0.70582	0.856303	0.150483	16	86741420	F	I		IGR	opensea	IGR-opensea		NA	NA		rs77299028
cg16298867	-0.162082	0.685935	-7.04248	1.64321e-11	3.61503e-10	15.0938	0.617173	0.779255	0.162082	1	2833643	F	I		IGR	opensea	IGR-opensea		NA	NA		rs11587665
cg00406319	-0.176718	0.621555	-7.04152	1.65275e-11	3.63329e-10	15.0881	0.546584	0.723302	0.176718	10	126851303	F	I		IGR	island	IGR-island	chr10:126847224-126851327	NA	NA
cg09900986	-0.160838	0.81493	-7.04137	1.65426e-11	3.63575e-10	15.0872	0.746696	0.907534	0.160838	5	1193802	F	I		IGR	island	IGR-island	chr5:1193723-1193983	NA	NA
cg18620927	-0.159565	0.797568	-7.04002	1.66779e-11	3.66278e-10	15.0792	0.729873	0.889438	0.159565	10	2035340	F	I		IGR	opensea	IGR-opensea		NA	NA		rs4880547
cg19451915	-0.169371	0.675792	-7.03971	1.67092e-11	3.66895e-10	15.0773	0.603938	0.773309	0.169371	7	52196709	R	I		IGR	opensea	IGR-opensea		NA	TRUE
cg11666040	-0.157446	0.700824	-7.03734	1.69495e-11	3.71519e-10	15.0633	0.634028	0.791474	0.157446	10	135012454	F	I	KNDC1	Body	shelf	Body-shelf	chr10:135014703-135015402	NA	NA		rs55657027
cg10969997	-0.172522	0.76595	-7.03312	1.73877e-11	3.80038e-10	15.0382	0.692759	0.865281	0.172522	14	104842040	R	I		IGR	opensea	IGR-opensea		NA	NA
cg09313931	0.157305	0.372813	7.03165	1.75419e-11	3.83013e-10	15.0296	0.439549	0.282244	-0.157305	6	149803444	F	I	ZC3H12D	5'UTR	opensea	5'UTR-opensea		NA	NA
cg05721751	-0.161785	0.809393	-7.03025	1.76908e-11	3.85938e-10	15.0213	0.740757	0.902542	0.161785	10	1707576	F	I	ADARB2	Body	opensea	Body-opensea		NA	NA
cg11436025	-0.155918	0.859459	-7.02975	1.77441e-11	3.8689e-10	15.0183	0.793312	0.949231	0.155918	11	117376238	R	I	DSCAML1	Body	opensea	Body-opensea		NA	NA
cg11686819	-0.203276	0.563593	-7.0292	1.78038e-11	3.8798e-10	15.015	0.477354	0.680631	0.203276	5	2137080	R	I		IGR	island	IGR-island	chr5:2136797-2137305	NA	NA
cg00910015	-0.155949	0.77618	-7.02868	1.78594e-11	3.88964e-10	15.0119	0.71002	0.865969	0.155949	2	3826621	F	I		IGR	opensea	IGR-opensea		NA	NA		rs72437937
cg25379549	-0.172532	0.806405	-7.02053	1.87586e-11	4.06869e-10	14.9637	0.733209	0.905741	0.172532	10	1707569	F	I	ADARB2	Body	opensea	Body-opensea		NA	NA
cg15251598	-0.162832	0.732476	-7.0191	1.89216e-11	4.09813e-10	14.9552	0.663396	0.826227	0.162832	10	131731416	F	I	EBF3	Body	opensea	Body-opensea		NA	NA		rs60064330
cg17657322	-0.15302	0.838063	-7.01634	1.92388e-11	4.15957e-10	14.9389	0.773145	0.926165	0.15302	13	112690816	F	I		IGR	shore	IGR-shore	chr13:112691292-112691533	NA	NA		rs73577007
cg13931996	-0.155442	0.748466	-7.01	1.9988e-11	4.30607e-10	14.9013	0.682521	0.837963	0.155442	1	4842898	F	I	AJAP1	3'UTR	opensea	3'UTR-opensea		NA	NA
cg20100745	-0.177495	0.42976	-7.00758	2.02809e-11	4.36214e-10	14.8871	0.354459	0.531954	0.177495	8	134307728	F	I	NDRG1	5'UTR	shore	5'UTR-shore	chr8:134308328-134310145	NA	NA
cg06423211	-0.155307	0.371232	-7.00599	2.04771e-11	4.40012e-10	14.8776	0.305345	0.460651	0.155307	19	551401	R	I		IGR	island	IGR-island	chr19:551290-551542	TRUE	NA
cg15979348	-0.158794	0.672204	-7.00553	2.0533e-11	4.41055e-10	14.8749	0.604837	0.76363	0.158794	13	112237479	F	I		IGR	shore	IGR-shore	chr13:112238672-112238893	NA	NA
cg18705098	-0.166151	0.79129	-7.00534	2.05566e-11	4.41484e-10	14.8738	0.720801	0.886952	0.166151	10	134736248	R	I		IGR	island	IGR-island	chr10:134735972-134736254	NA	NA
cg01025095	-0.158966	0.48283	-7.00528	2.05645e-11	4.41602e-10	14.8734	0.41539	0.574356	0.158966	5	4101132	F	I		IGR	opensea	IGR-opensea		NA	NA		rs16872792
cg10032110	-0.159823	0.826287	-6.99951	2.12905e-11	4.55779e-10	14.8394	0.758483	0.918306	0.159823	7	1718541	R	I		IGR	opensea	IGR-opensea		NA	NA
cg17530965	-0.150405	0.827455	-6.99081	2.24343e-11	4.77855e-10	14.788	0.763647	0.914052	0.150405	5	1034427	R	I	NKD2	Body	shelf	Body-shelf	chr5:1037964-1038426	NA	NA
cg09363841	-0.16523	0.77375	-6.98621	2.30633e-11	4.90123e-10	14.7608	0.703653	0.868883	0.16523	1	37513479	F	I		IGR	opensea	IGR-opensea		NA	NA		rs592520
cg17883960	-0.152137	0.726077	-6.98581	2.31195e-11	4.9123e-10	14.7584	0.661534	0.813671	0.152137	12	130106821	R	I	TMEM132D	Body	opensea	Body-opensea		NA	NA
cg08273362	-0.163165	0.774166	-6.97756	2.42936e-11	5.13543e-10	14.7098	0.704944	0.86811	0.163165	19	1005172	F	I	GRIN3B	Body	island	Body-island	chr19:1004324-1005605	NA	NA		rs61740285
cg18837292	-0.213014	0.709383	-6.97698	2.43779e-11	5.15096e-10	14.7064	0.619014	0.832027	0.213014	5	4116583	R	I		IGR	opensea	IGR-opensea		NA	NA
cg16543823	-0.154621	0.628235	-6.97136	2.52151e-11	5.30999e-10	14.6732	0.562639	0.717259	0.154621	7	52735864	F	I		IGR	opensea	IGR-opensea		NA	NA		rs78211893
cg11433622	0.151249	0.469805	6.96624	2.60019e-11	5.45942e-10	14.6431	0.533971	0.382722	-0.151249	2	66667549	R	I	MEIS1	Body	opensea	Body-opensea		NA	TRUE
cg06109379	-0.166508	0.727199	-6.96305	2.65032e-11	5.55431e-10	14.6243	0.65656	0.823068	0.166508	12	247315	F	I	IQSEC3	Body	shore	Body-shore	chr12:247455-248501	NA	NA
cg18661379	0.159613	0.382632	6.96101	2.6829e-11	5.61671e-10	14.6123	0.450347	0.290734	-0.159613	10	104393081	F	II	SUFU	3'UTR	opensea	3'UTR-opensea		NA	TRUE
cg04904609	-0.169291	0.645436	-6.95707	2.7471e-11	5.73746e-10	14.5891	0.573616	0.742906	0.169291	10	131691217	F	I	EBF3	Body	shelf	Body-shelf	chr10:131694674-131694933	NA	NA
cg24884703	0.152739	0.450777	6.95647	2.75692e-11	5.75664e-10	14.5856	0.515576	0.362836	-0.152739	1	91185422	R	I		IGR	island	IGR-island	chr1:91185156-91185577	NA	NA
cg03262885	-0.153622	0.790538	-6.95596	2.76547e-11	5.77349e-10	14.5825	0.725365	0.878987	0.153622	7	157710179	R	I	PTPRN2	Body	opensea	Body-opensea		NA	NA
cg05982460	-0.197641	0.670553	-6.95391	2.79959e-11	5.83461e-10	14.5705	0.586705	0.784346	0.197641	16	3211519	R	I		IGR	shelf	IGR-shelf	chr16:3207597-3209413	NA	NA		rs72774417
cg16967003	-0.165932	0.540026	-6.95297	2.81536e-11	5.86203e-10	14.565	0.469631	0.635563	0.165932	7	1293599	F	I		IGR	opensea	IGR-opensea		NA	NA		rs12532944
cg19197915	-0.160809	0.723423	-6.95239	2.82515e-11	5.88037e-10	14.5616	0.655201	0.81601	0.160809	8	2146804	R	I		IGR	opensea	IGR-opensea		NA	NA
cg05063520	-0.177888	0.763721	-6.95039	2.85919e-11	5.94608e-10	14.5498	0.688253	0.866141	0.177888	8	49835999	R	I		IGR	island	IGR-island	chr8:49835987-49836231	NA	NA
cg18588323	0.170534	0.419738	6.94774	2.90498e-11	6.03469e-10	14.5342	0.492086	0.321552	-0.170534	15	51385891	R	I	TNFAIP8L3	Body	island	Body-island	chr15:51385861-51387203	TRUE	NA
cg14302214	-0.161647	0.551369	-6.94316	2.98581e-11	6.1823e-10	14.5073	0.482791	0.644438	0.161647	10	3805273	R	I		IGR	opensea	IGR-opensea		NA	NA
cg18640250	-0.161291	0.719715	-6.94071	3.02978e-11	6.26363e-10	14.4929	0.651289	0.812579	0.161291	5	1855934	F	I		IGR	shore	IGR-shore	chr5:1856773-1858444	NA	NA
cg00177787	-0.203299	0.700589	-6.93711	3.09571e-11	6.38893e-10	14.4718	0.614341	0.81764	0.203299	10	3330480	R	I		IGR	opensea	IGR-opensea		NA	NA
cg27570984	-0.16119	0.765317	-6.93591	3.11812e-11	6.43004e-10	14.4647	0.696933	0.858123	0.16119	16	55125644	F	I		IGR	opensea	IGR-opensea		NA	NA
cg05909343	-0.152011	0.771011	-6.93377	3.15819e-11	6.50336e-10	14.4522	0.706521	0.858532	0.152011	10	133051487	R	I	TCERG1L	Body	opensea	Body-opensea		NA	NA
cg09568647	0.165151	0.436528	6.93359	3.16164e-11	6.50898e-10	14.4511	0.506592	0.341442	-0.165151	5	53942237	F	II		IGR	opensea	IGR-opensea		TRUE	TRUE		rs1867686
cg10442932	-0.151412	0.617276	-6.9334	3.16522e-11	6.51486e-10	14.45	0.553041	0.704452	0.151412	8	143262113	F	I		IGR	opensea	IGR-opensea		NA	NA
cg12499235	-0.170566	0.589578	-6.93009	3.2285e-11	6.63677e-10	14.4306	0.517217	0.687783	0.170566	11	2293173	R	I	ASCL2	TSS1500	shore	TSS1500-shore	chr11:2290104-2292932	NA	NA
cg18121003	0.156171	0.504326	6.92921	3.24559e-11	6.66886e-10	14.4254	0.570581	0.41441	-0.156171	11	86085757	F	I	CCDC81	TSS200	island	TSS200-island	chr11:86085693-86086006	NA	TRUE
cg06972389	-0.167143	0.713561	-6.92614	3.30563e-11	6.78072e-10	14.4074	0.642652	0.809795	0.167143	5	3221246	F	I		IGR	opensea	IGR-opensea		NA	NA
cg22732636	-0.151969	0.638215	-6.9168	3.49529e-11	7.13719e-10	14.3526	0.573743	0.725712	0.151969	8	13373141	R	I	DLC1	TSS1500	opensea	TSS1500-opensea		NA	NA
cg18698788	0.158873	0.494808	6.91479	3.53757e-11	7.21371e-10	14.3408	0.562208	0.403335	-0.158873	15	89952499	R	I		IGR	island	IGR-island	chr15:89952271-89953061	NA	NA
cg06421774	-0.157519	0.417798	-6.90803	3.68305e-11	7.47654e-10	14.3013	0.350972	0.508491	0.157519	5	2066690	R	I		IGR	opensea	IGR-opensea		NA	NA
cg15645203	-0.179048	0.693136	-6.90767	3.69109e-11	7.49075e-10	14.2991	0.617176	0.796224	0.179048	10	131631713	R	I		IGR	opensea	IGR-opensea		NA	NA
cg26479667	-0.188792	0.462545	-6.90714	3.70278e-11	7.51278e-10	14.296	0.382451	0.571243	0.188792	5	3339581	R	I		IGR	opensea	IGR-opensea		NA	NA
cg04413904	-0.150854	0.78978	-6.90518	3.74634e-11	7.59091e-10	14.2845	0.725782	0.876636	0.150854	16	1088479	F	I		IGR	island	IGR-island	chr16:1088437-1088780	NA	NA
cg09107594	-0.172657	0.707418	-6.90469	3.75712e-11	7.61061e-10	14.2817	0.63417	0.806827	0.172657	1	247877081	F	I	OR6F1	TSS1500	opensea	TSS1500-opensea		NA	NA		rs35374538
cg22714290	-0.168788	0.653787	-6.90268	3.80255e-11	7.69486e-10	14.2699	0.582181	0.750968	0.168788	1	207992548	F	I	LOC148696	Body	opensea	Body-opensea		TRUE	NA		rs76267423
cg16937902	-0.16172	0.727019	-6.89837	3.90146e-11	7.87115e-10	14.2447	0.65841	0.82013	0.16172	12	130765406	F	I		IGR	opensea	IGR-opensea		NA	NA		rs7298008
cg07041999	-0.162824	0.611212	-6.89456	3.99102e-11	8.03566e-10	14.2224	0.542135	0.704959	0.162824	8	2178272	F	I		IGR	opensea	IGR-opensea		NA	NA		rs35132580
cg19209911	-0.158269	0.805866	-6.88219	4.29602e-11	8.58883e-10	14.1502	0.738721	0.896991	0.158269	10	130298657	R	I		IGR	shore	IGR-shore	chr10:130298859-130299159	NA	NA
cg11906829	-0.152327	0.571725	-6.88147	4.31456e-11	8.62207e-10	14.1459	0.507101	0.659428	0.152327	7	142326370	R	II		IGR	opensea	IGR-opensea		NA	NA
cg05191879	0.156632	0.463511	6.87736	4.42143e-11	8.81658e-10	14.1219	0.52996	0.373329	-0.156632	8	144650730	R	I	C8orf73	Body	shore	Body-shore	chr8:144651572-144652288	NA	TRUE	high-CpG:144721729-144722255
cg15134787	-0.157743	0.72789	-6.87634	4.44832e-11	8.86381e-10	14.116	0.660969	0.818712	0.157743	7	57471759	R	I		IGR	shore	IGR-shore	chr7:57472316-57472797	NA	NA
cg18747742	-0.168388	0.587117	-6.87299	4.53786e-11	9.02478e-10	14.0964	0.51568	0.684068	0.168388	6	19180751	F	I		IGR	opensea	IGR-opensea		NA	NA
cg20988291	-0.170225	0.473556	-6.86864	4.65661e-11	9.23597e-10	14.0711	0.401339	0.571564	0.170225	6	19180731	F	I		IGR	opensea	IGR-opensea		NA	NA
cg07992457	-0.1718	0.792779	-6.86527	4.75092e-11	9.40131e-10	14.0514	0.719894	0.891694	0.1718	17	71744924	R	I		IGR	opensea	IGR-opensea		NA	NA
cg12030226	-0.150002	0.789981	-6.86491	4.76094e-11	9.41907e-10	14.0493	0.726343	0.876346	0.150002	11	1929115	F	I		IGR	opensea	IGR-opensea		NA	TRUE
cg18782604	0.195093	0.465836	6.86428	4.77877e-11	9.45124e-10	14.0457	0.548602	0.353509	-0.195093	6	100895050	F	I	SIM1	Body	island	Body-island	chr6:100895007-100895246	NA	TRUE
cg08949408	0.155276	0.432175	6.85824	4.95328e-11	9.75942e-10	14.0105	0.49805	0.342774	-0.155276	10	16562470	F	II	C1QL3	Body	island	Body-island	chr10:16561604-16563822	TRUE	NA			rs34833592
cg02350790	-0.157652	0.67759	-6.85756	4.97335e-11	9.79469e-10	14.0065	0.610707	0.768359	0.157652	10	130366851	R	I		IGR	opensea	IGR-opensea		NA	NA
cg24941457	-0.151099	0.767811	-6.85608	5.01736e-11	9.87273e-10	13.9978	0.703708	0.854807	0.151099	1	34420873	R	I	CSMD2	Body	opensea	Body-opensea		NA	NA
cg11856334	-0.155487	0.682424	-6.8475	5.27936e-11	1.03392e-09	13.9479	0.61646	0.771947	0.155487	2	81422363	R	II		IGR	island	IGR-island	chr2:81421204-81422532	NA	NA
cg20670679	-0.180562	0.596354	-6.8449	5.36125e-11	1.04825e-09	13.9328	0.519752	0.700314	0.180562	7	157561786	F	I	PTPRN2	Body	shore	Body-shore	chr7:157560974-157561195	NA	NA
cg07740306	-0.162481	0.794713	-6.83771	5.5948e-11	1.08936e-09	13.891	0.725782	0.888263	0.162481	18	77246369	F	I	NFATC1	Body	island	Body-island	chr18:77246356-77247889	TRUE	NA		rs55839918
cg02041108	-0.153805	0.695643	-6.83245	5.77197e-11	1.11987e-09	13.8604	0.630393	0.784197	0.153805	5	35946185	R	I		IGR	opensea	IGR-opensea		NA	NA
cg20594671	-0.158669	0.828411	-6.8324	5.77372e-11	1.12012e-09	13.8601	0.761096	0.919766	0.158669	2	1276824	F	I	SNTG2	Body	opensea	Body-opensea		NA	NA
cg10055817	-0.154851	0.742807	-6.83082	5.82772e-11	1.12959e-09	13.8509	0.677113	0.831964	0.154851	10	1229050	R	I	ADARB2	3'UTR	shore	3'UTR-shore	chr10:1230813-1231214	NA	NA
cg21588562	-0.158641	0.745632	-6.83021	5.84902e-11	1.13329e-09	13.8474	0.67833	0.836971	0.158641	5	121187589	F	I	FTMT	TSS200	island	TSS200-island	chr5:121187387-121188124	NA	NA
cg21398280	-0.173549	0.772598	-6.8251	6.02863e-11	1.16527e-09	13.8177	0.698971	0.87252	0.173549	8	876927	R	I		IGR	opensea	IGR-opensea		NA	NA
cg26956157	-0.16268	0.800769	-6.82229	6.1297e-11	1.18272e-09	13.8014	0.731753	0.894433	0.16268	16	89036698	R	I	CBFA2T3	Body	shelf	Body-shelf	chr16:89033529-89033786	NA	NA
cg02311374	-0.151768	0.740063	-6.82187	6.14503e-11	1.18542e-09	13.7989	0.675677	0.827445	0.151768	16	31383136	R	I	ITGAX	Body	island	Body-island	chr16:31382926-31383139	NA	NA
cg23235971	-0.152302	0.666122	-6.81308	6.47274e-11	1.2416e-09	13.7479	0.601509	0.753811	0.152302	7	157413057	F	I	PTPRN2	Body	shore	Body-shore	chr7:157413901-157414146	NA	NA
cg19722689	-0.151092	0.803725	-6.81262	6.49027e-11	1.24456e-09	13.7453	0.739626	0.890718	0.151092	14	106198034	R	I		IGR	opensea	IGR-opensea		NA	NA			rs7144322
cg19299265	-0.151538	0.770383	-6.81029	6.58053e-11	1.26026e-09	13.7317	0.706094	0.857632	0.151538	10	1975631	R	I		IGR	opensea	IGR-opensea		NA	NA
cg09383172	-0.169216	0.764483	-6.80874	6.6411e-11	1.27064e-09	13.7228	0.692694	0.86191	0.169216	7	157932921	F	I	PTPRN2	Body	opensea	Body-opensea		NA	NA
cg27625886	-0.16673	0.695133	-6.80857	6.6477e-11	1.27171e-09	13.7218	0.624399	0.791129	0.16673	20	62060443	F	I	KCNQ2	Body	shore	Body-shore	chr20:62059391-62059606	NA	NA
cg27102141	-0.175231	0.568624	-6.80658	6.72623e-11	1.28489e-09	13.7103	0.494283	0.669515	0.175231	10	131843798	F	I		IGR	island	IGR-island	chr10:131843516-131844219	TRUE	NA
cg08708961	0.169009	0.315261	6.80469	6.80189e-11	1.29762e-09	13.6993	0.386962	0.217953	-0.169009	1	227070630	R	II	PSEN2	Body	opensea	Body-opensea		NA	TRUE
cg11854928	-0.165886	0.636512	-6.79686	7.12359e-11	1.35262e-09	13.654	0.566136	0.732023	0.165886	12	117768754	F	I	NOS1	Body	opensea	Body-opensea		NA	NA
cg06034127	0.164494	0.282229	6.79574	7.17093e-11	1.36047e-09	13.6475	0.352015	0.18752	-0.164494	13	24844852	R	II	SPATA13	Body	opensea	Body-opensea		NA	NA	low-CpG:23742824-23742950
cg09014626	-0.175454	0.776073	-6.79085	7.38072e-11	1.39652e-09	13.6192	0.701638	0.877092	0.175454	5	2990194	R	I		IGR	opensea	IGR-opensea		NA	NA
cg24545495	-0.154179	0.648127	-6.78781	7.51401e-11	1.41973e-09	13.6016	0.582718	0.736896	0.154179	1	6149049	R	I	KCNAB2	Body	opensea	Body-opensea		NA	NA
cg24788034	-0.152368	0.580461	-6.78707	7.54718e-11	1.42547e-09	13.5973	0.51582	0.668188	0.152368	19	2588241	R	I	GNG7	5'UTR	shore	5'UTR-shore	chr19:2588375-2588590	TRUE	TRUE
cg20686446	-0.1558	0.668153	-6.78599	7.5955e-11	1.43407e-09	13.591	0.602056	0.757856	0.1558	19	50320090	F	I	MED25	TSS1500	shore	TSS1500-shore	chr19:50321414-50321762	NA	NA
cg09203501	0.170202	0.534118	6.78542	7.62072e-11	1.43846e-09	13.5878	0.606325	0.436123	-0.170202	7	5271545	R	I	WIPI2	3'UTR	shelf	3'UTR-shelf	chr7:5267748-5268110	NA	NA
cg17542385	-0.151213	0.537541	-6.78445	7.66458e-11	1.44605e-09	13.5822	0.473391	0.624603	0.151213	1	152681979	R	II		IGR	opensea	IGR-opensea		NA	NA
cg06500727	-0.182371	0.634967	-6.78421	7.67519e-11	1.44798e-09	13.5808	0.557598	0.739969	0.182371	2	1417164	F	I	TPO	TSS1500	opensea	TSS1500-opensea		NA	NA		rs2071402
cg00499781	-0.154463	0.803748	-6.78086	7.82864e-11	1.4733e-09	13.5614	0.738218	0.892681	0.154463	16	7568364	F	I	A2BP1	Body	island	Body-island	chr16:7568195-7568413	NA	NA		rs76966878
cg08883223	0.151834	0.448482	6.77654	8.0301e-11	1.50831e-09	13.5365	0.512896	0.361062	-0.151834	1	197888880	R	I	LHX9	Body	shore	Body-shore	chr1:197890478-197890824	NA	NA
cg10061374	-0.16143	0.819739	-6.77496	8.10535e-11	1.52156e-09	13.5273	0.751253	0.912683	0.16143	8	5909945	F	I		IGR	opensea	IGR-opensea		NA	NA		rs17075862
cg00731785	0.156079	0.241011	6.77193	8.25099e-11	1.54553e-09	13.5098	0.307227	0.151148	-0.156079	4	15704680	R	I	BST1	1stExon	island	1stExon-island	chr4:15704640-15705000	TRUE	NA
cg02504820	-0.156416	0.600072	-6.77181	8.25722e-11	1.54645e-09	13.5091	0.533714	0.69013	0.156416	12	129462997	R	I	GLT1D1	Body	opensea	Body-opensea		NA	NA
cg07197585	-0.154016	0.770359	-6.76692	8.49834e-11	1.58609e-09	13.4809	0.705018	0.859034	0.154016	1	92494997	F	I	EPHX4	TSS1500	shore	TSS1500-shore	chr1:92495367-92495964	NA	NA
cg23592392	-0.168733	0.789176	-6.7618	8.75816e-11	1.62952e-09	13.4513	0.717592	0.886325	0.168733	12	130434412	F	I		IGR	opensea	IGR-opensea		NA	NA		rs10847967	rs35292395
cg10786876	-0.191965	0.751003	-6.74483	9.67678e-11	1.78377e-09	13.3535	0.669563	0.861528	0.191965	20	62121918	F	I	EEF1A2	Body	island	Body-island	chr20:62121858-62122079	NA	NA
cg02637474	-0.151123	0.699859	-6.744	9.72357e-11	1.79103e-09	13.3488	0.635746	0.786869	0.151123	7	157340554	R	I	PTPRN2	Body	opensea	Body-opensea		NA	NA
cg05192145	-0.153813	0.739051	-6.74267	9.79988e-11	1.80296e-09	13.3411	0.673797	0.827609	0.153813	16	30832346	R	I		IGR	island	IGR-island	chr16:30832286-30832560	NA	NA
cg16635016	-0.154104	0.716808	-6.74143	9.87159e-11	1.81467e-09	13.334	0.65143	0.805534	0.154104	5	176292569	F	I	UNC5A	Body	shelf	Body-shelf	chr5:176296541-176296933	NA	NA
cg18231054	-0.150933	0.584364	-6.73457	1.02768e-10	1.88178e-09	13.2945	0.520332	0.671265	0.150933	1	1858037	R	I		IGR	shore	IGR-shore	chr1:1859246-1859523	NA	NA
cg05649391	-0.156404	0.714126	-6.73335	1.03507e-10	1.89299e-09	13.2875	0.647773	0.804177	0.156404	11	47359115	R	I	MYBPC3	Body	shore	Body-shore	chr11:47359953-47360216	NA	NA
cg03892356	0.163705	0.438449	6.73237	1.04104e-10	1.90228e-09	13.2818	0.5079	0.344195	-0.163705	12	54420837	F	II	HOXC4	5'UTR	shelf	5'UTR-shelf	chr12:54423427-54423712	NA	NA		rs74089890
cg21201401	0.151913	0.600403	6.72936	1.05957e-10	1.93251e-09	13.2645	0.664851	0.512937	-0.151913	20	62367884	R	I	LIME1	TSS200	shore	TSS200-shore	chr20:62368955-62371962	NA	NA
cg05141014	-0.15381	0.605743	-6.71868	1.12801e-10	2.04246e-09	13.2032	0.54049	0.6943	0.15381	5	59784203	F	I	PART1	Body	opensea	Body-opensea		NA	NA		rs79031200
cg21763482	-0.152512	0.69581	-6.71749	1.13593e-10	2.05514e-09	13.1963	0.631108	0.78362	0.152512	5	573298	F	I		IGR	opensea	IGR-opensea		NA	NA
cg25980388	-0.156787	0.831512	-6.71574	1.14764e-10	2.0752e-09	13.1863	0.764997	0.921783	0.156787	1	5870397	F	I		IGR	opensea	IGR-opensea		NA	NA
cg13935009	-0.170428	0.623999	-6.71298	1.16634e-10	2.10466e-09	13.1704	0.551696	0.722124	0.170428	1	205497713	F	I	CDK18	Body	shore	Body-shore	chr1:205498003-205498590	NA	TRUE
cg08323777	-0.162859	0.656588	-6.70863	1.19638e-10	2.15349e-09	13.1455	0.587497	0.750356	0.162859	5	1974859	F	II		IGR	opensea	IGR-opensea		NA	NA
cg23671221	0.154191	0.39097	6.70755	1.20395e-10	2.16549e-09	13.1393	0.456384	0.302193	-0.154191	1	44031300	R	I	PTPRF	Body	island	Body-island	chr1:44031286-44031853	NA	NA
cg00579868	0.183143	0.465457	6.70714	1.20684e-10	2.17004e-09	13.1369	0.543153	0.360011	-0.183143	7	5271516	R	I	WIPI2	3'UTR	shelf	3'UTR-shelf	chr7:5267748-5268110	NA	NA
cg07075238	-0.175322	0.63433	-6.70484	1.22317e-10	2.19601e-09	13.1238	0.559951	0.735273	0.175322	17	72110357	F	I		IGR	opensea	IGR-opensea		NA	NA
cg09142848	-0.152454	0.808825	-6.70385	1.23029e-10	2.2066e-09	13.1181	0.744147	0.896602	0.152454	8	850121	R	I		IGR	island	IGR-island	chr8:850103-850405	NA	NA
cg13775050	0.151758	0.224558	6.70302	1.23631e-10	2.21662e-09	13.1133	0.28894	0.137181	-0.151758	11	104916075	R	II	CARD16	TSS200	opensea	TSS200-opensea		NA	NA
cg05373251	-0.161351	0.552701	-6.70096	1.25127e-10	2.24e-09	13.1015	0.484249	0.6456	0.161351	17	79451985	R	I		IGR	shore	IGR-shore	chr17:79450924-79451657	NA	NA
cg02886375	-0.150343	0.841379	-6.69999	1.25839e-10	2.25151e-09	13.0959	0.777597	0.927939	0.150343	8	1244286	R	I		IGR	shore	IGR-shore	chr8:1245671-1246464	NA	NA
cg21222178	-0.167935	0.730137	-6.69812	1.27221e-10	2.27421e-09	13.0852	0.658892	0.826826	0.167935	19	17759409	R	I	UNC13A	Body	island	Body-island	chr19:17759189-17759410	NA	NA
cg07572317	-0.163383	0.831447	-6.69529	1.29341e-10	2.30879e-09	13.069	0.762133	0.925517	0.163383	10	135029782	F	I	KNDC1	Body	shore	Body-shore	chr10:135029238-135029505	NA	NA		rs4838673
cg23241448	0.157823	0.297446	6.69453	1.2992e-10	2.31796e-09	13.0646	0.364401	0.206578	-0.157823	17	750379	F	I	NXN	Body	opensea	Body-opensea		NA	NA			rs74660684
cg19533958	-0.154279	0.795529	-6.68991	1.33469e-10	2.37517e-09	13.0382	0.730078	0.884357	0.154279	5	4116185	F	I		IGR	opensea	IGR-opensea		NA	NA			rs79316142
cg23401796	-0.198882	0.755189	-6.68555	1.36914e-10	2.43072e-09	13.0132	0.670815	0.869697	0.198882	8	141248667	R	I	TRAPPC9	Body	opensea	Body-opensea		TRUE	TRUE
cg24150032	-0.170035	0.743707	-6.68239	1.39464e-10	2.47099e-09	12.9952	0.67157	0.841606	0.170035	10	1219405	R	I		IGR	island	IGR-island	chr10:1219146-1219427	NA	NA			rs2102096
cg08892613	-0.185618	0.634923	-6.68236	1.39486e-10	2.4712e-09	12.995	0.556176	0.741795	0.185618	5	2702419	F	I		IGR	opensea	IGR-opensea		NA	NA
cg04004158	-0.161497	0.370233	-6.67434	1.46163e-10	2.5788e-09	12.9492	0.301719	0.463216	0.161497	16	1152474	F	I		IGR	island	IGR-island	chr16:1152412-1152700	NA	NA		rs35994231
cg10294939	-0.189795	0.684895	-6.67336	1.47005e-10	2.59239e-09	12.9435	0.604375	0.794171	0.189795	10	1850312	R	I		IGR	opensea	IGR-opensea		NA	NA
cg02010013	-0.169919	0.715992	-6.67316	1.47173e-10	2.59501e-09	12.9424	0.643905	0.813824	0.169919	5	4629573	R	I		IGR	opensea	IGR-opensea		NA	NA
cg16201883	-0.172387	0.636129	-6.66185	1.57206e-10	2.75355e-09	12.8778	0.562994	0.735382	0.172387	17	79495953	F	I	FSCN2	1stExon	island	1stExon-island	chr17:79495005-79496291	NA	NA
cg00750880	-0.176581	0.651143	-6.66147	1.57547e-10	2.75872e-09	12.8756	0.57623	0.752811	0.176581	17	75681168	F	I		IGR	opensea	IGR-opensea		NA	TRUE
cg20415517	-0.158454	0.787621	-6.65814	1.60633e-10	2.80636e-09	12.8566	0.720399	0.878852	0.158454	11	1444768	R	I	BRSK2	Body	opensea	Body-opensea		NA	NA
cg18447419	-0.175744	0.696732	-6.64841	1.69988e-10	2.9546e-09	12.8011	0.622174	0.797918	0.175744	5	496299	R	I	SLC9A3	Body	shore	Body-shore	chr5:498111-498430	TRUE	NA
cg03616722	-0.160003	0.829123	-6.64765	1.70741e-10	2.9665e-09	12.7968	0.761243	0.921246	0.160003	13	112602415	F	I		IGR	opensea	IGR-opensea		NA	NA		rs12018048
cg07385694	-0.152559	0.691747	-6.63861	1.79954e-10	3.11133e-09	12.7453	0.627026	0.779584	0.152559	12	132900464	R	I	GALNT9	Body	island	Body-island	chr12:132900224-132901089	NA	NA
cg10002860	-0.159208	0.541473	-6.63768	1.80932e-10	3.12643e-09	12.74	0.473931	0.633139	0.159208	11	1482176	F	I	BRSK2	Body	island	Body-island	chr11:1481778-1482644	NA	NA
cg24755177	-0.152571	0.656594	-6.63571	1.83013e-10	3.15877e-09	12.7288	0.591867	0.744438	0.152571	19	54850645	R	I	LILRA4	TSS1500	opensea	TSS1500-opensea		NA	NA
cg00319661	-0.151921	0.764011	-6.62751	1.91934e-10	3.29789e-09	12.6821	0.69956	0.85148	0.151921	5	2632178	F	I		IGR	opensea	IGR-opensea		NA	NA
cg14277925	-0.158819	0.627809	-6.6194	2.01185e-10	3.4403e-09	12.636	0.560432	0.719251	0.158819	11	859532	F	I	TSPAN4	5'UTR	shore	5'UTR-shore	chr11:858575-858932	TRUE	NA
cg02369450	-0.158412	0.761856	-6.61678	2.04259e-10	3.48673e-09	12.6212	0.694651	0.853063	0.158412	5	1950212	F	I		IGR	shore	IGR-shore	chr5:1950624-1950922	NA	NA		rs78088625
cg25153741	-0.158121	0.672966	-6.61236	2.09564e-10	3.56783e-09	12.596	0.605884	0.764005	0.158121	5	177913468	F	I	COL23A1	Body	opensea	Body-opensea		NA	NA			rs75977787
cg07569918	-0.151638	0.524046	-6.61088	2.11368e-10	3.59447e-09	12.5876	0.459715	0.611352	0.151638	1	212002970	F	II	LPGAT1	5'UTR	shore	5'UTR-shore	chr1:212003431-212004280	TRUE	NA
cg13625875	0.155444	0.365983	6.60546	2.18105e-10	3.69752e-09	12.5569	0.431929	0.276485	-0.155444	4	54959419	R	I		IGR	shore	IGR-shore	chr4:54957979-54958542	NA	NA
cg27104173	-0.179876	0.763815	-6.6045	2.19318e-10	3.71512e-09	12.5514	0.687504	0.867381	0.179876	7	157744316	F	I	PTPRN2	Body	opensea	Body-opensea		NA	NA
cg05848579	-0.159383	0.642015	-6.60218	2.2229e-10	3.75981e-09	12.5383	0.574398	0.733781	0.159383	16	1308103	F	I	TPSD1	Body	island	Body-island	chr16:1308004-1308308	NA	NA		rs61753447
cg24500294	-0.157214	0.740718	-6.59412	2.32904e-10	3.91947e-09	12.4926	0.674021	0.831235	0.157214	7	157333519	F	I	PTPRN2	Body	opensea	Body-opensea		NA	NA		rs77028932
cg05949331	-0.168955	0.77092	-6.59278	2.34706e-10	3.94575e-09	12.485	0.699242	0.868197	0.168955	8	143666563	R	I		IGR	opensea	IGR-opensea		NA	NA
cg27325820	-0.15705	0.761247	-6.58441	2.46349e-10	4.12189e-09	12.4376	0.69462	0.85167	0.15705	5	166582608	R	I		IGR	opensea	IGR-opensea		NA	TRUE
cg16765600	-0.155343	0.794661	-6.56994	2.67804e-10	4.44661e-09	12.3558	0.728758	0.884101	0.155343	18	10589169	R	I		IGR	island	IGR-island	chr18:10589149-10589386	NA	NA
cg09781994	0.155933	0.362988	6.56796	2.70892e-10	4.49333e-09	12.3445	0.429141	0.273208	-0.155933	4	111548118	R	I	PITX2	Body	shore	Body-shore	chr4:111549879-111550203	NA	NA
cg12809437	-0.156459	0.811319	-6.56079	2.82313e-10	4.6641e-09	12.3041	0.744942	0.901401	0.156459	5	41587871	F	I		IGR	opensea	IGR-opensea		NA	NA
cg10881128	0.159268	0.499954	6.56018	2.83313e-10	4.67891e-09	12.3006	0.567523	0.408255	-0.159268	1	44031826	R	I	PTPRF	Body	island	Body-island	chr1:44031286-44031853	NA	NA
cg15733882	0.151645	0.333041	6.55853	2.86018e-10	4.71925e-09	12.2913	0.397375	0.24573	-0.151645	18	55862627	R	II	NEDD4L	5'UTR	shore	5'UTR-shore	chr18:55862653-55862873	NA	TRUE	low-CpG:54013575-54013937
cg02520212	-0.157927	0.657579	-6.55175	2.97413e-10	4.88557e-09	12.253	0.59058	0.748507	0.157927	12	131061331	F	I		IGR	opensea	IGR-opensea		NA	NA
cg22836359	-0.170848	0.657195	-6.53175	3.33679e-10	5.42007e-09	12.1403	0.584714	0.755562	0.170848	12	6933548	F	I	GPR162	Body	island	Body-island	chr12:6933276-6933605	NA	NA		rs75167863
cg18762036	-0.156024	0.700365	-6.52557	3.45739e-10	5.59329e-09	12.1056	0.634173	0.790197	0.156024	2	107872062	F	I		IGR	opensea	IGR-opensea		NA	NA		rs4676333
cg23968383	-0.161603	0.593594	-6.5205	3.55952e-10	5.74313e-09	12.0771	0.525035	0.686639	0.161603	8	125984927	F	II	ZNF572	TSS1500	opensea	TSS1500-opensea		NA	NA
cg23064609	0.156916	0.562797	6.51734	3.62466e-10	5.83561e-09	12.0593	0.629367	0.472452	-0.156916	2	175208594	R	I		IGR	island	IGR-island	chr2:175208415-175209076	NA	NA
cg02723533	-0.152824	0.733296	-6.51338	3.70783e-10	5.95832e-09	12.0371	0.668461	0.821286	0.152824	11	69468991	R	I	CCND1	3'UTR	island	3'UTR-island	chr11:69468810-69469152	NA	NA
cg13782274	-0.191088	0.663117	-6.5124	3.72868e-10	5.98836e-09	12.0316	0.58205	0.773137	0.191088	20	62097681	F	I	KCNQ2	Body	island	Body-island	chr20:62097193-62098254	NA	NA
cg15601682	-0.168448	0.735331	-6.50761	3.83252e-10	6.14009e-09	12.0047	0.663869	0.832317	0.168448	17	78060121	F	I	CCDC40	Body	opensea	Body-opensea		NA	NA
cg20308663	-0.158752	0.718667	-6.50519	3.88605e-10	6.21839e-09	11.9911	0.651318	0.81007	0.158752	13	100523121	F	I	CLYBL	Body	opensea	Body-opensea		NA	TRUE
cg22348992	-0.198225	0.532958	-6.5016	3.96681e-10	6.33496e-09	11.971	0.448862	0.647087	0.198225	20	61979563	F	I	CHRNA4	Body	island	Body-island	chr20:61979255-61979573	NA	NA
cg02263377	-0.185794	0.760857	-6.49054	4.22624e-10	6.70945e-09	11.9089	0.682035	0.867829	0.185794	14	105195816	R	I	ADSSL1	TSS1500	opensea	TSS1500-opensea		NA	NA
cg17870484	-0.179555	0.740901	-6.48828	4.28124e-10	6.7871e-09	11.8963	0.664727	0.844282	0.179555	5	2515708	R	I		IGR	opensea	IGR-opensea		NA	NA		rs72720931
cg22507887	-0.150989	0.820275	-6.48754	4.29932e-10	6.81347e-09	11.8921	0.756219	0.907208	0.150989	1	157895500	R	I		IGR	opensea	IGR-opensea		NA	NA
cg22399133	0.150462	0.607167	6.4867	4.31996e-10	6.84316e-09	11.8875	0.670999	0.520537	-0.150462	2	208989248	R	I	CRYGD	1stExon	island	1stExon-island	chr2:208988834-208989269	NA	NA
cg23136645	-0.159246	0.697431	-6.48391	4.3894e-10	6.94523e-09	11.8718	0.629873	0.789119	0.159246	2	1418073	R	I	TPO	TSS200	opensea	TSS200-opensea		NA	NA
cg26383138	-0.159617	0.516569	-6.48378	4.3929e-10	6.95041e-09	11.8711	0.448853	0.60847	0.159617	2	2119533	R	I	MYT1L	5'UTR	opensea	5'UTR-opensea		NA	NA
cg06627617	0.158286	0.517821	6.48026	4.48201e-10	7.07934e-09	11.8514	0.584973	0.426687	-0.158286	2	9471179	R	I	ASAP2	Body	opensea	Body-opensea		NA	TRUE
cg10896609	-0.178743	0.674844	-6.47821	4.53494e-10	7.15542e-09	11.8399	0.599013	0.777756	0.178743	6	168594903	R	I		IGR	shelf	IGR-shelf	chr6:168590832-168591394	TRUE	NA
cg12769705	-0.157486	0.560524	-6.47629	4.58495e-10	7.2261e-09	11.8292	0.493712	0.651198	0.157486	10	125521557	R	I	CPXM2	Body	opensea	Body-opensea		NA	NA
cg14671764	-0.177623	0.710903	-6.4749	4.62151e-10	7.2799e-09	11.8214	0.635548	0.813171	0.177623	2	1690592	F	I	PXDN	Body	opensea	Body-opensea		TRUE	TRUE
cg00494919	-0.167815	0.780035	-6.47256	4.68362e-10	7.36775e-09	11.8083	0.708841	0.876656	0.167815	10	135020822	F	I	KNDC1	Body	island	Body-island	chr10:135020618-135020932	NA	NA		rs12028
cg14646111	-0.18189	0.708947	-6.47057	4.73706e-10	7.44306e-09	11.7972	0.631781	0.813671	0.18189	20	18489660	F	I	SEC23B	5'UTR	shore	5'UTR-shore	chr20:18488084-18488804	NA	NA
cg02486855	-0.157356	0.505565	-6.46755	4.81953e-10	7.5601e-09	11.7803	0.438807	0.596164	0.157356	15	67356942	F	I	SMAD3	TSS1500	shore	TSS1500-shore	chr15:67357339-67359061	TRUE	NA
cg04806177	-0.171805	0.691454	-6.4643	4.90992e-10	7.68852e-09	11.7621	0.618567	0.790372	0.171805	16	1991447	F	I	SEPX1	Body	shore	Body-shore	chr16:1992668-1993646	NA	NA
cg18016254	0.150028	0.38787	6.46366	4.9278e-10	7.7145e-09	11.7586	0.451519	0.30149	-0.150028	3	122296505	R	II	PARP15	5'UTR	shore	5'UTR-shore	chr3:122296612-122296828	NA	NA	low-CpG:123779095-123779200
cg12344373	-0.157869	0.638717	-6.45109	5.29374e-10	8.22985e-09	11.6884	0.571743	0.729611	0.157869	7	1398209	F	I		IGR	opensea	IGR-opensea		TRUE	NA			rs73268447
cg23731272	-0.153576	0.547808	-6.45039	5.31504e-10	8.25905e-09	11.6845	0.482654	0.63623	0.153576	15	67356838	R	I	SMAD3	TSS1500	shore	TSS1500-shore	chr15:67357339-67359061	TRUE	NA
cg19486070	-0.201178	0.793895	-6.44757	5.40101e-10	8.37747e-09	11.6688	0.708547	0.909725	0.201178	7	1626153	F	I	KIAA1908	Body	opensea	Body-opensea		NA	NA
cg23708763	0.152959	0.278126	6.44507	5.47854e-10	8.4864e-09	11.6549	0.343017	0.190058	-0.152959	14	23291897	F	II		IGR	island	IGR-island	chr14:23291689-23292278	TRUE	NA		rs11625306
cg17090954	-0.152568	0.798888	-6.44384	5.5172e-10	8.53994e-09	11.648	0.734163	0.886731	0.152568	8	1364458	F	I		IGR	shore	IGR-shore	chr8:1365174-1365503	NA	NA
cg07558472	0.191375	0.320638	6.44261	5.55587e-10	8.59253e-09	11.6411	0.401828	0.210452	-0.191375	5	139048005	F	I	CXXC5	5'UTR	island	5'UTR-island	chr5:139047905-139048235	NA	TRUE
cg26458142	-0.156581	0.587362	-6.44217	5.56972e-10	8.611e-09	11.6387	0.520933	0.677514	0.156581	5	22053875	R	I	CDH12	Body	opensea	Body-opensea		NA	TRUE
cg24066980	-0.151259	0.762857	-6.44129	5.59788e-10	8.65268e-09	11.6338	0.698686	0.849945	0.151259	2	1864151	F	I	MYT1L	Body	opensea	Body-opensea		NA	NA
cg26107890	0.210612	0.389968	6.43219	5.89529e-10	9.06845e-09	11.5831	0.479319	0.268707	-0.210612	3	124860686	R	I	SLC12A8	Body	island	Body-island	chr3:124860569-124861019	TRUE	NA
cg12040210	-0.158894	0.703444	-6.41863	6.36741e-10	9.71756e-09	11.5077	0.636035	0.794929	0.158894	1	5540878	R	I		IGR	opensea	IGR-opensea		NA	NA
cg20157873	-0.151603	0.640634	-6.4144	6.52212e-10	9.92804e-09	11.4842	0.576318	0.72792	0.151603	7	152788733	R	I		IGR	opensea	IGR-opensea		NA	NA
cg16337185	-0.15242	0.743191	-6.40449	6.89943e-10	1.04436e-08	11.4292	0.678528	0.830948	0.15242	2	81694608	R	I		IGR	island	IGR-island	chr2:81694322-81694681	NA	NA
cg16313382	-0.16463	0.829679	-6.39801	7.15753e-10	1.07959e-08	11.3932	0.759836	0.924466	0.16463	18	77273814	R	I	NFATC1	Body	shore	Body-shore	chr18:77272584-77273603	NA	NA
cg17277001	-0.161336	0.503056	-6.39572	7.25086e-10	1.09234e-08	11.3805	0.434611	0.595947	0.161336	5	1244503	R	I	SLC6A18	Body	shore	Body-shore	chr5:1245901-1246927	NA	TRUE
cg16035036	-0.166669	0.803108	-6.39488	7.28532e-10	1.09694e-08	11.3759	0.732401	0.899069	0.166669	5	1363899	F	I		IGR	opensea	IGR-opensea		NA	NA		rs78927562
cg22723502	0.162019	0.402259	6.39032	7.47612e-10	1.12304e-08	11.3506	0.470994	0.308975	-0.162019	6	26240528	R	I	HIST1H4F	TSS200	shore	TSS200-shore	chr6:26240697-26240951	NA	NA
cg22770560	-0.159128	0.808835	-6.38816	7.56811e-10	1.13525e-08	11.3386	0.741326	0.900454	0.159128	7	157345452	R	I	PTPRN2	Body	shore	Body-shore	chr7:157346613-157347069	NA	NA
[truncated: 83 more rows]
